# Supplementary material
Source: MDPI journal article supplement (https://www.mdpi.com/1424-8247/15/3/330)

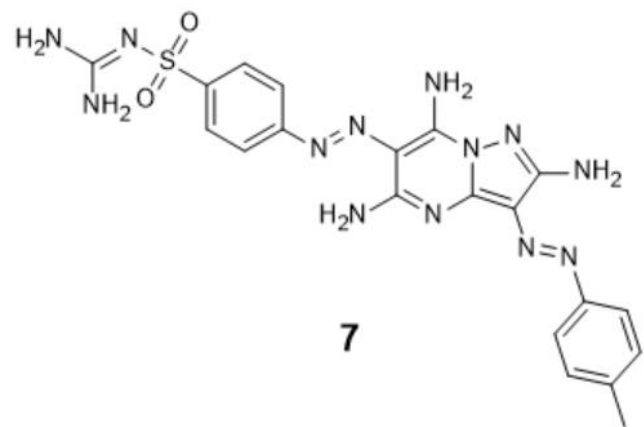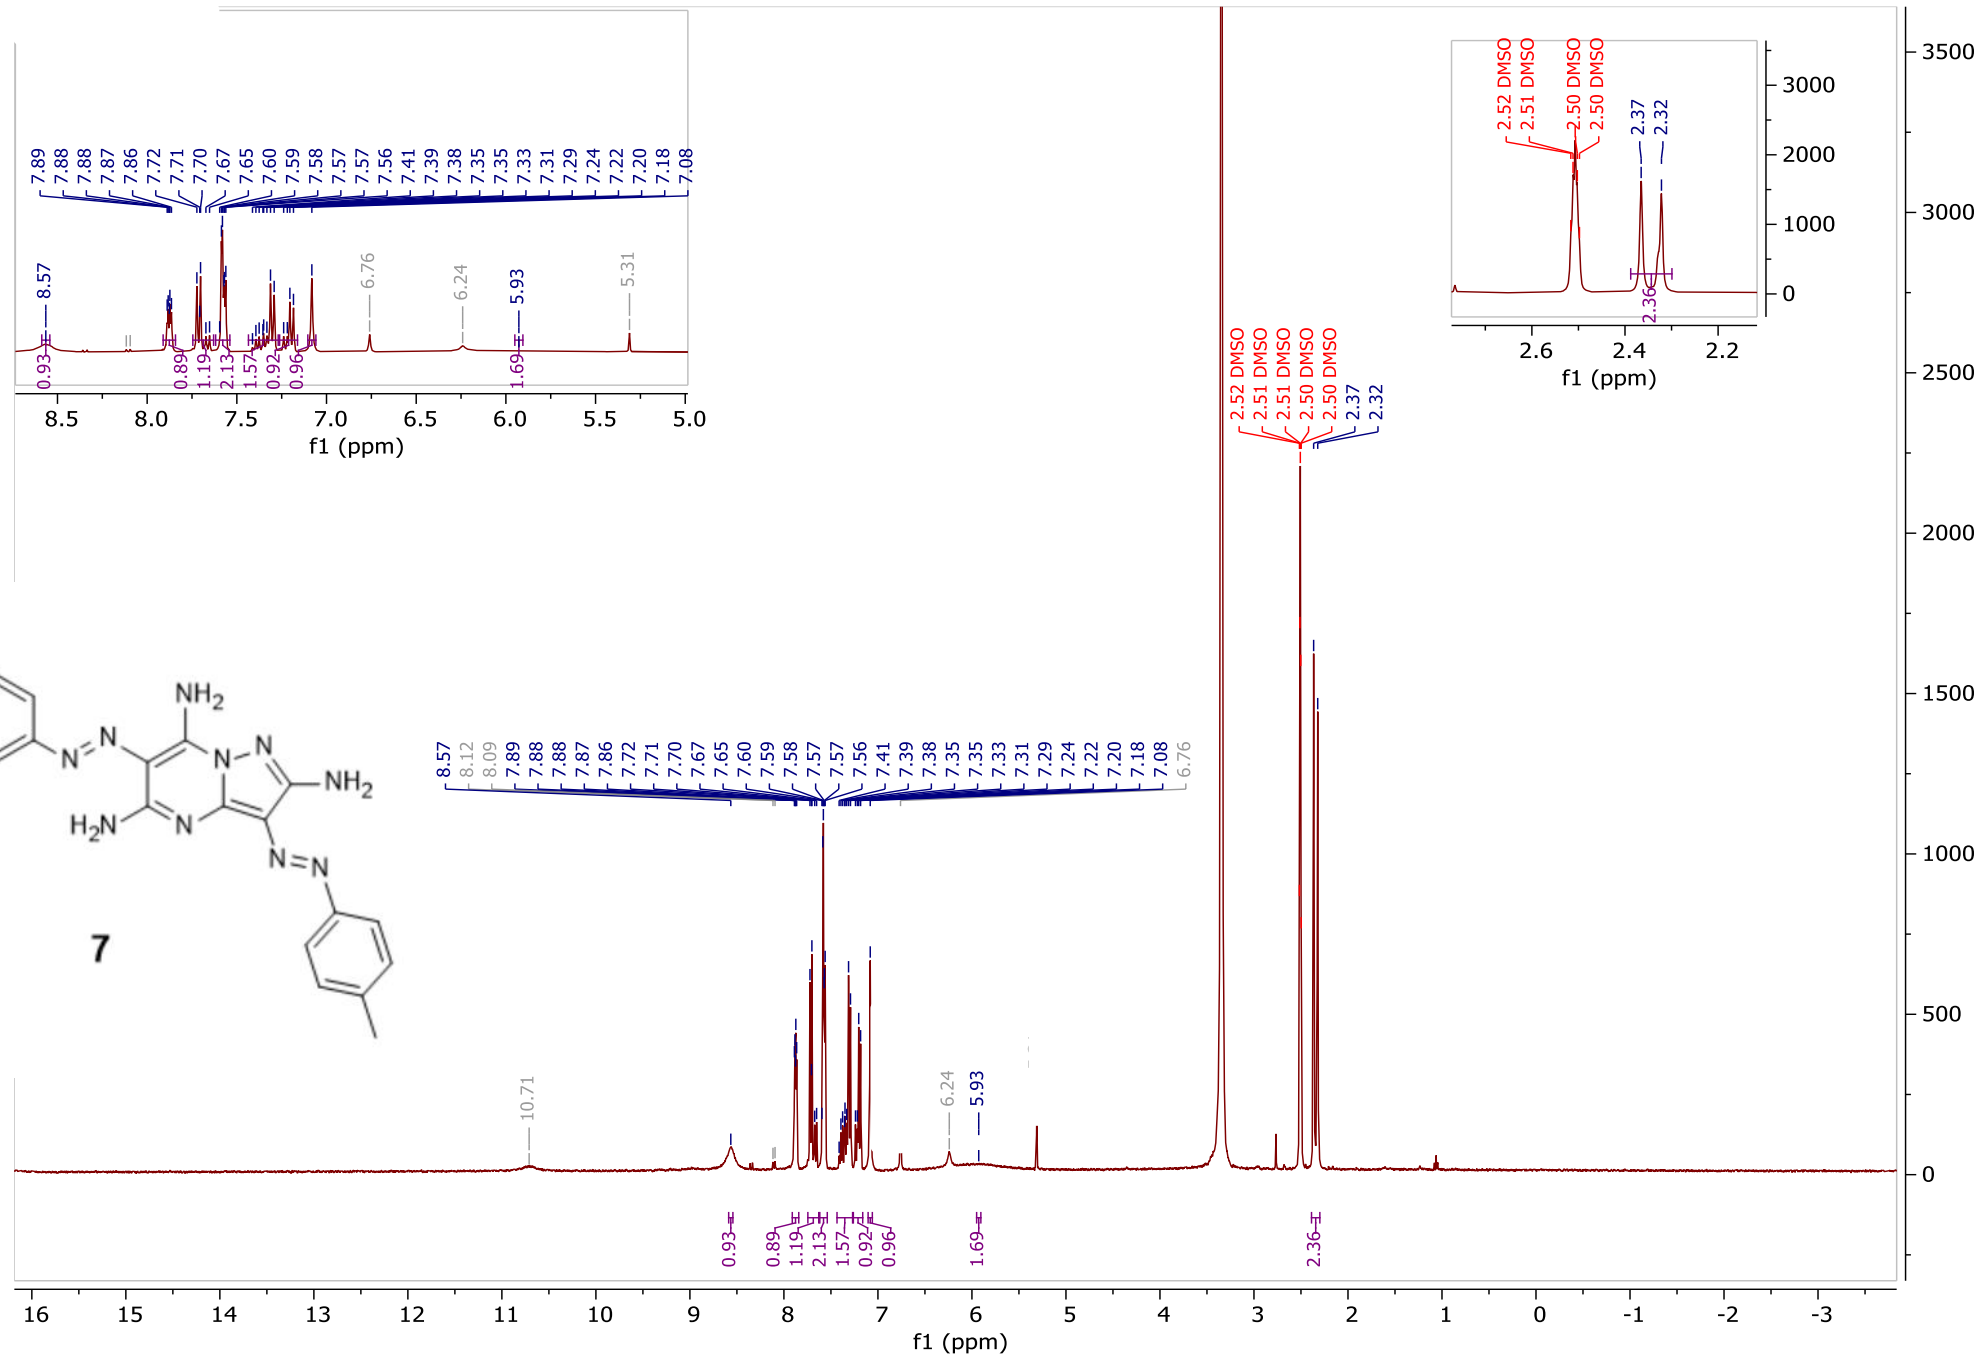

**<sup>1</sup>H-NMR spectrum of compound 7**

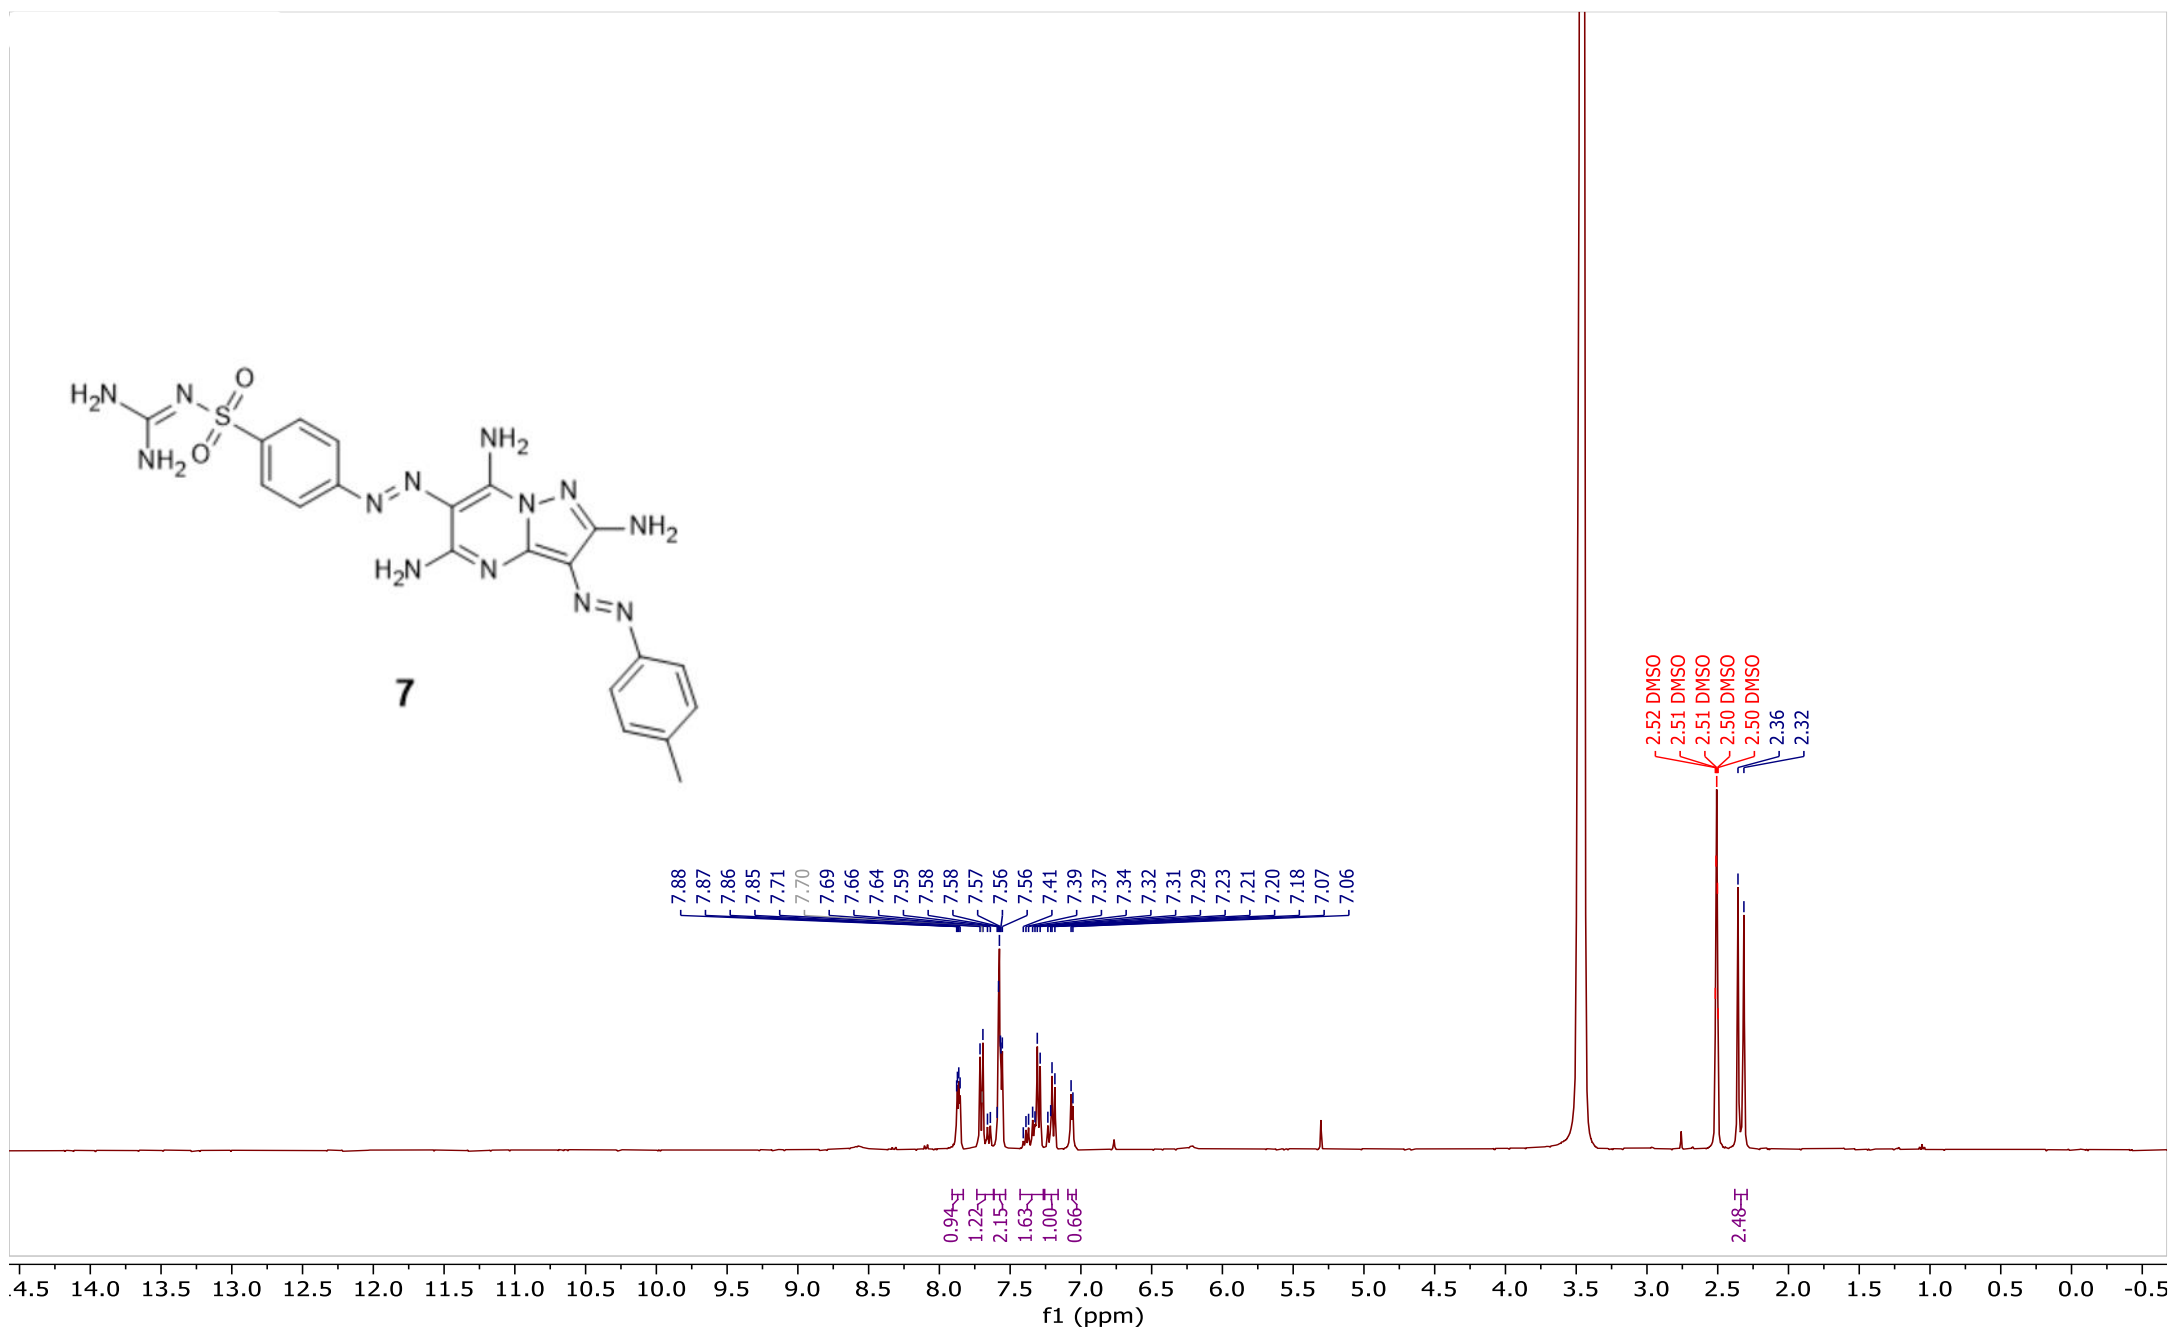

**<sup>1</sup>H-NMR – D<sub>2</sub>O spectrum of compound 7**

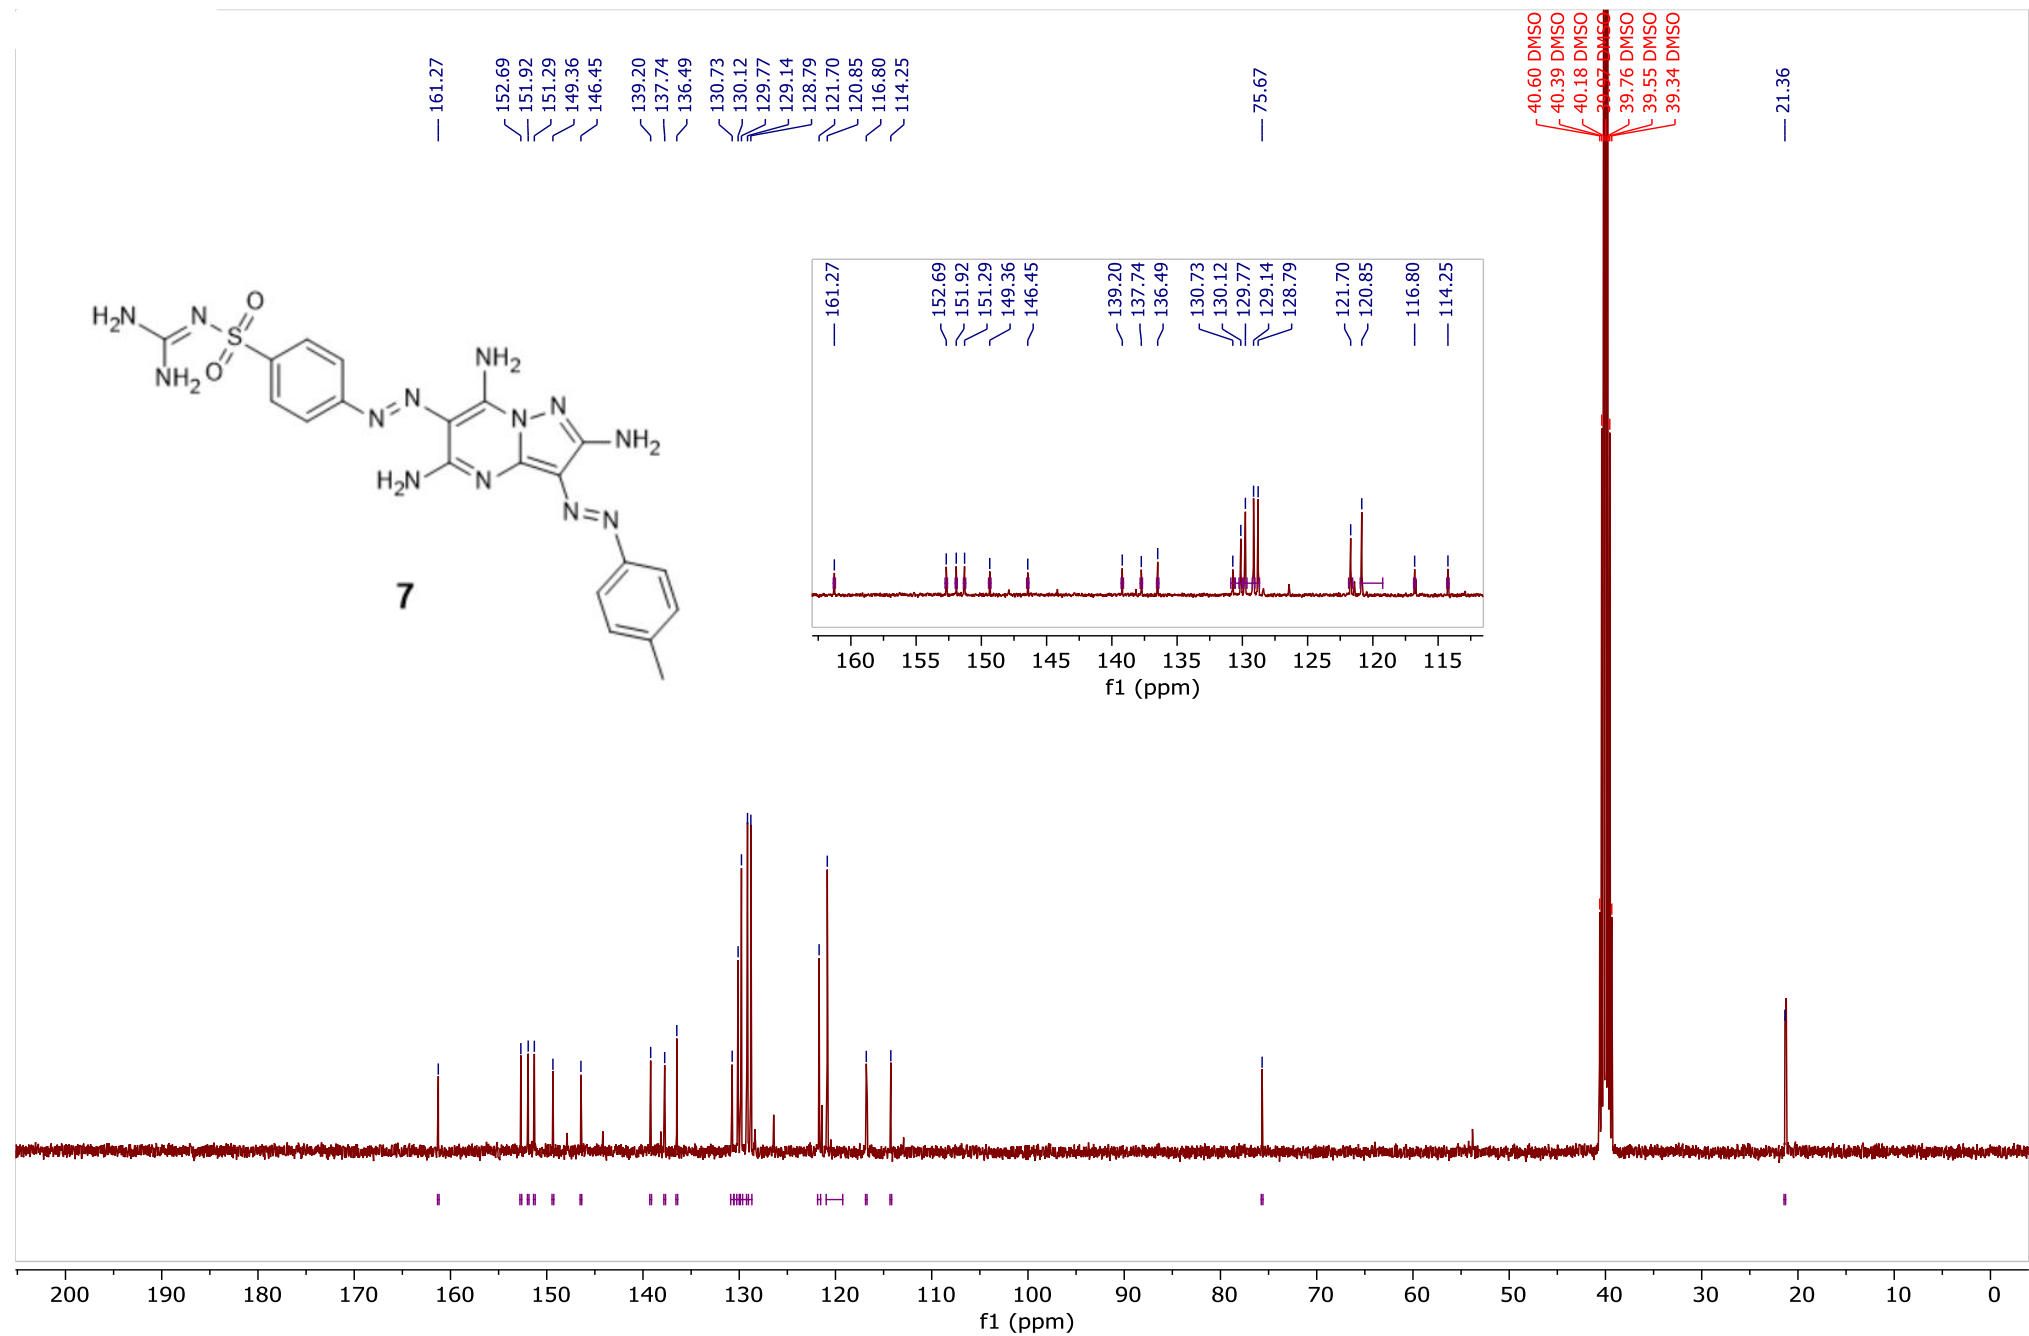

**<sup>13</sup>C-NMR spectrum of compound 7**

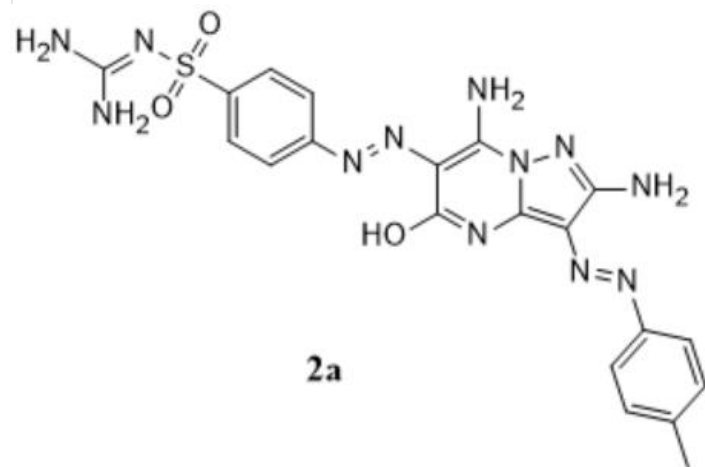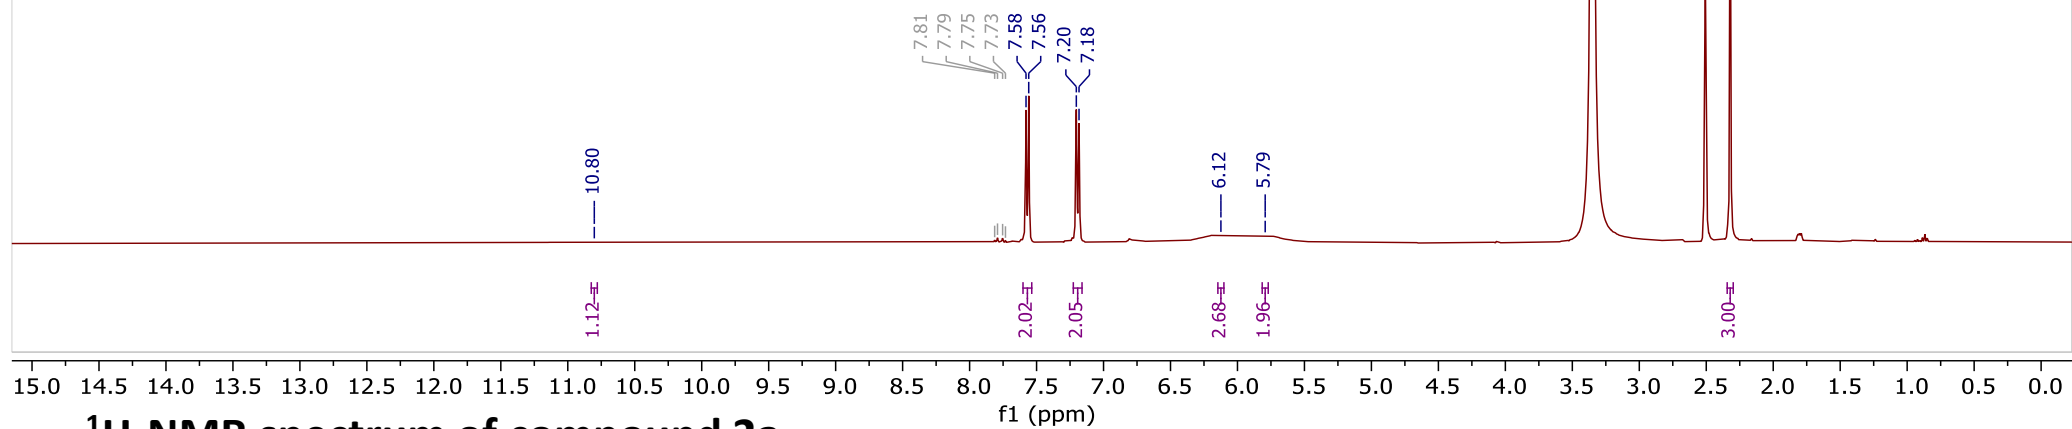

<sup>1</sup>H-NMR spectrum of compound 2a



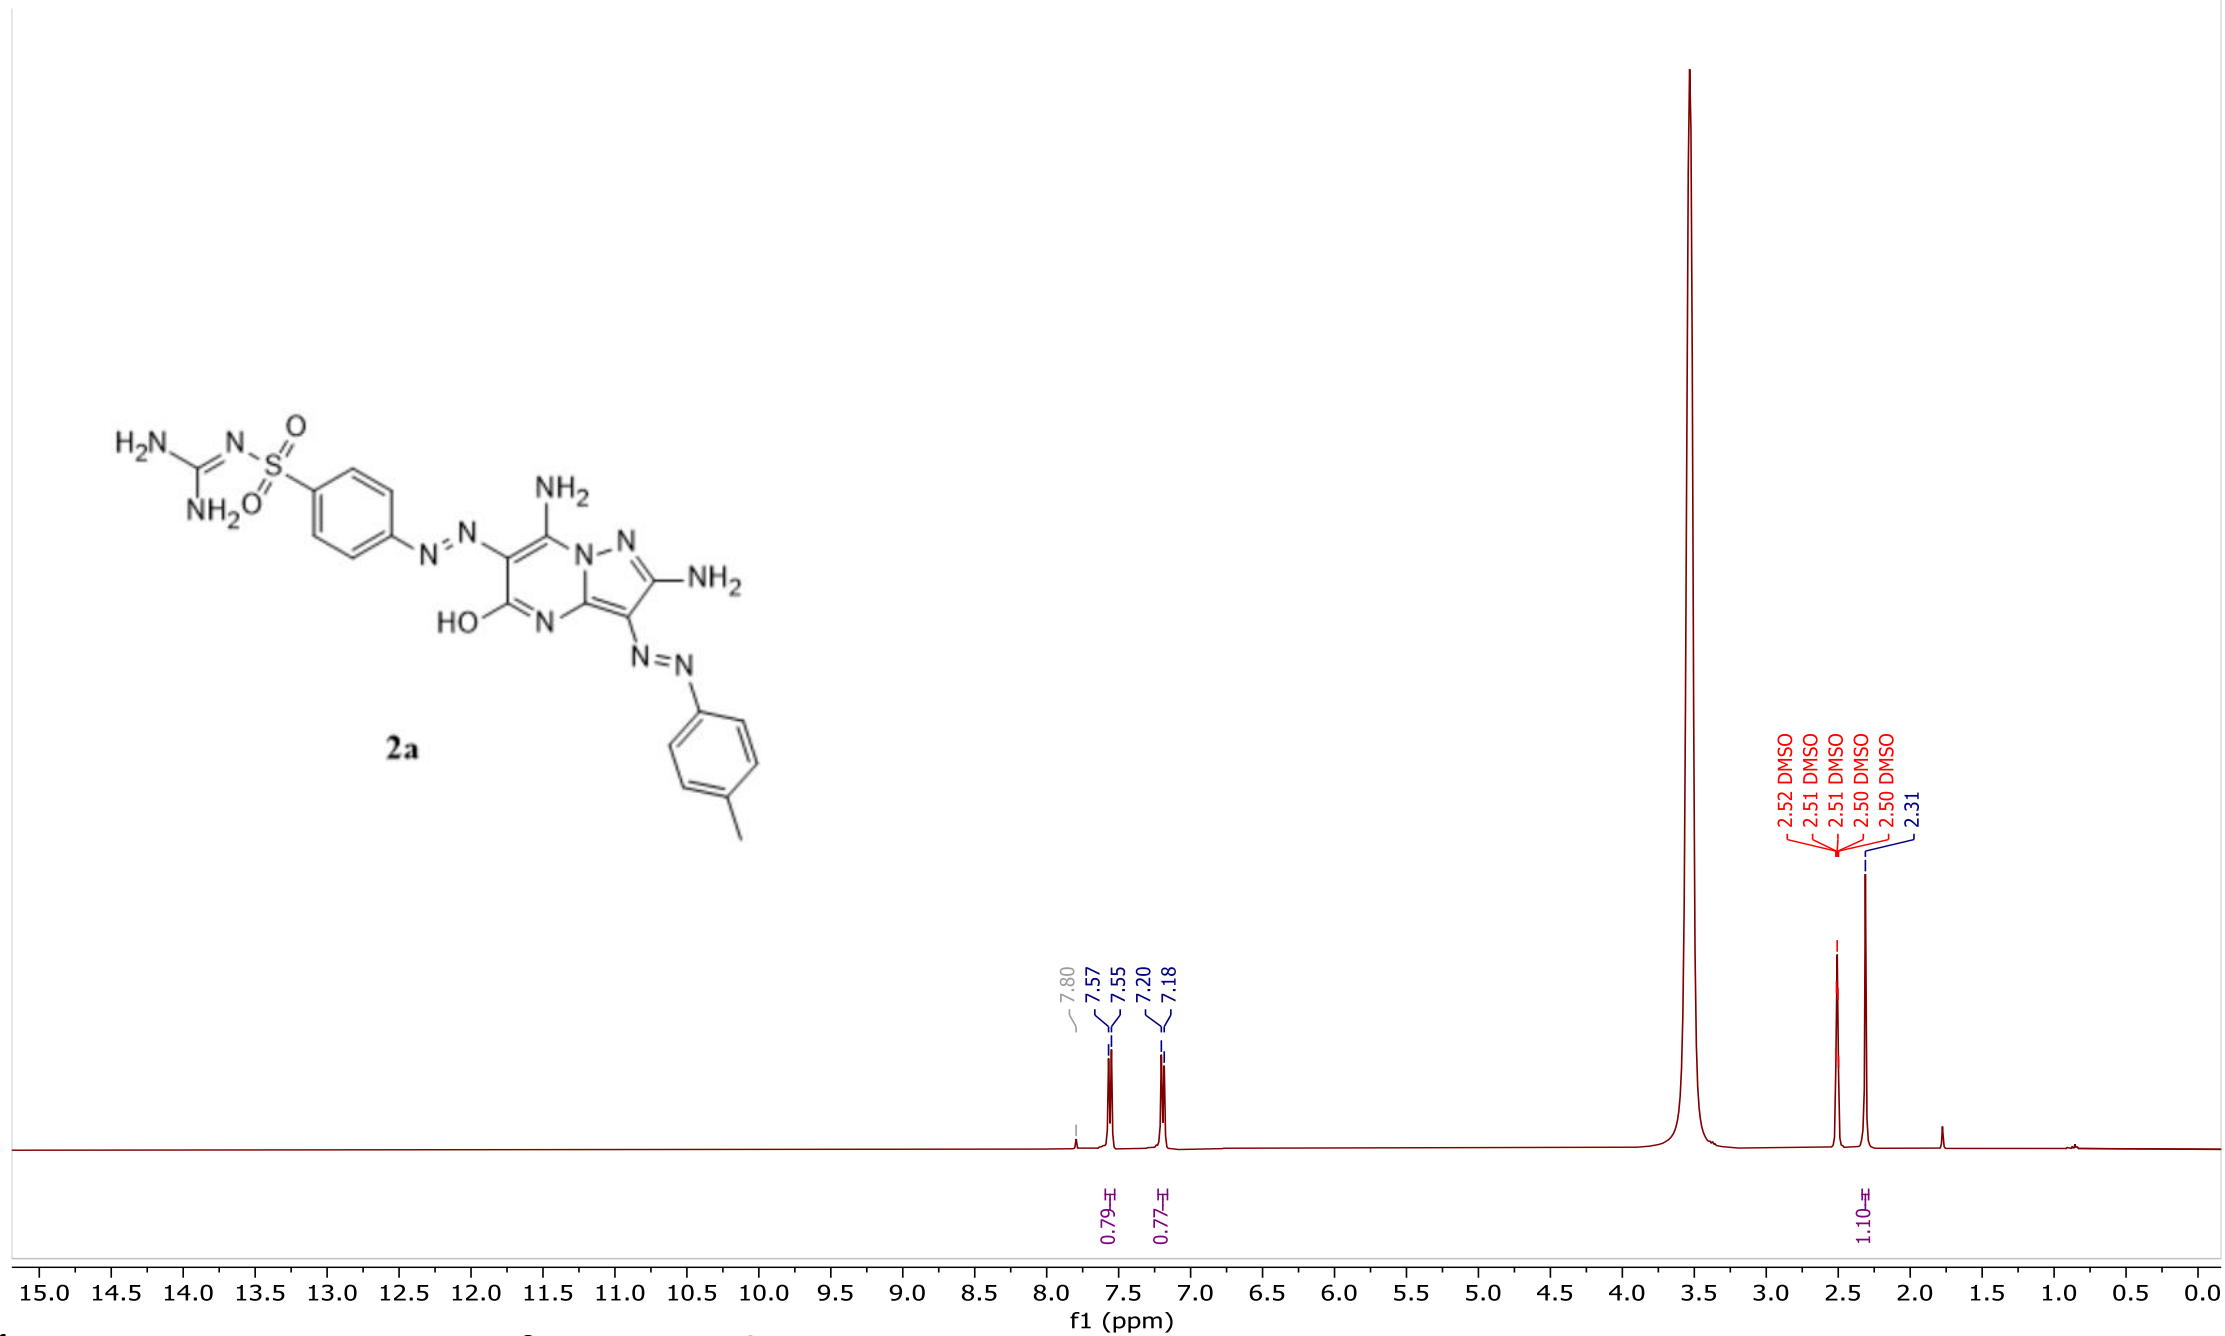

IR spectrum of compound 2a

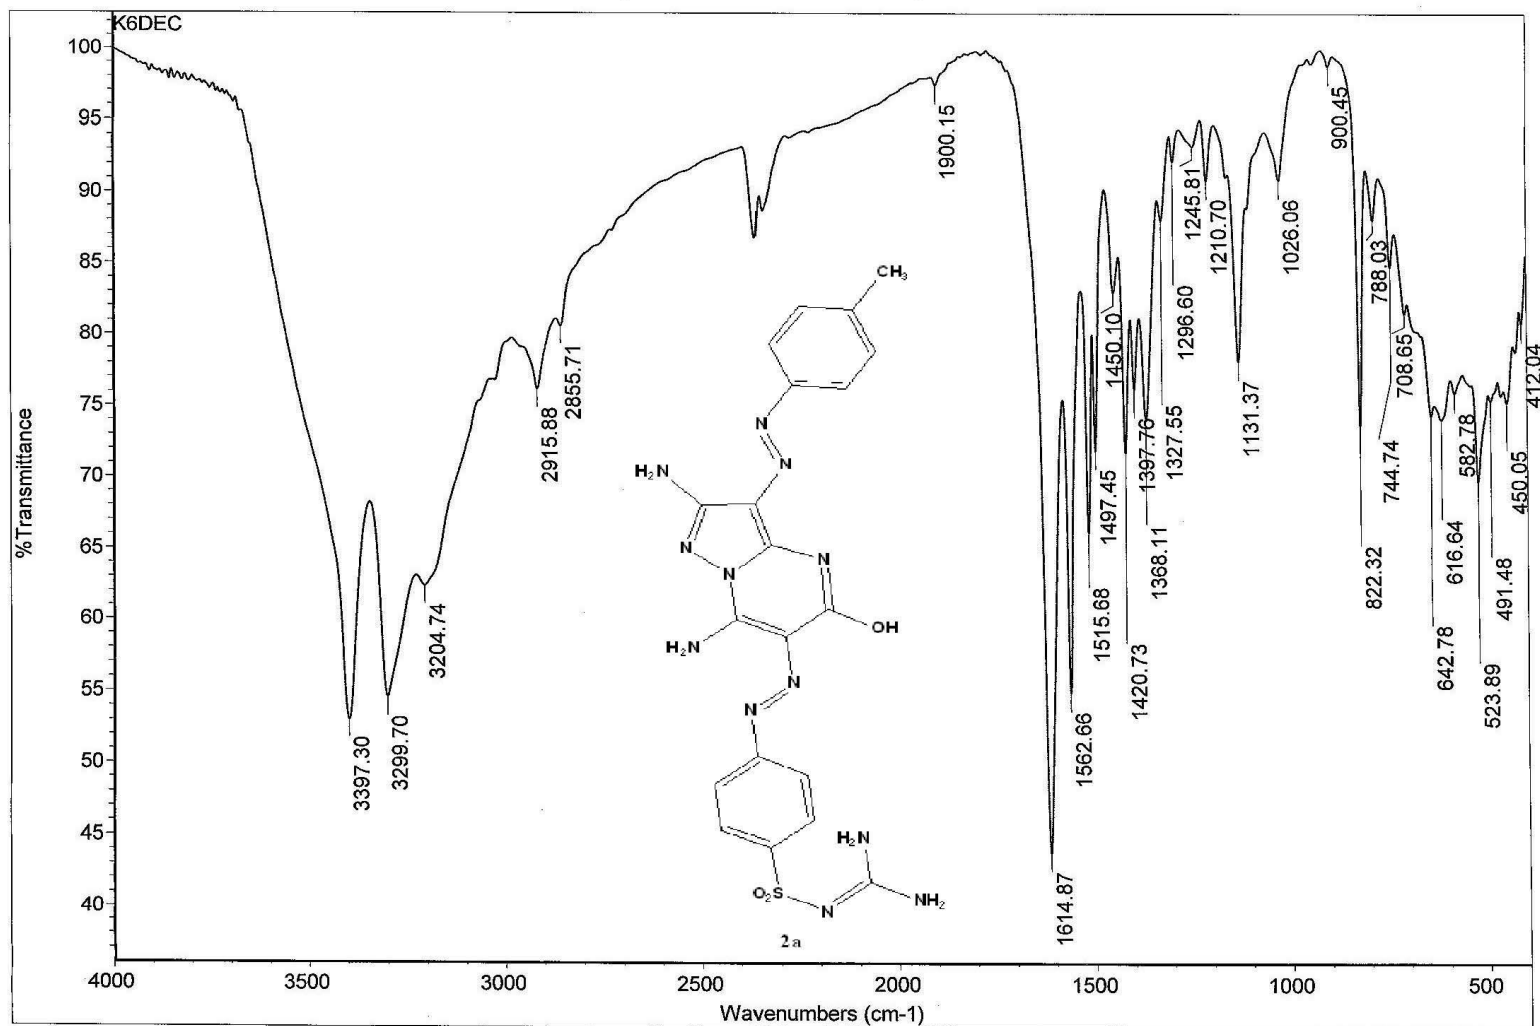

nshed-abd-elfattah-k6DEC #177 RT: 2.98 AV: 1 SB: 2 4.45 , 4.45 NL: 4.40E2  
T: {0,0} + c EI Full ms [40.00-1000.00]

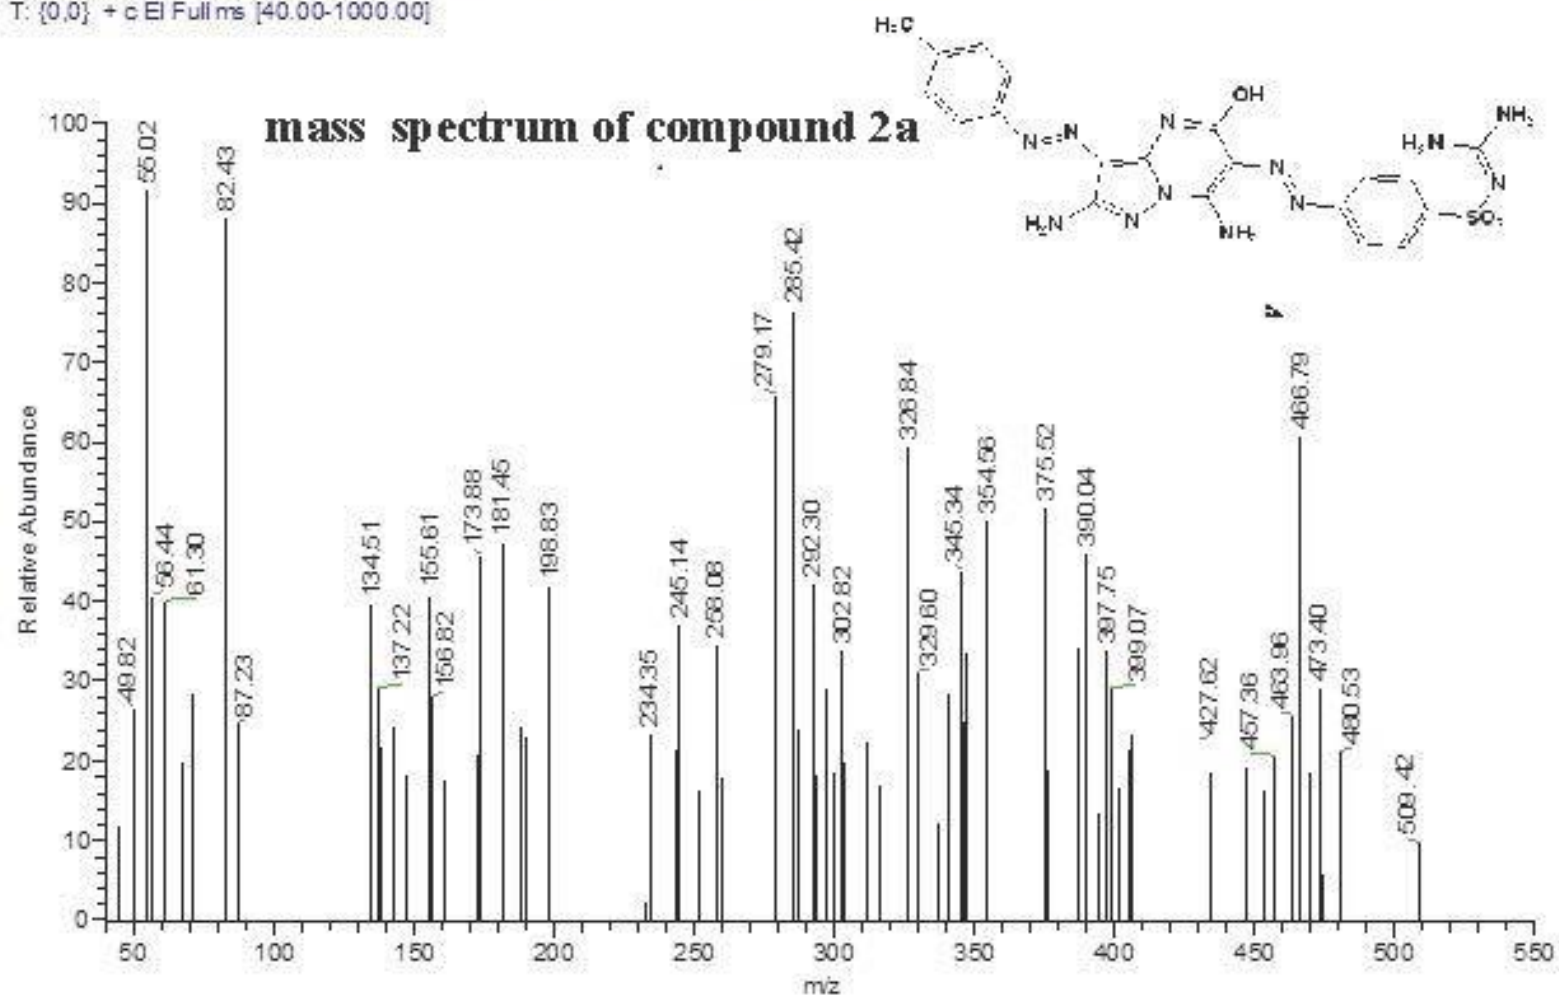

NECK6.0

IR spectrum of compound 2b

10/31/2019

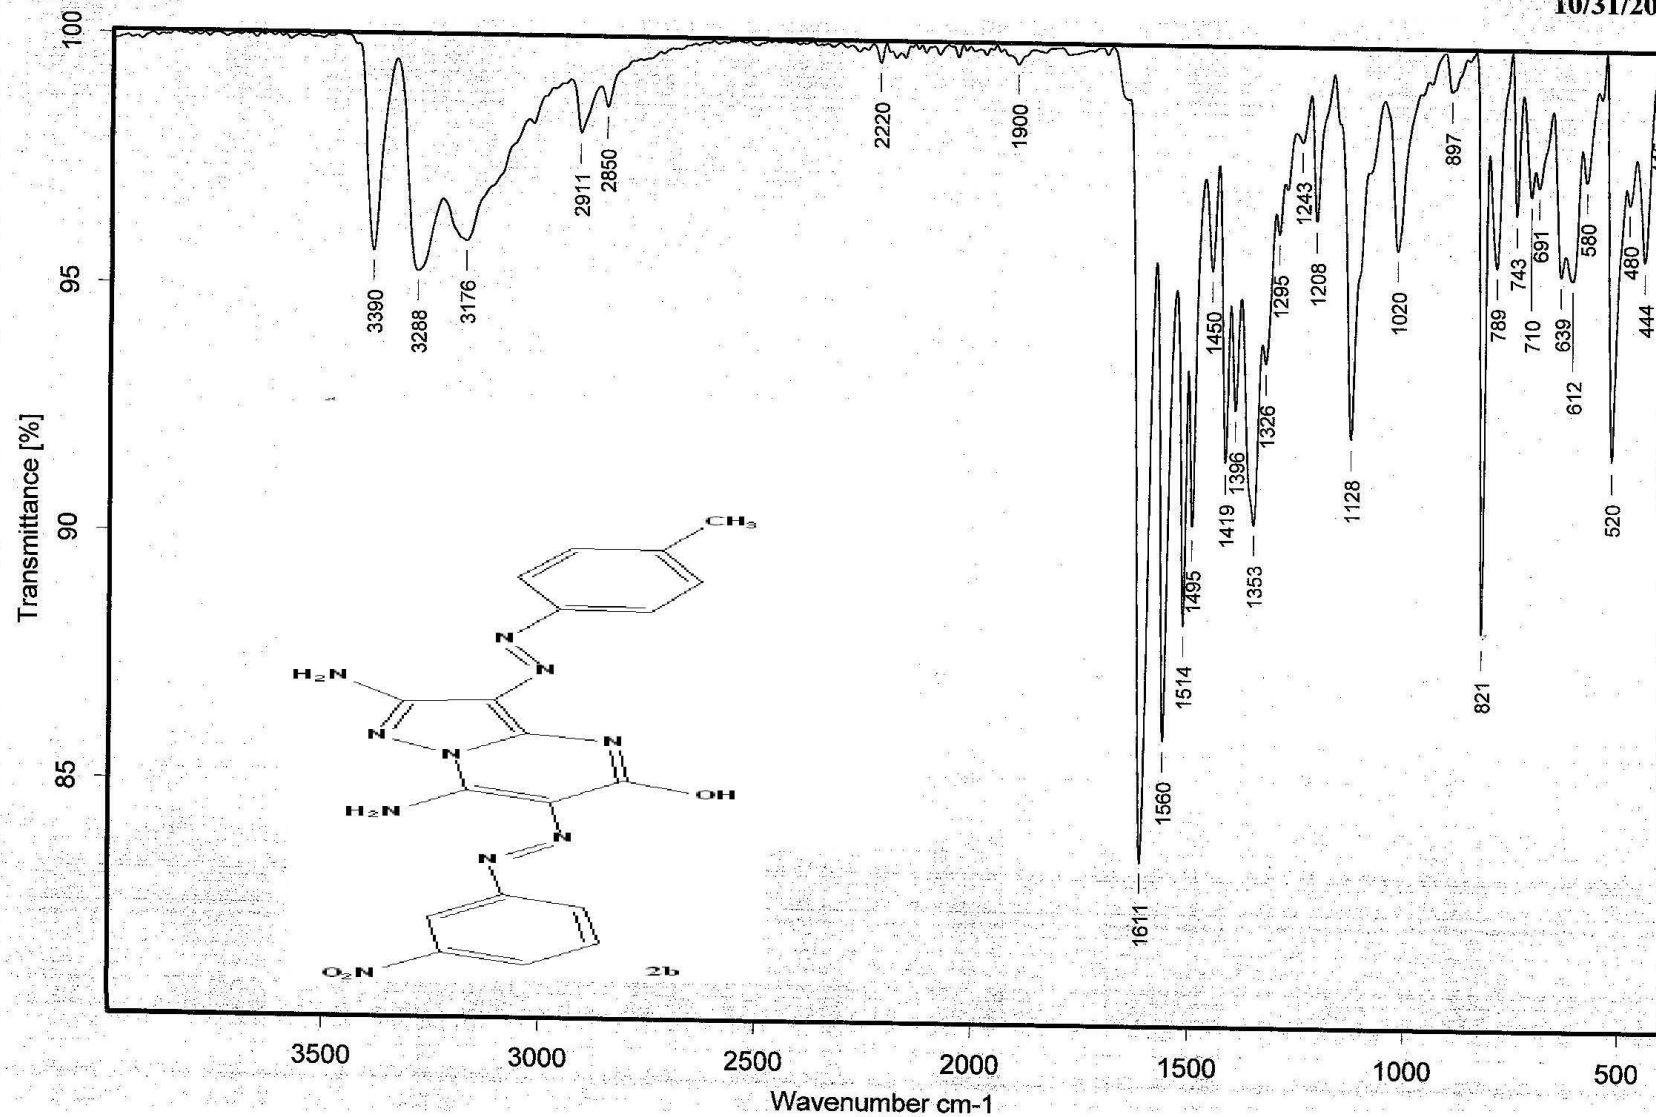

# <sup>1</sup>H-NMR spectrum of compound 2b

KerlessIkram-K6NEC-DMSO-H1

Archive directory: /export/home/vnmr1/vnmrsys/data  
Sample directory: DD5mm\_test\_12Mar2014-21:34:40  
File: PROTON

Pulse Sequence: s2pu1  
Solvent: DMSO  
Temp. 30.0 C / 303.1 K  
Mercury-300BB "NMR300"

Relax. delay 6.000 sec  
Pulse 45.0 degrees  
Acq. time 4.000 sec  
Width 6600.7 Hz  
15 repetitions  
OBSERVE H1, 300.0687871 MHz  
DATA PROCESSING  
FT size 65536  
Total time 58 min, 55 sec  
Date: Feb 19 2020

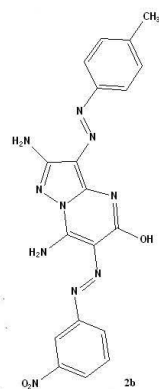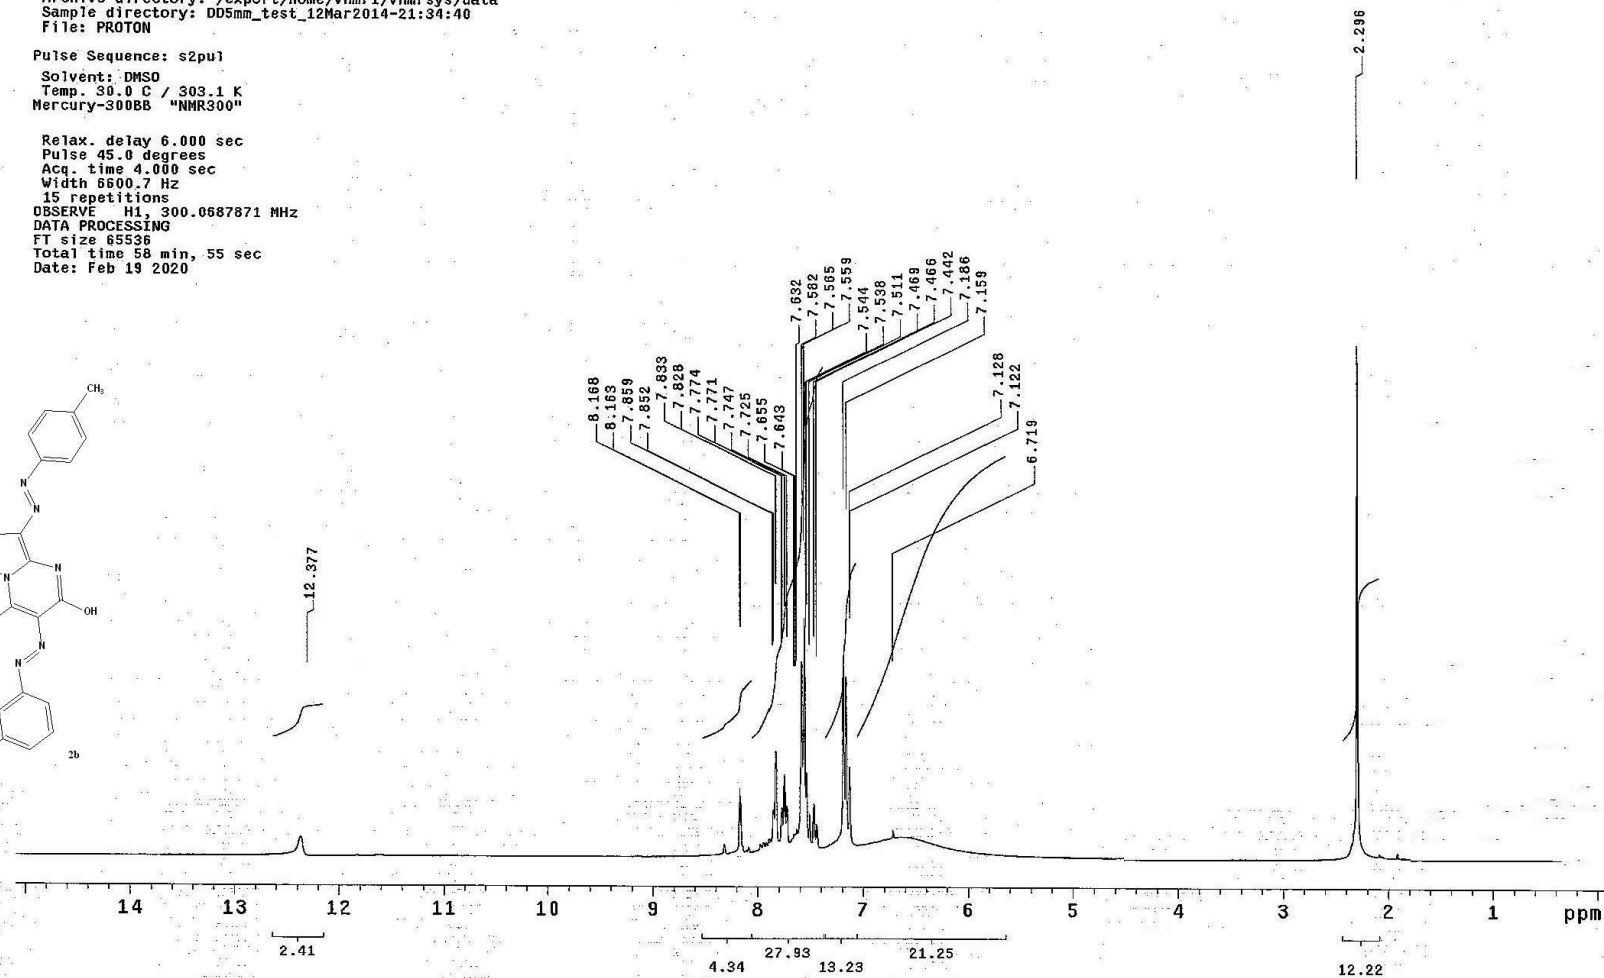

# **<sup>1</sup>H-NMR-D<sub>2</sub>O spectrum of compound 2b**

KerlessIkram-K6NEC-DMSO-D<sub>2</sub>O-H1

Archive directory: /export/home/vnmr1/vnmrsys/data  
Sample directory: DD5mm\_test\_12Mar2014-21:34:40  
File: PROTON

Pulse Sequence: s2pu1

Solvent: DMSO  
Temp. 30.0 C / 303.1 K  
Mercury-300BB "NMR300"

Relax. delay 6.000 sec  
Pulse 45.0 degrees  
Acq. time 4.000 sec  
Width 6600.7 Hz  
14 repetitions  
OBSERVE H1, 300.0687871 MHz  
DATA PROCESSING  
FT size 65536  
Total time 58 min, 55 sec  
Date: Feb 19 2020

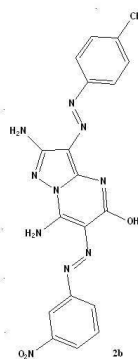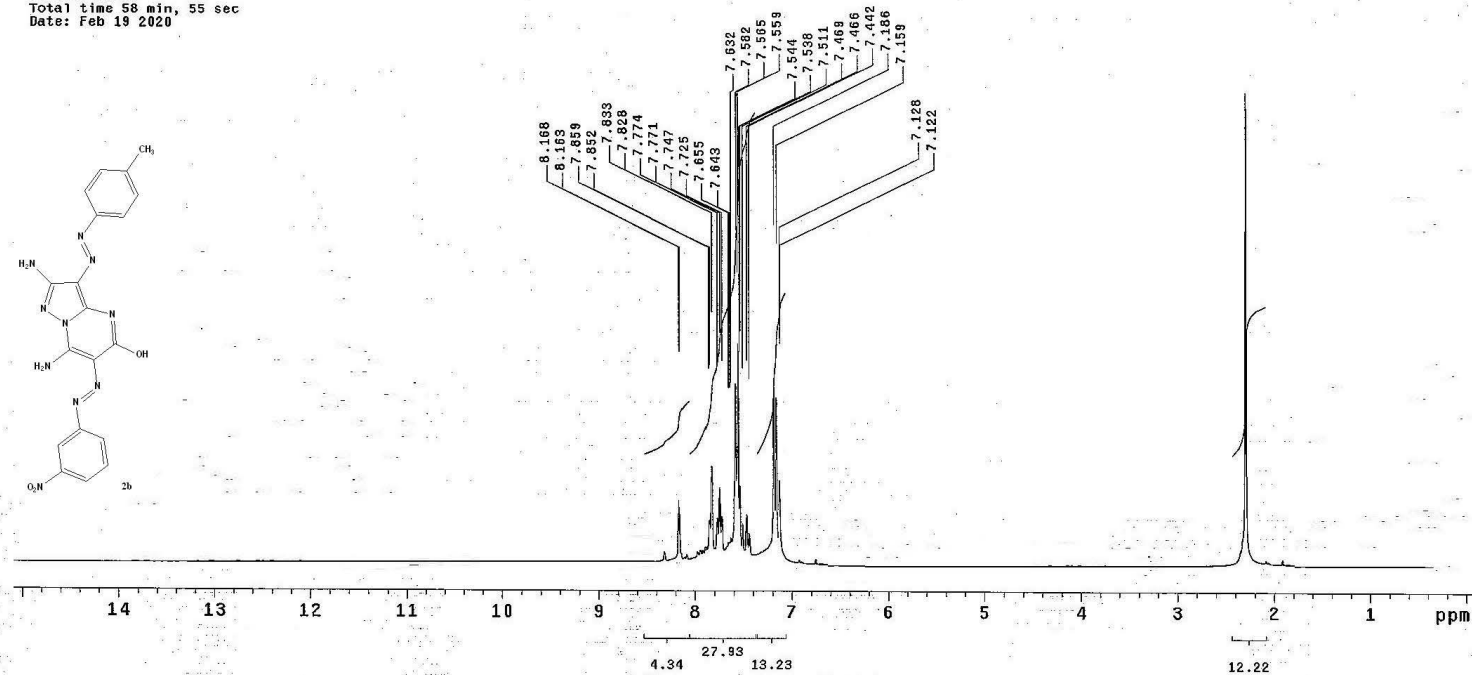

# <sup>13</sup>C-NMR spectrum of compound 2b

KerlessIkram-K6NEG-DMSO-C13

Archive directory: /export/home/vnmr1/vnmrsys/data  
Sample directory: D05mm\_test\_12Mar2014-21:34:40  
File: PROTON

Pulse Sequence: s2pu1

Solvent: DMSO  
Ambient temperature  
Mercury-300BB "NMR300"

Pulse 45.0 degrees  
Acq. time 1.707 sec  
Width 18761.7 Hz  
1312 repetitions  
OBSERVE C13, 75.4523885 MHz  
DECOUPLE H1, 300.0702830 MHz  
Power 34 dB  
continuously on  
WALTZ-16 modulated  
DATA PROCESSING  
Line broadening 1.0 Hz  
FT size 65536  
Total time 21 hr, 47 min, 2 sec  
Date: Feb 13 2020

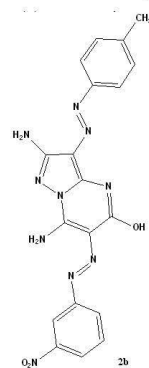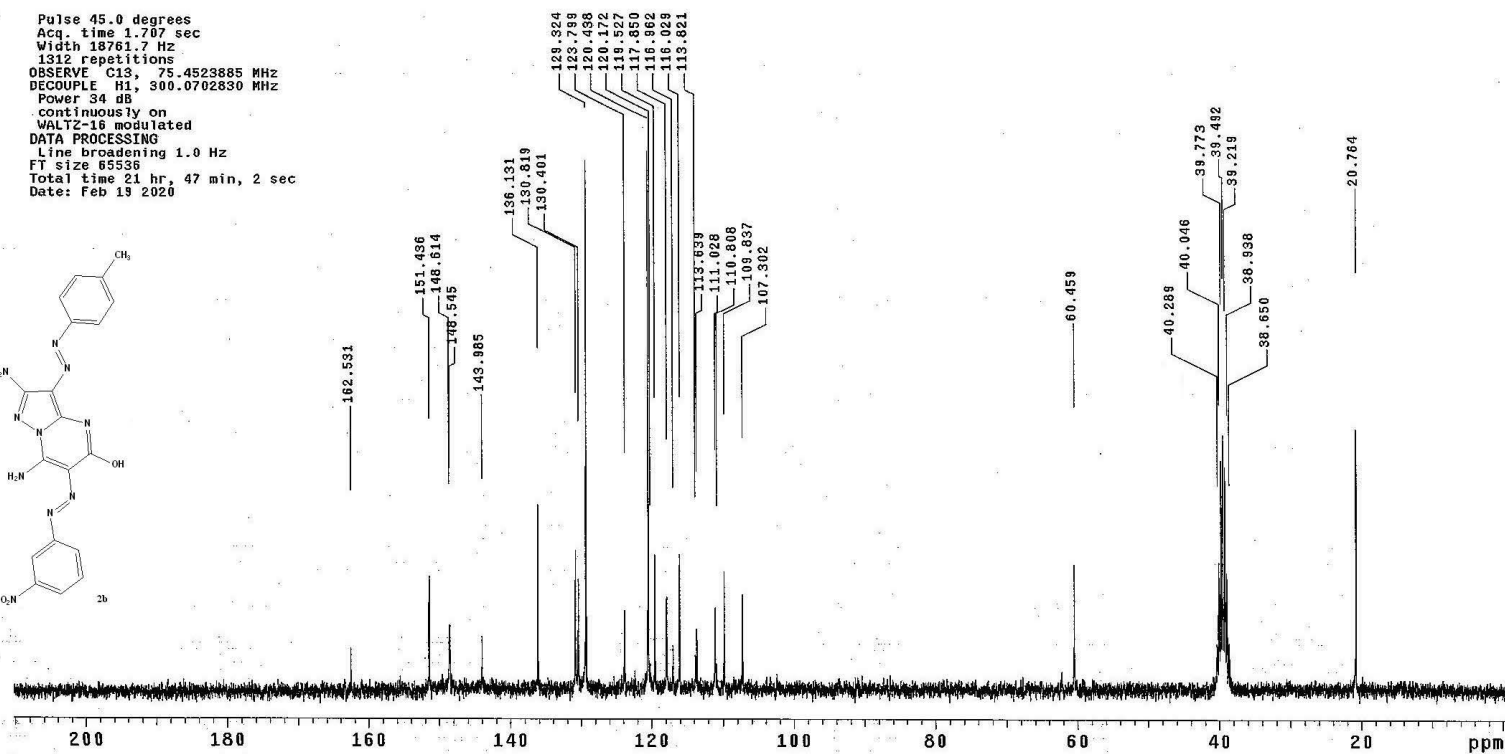

nshed-abd-elfattah-k6NEC #49 RT: 0.84 AV: 1 SB: 2 4.45, 4.45 NL: 3.53E2  
T: {0,0} + c EI Full ms [40.00-1000.00]

# mass spectrum of compound 2b

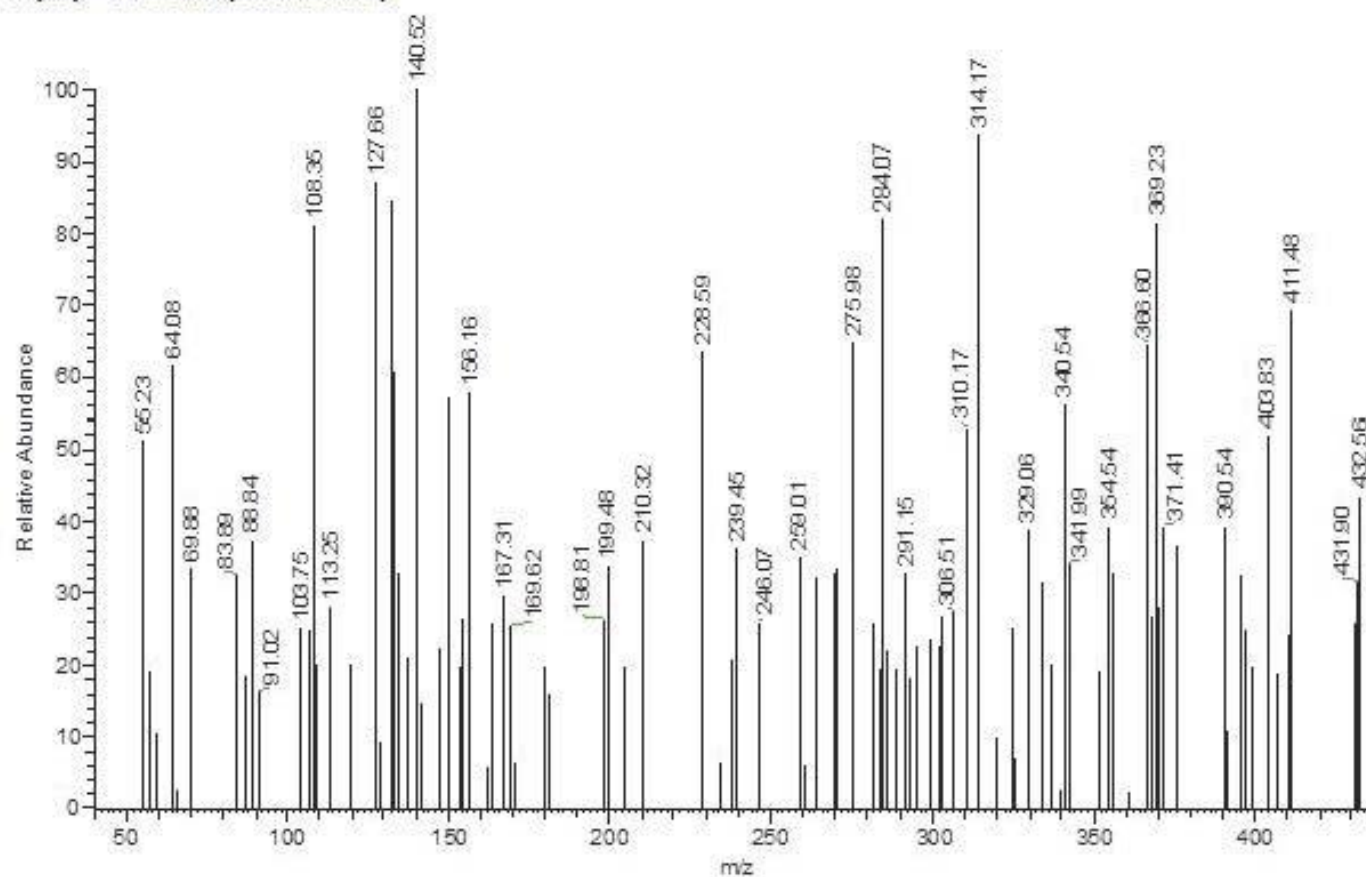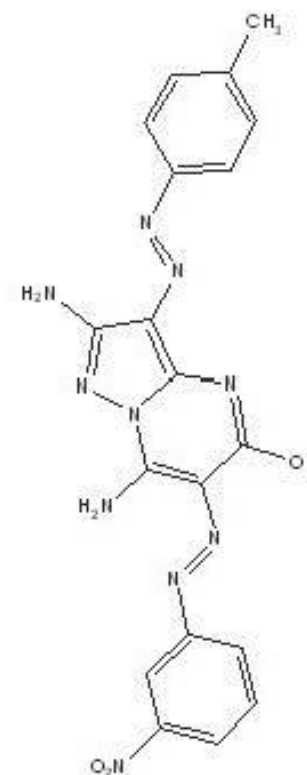



IR spectrum of compound 3a

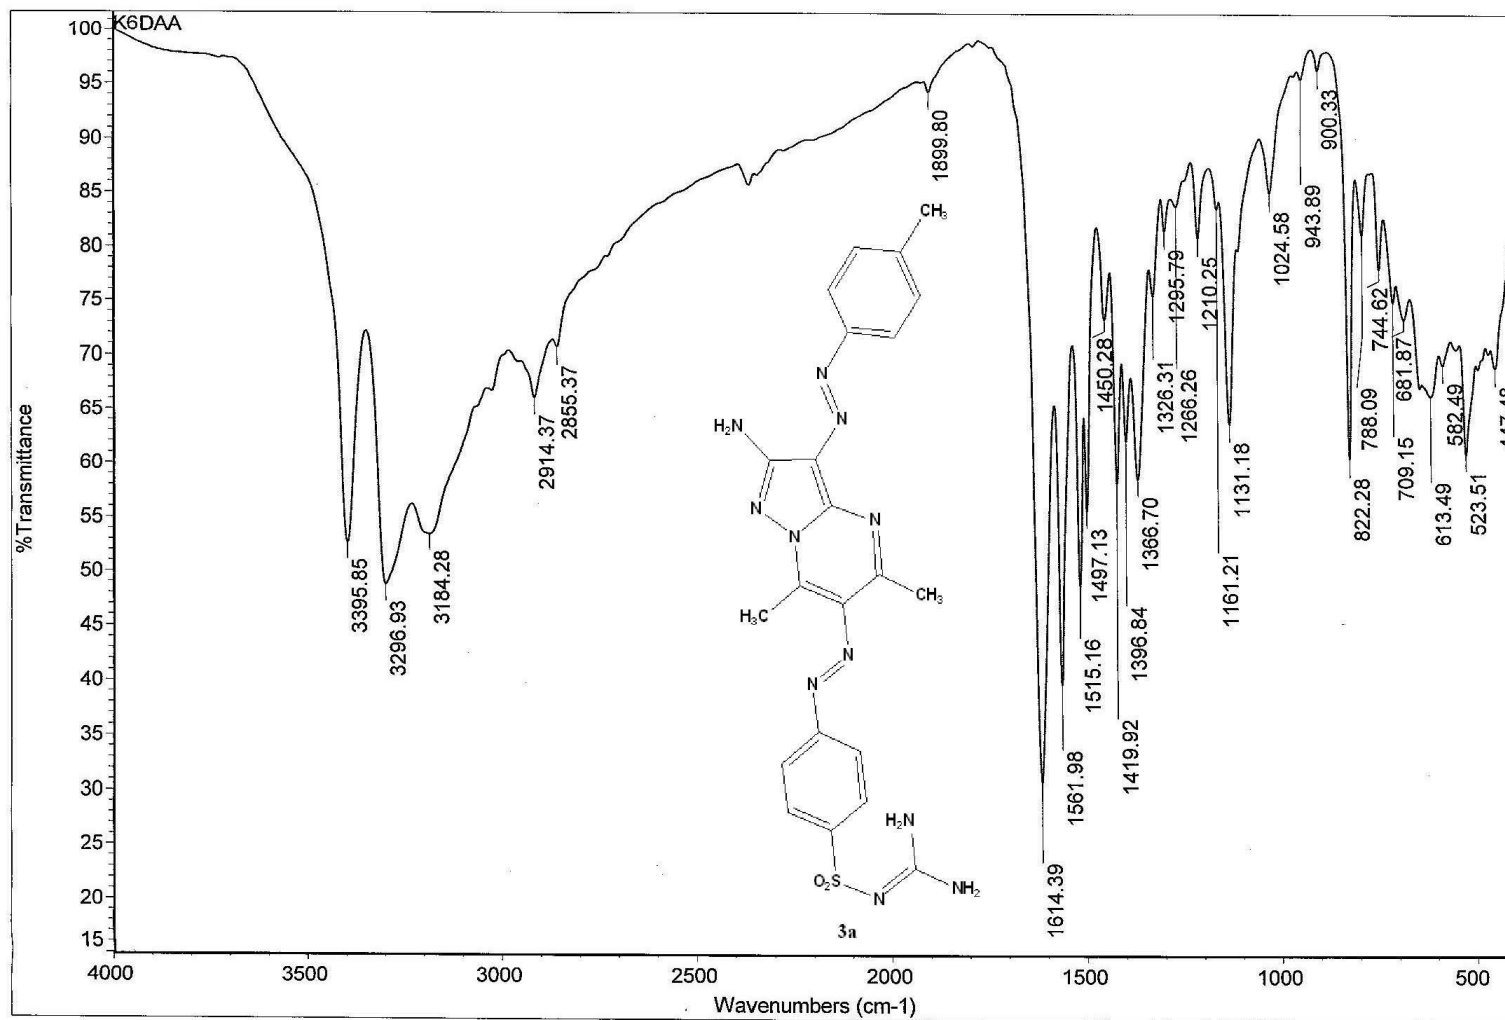

nahed-abb-elfattah-k6DAA #177 RT: 2.98 AV: 1 SB: 2 4.46 , 4.46 NL: 4.00E2  
T: {0,0} + e EI Full ms [40.00-1000.00]

# mass spectrum of compound 3a

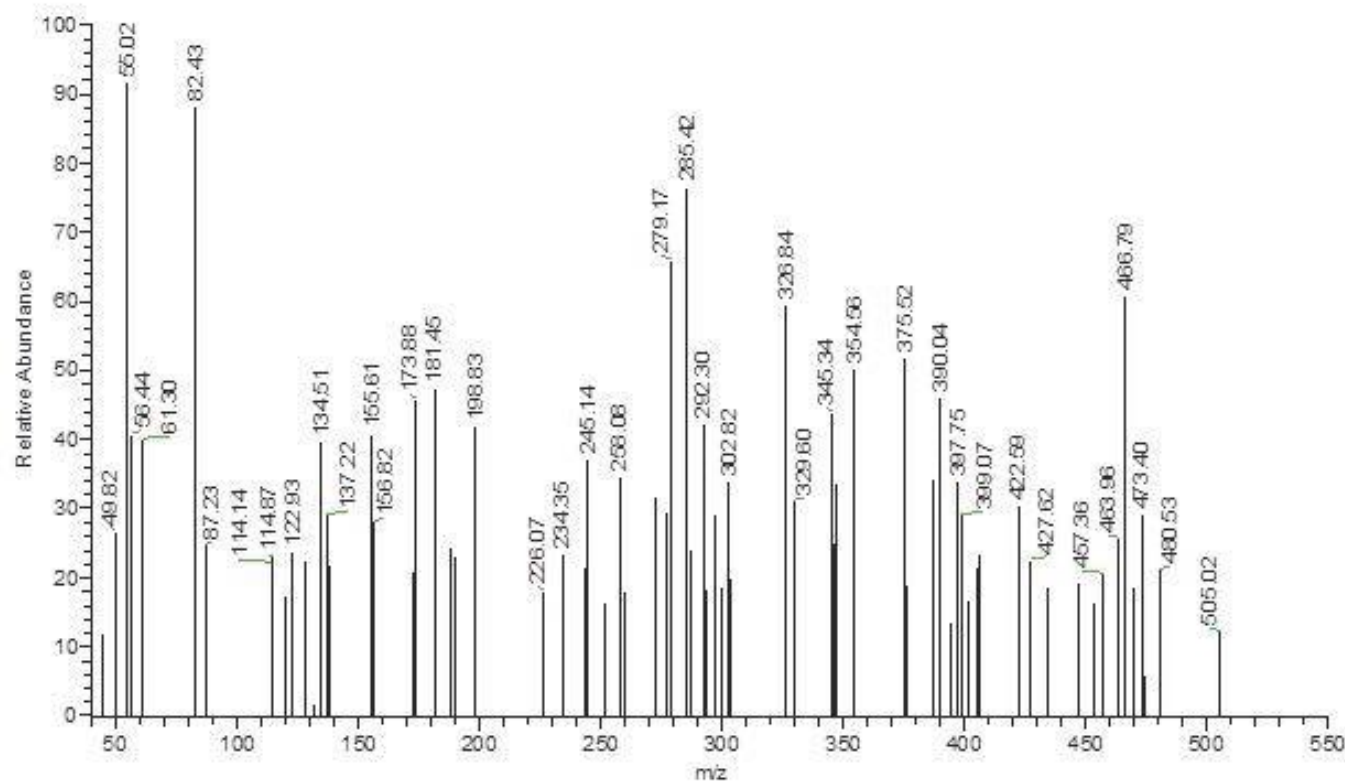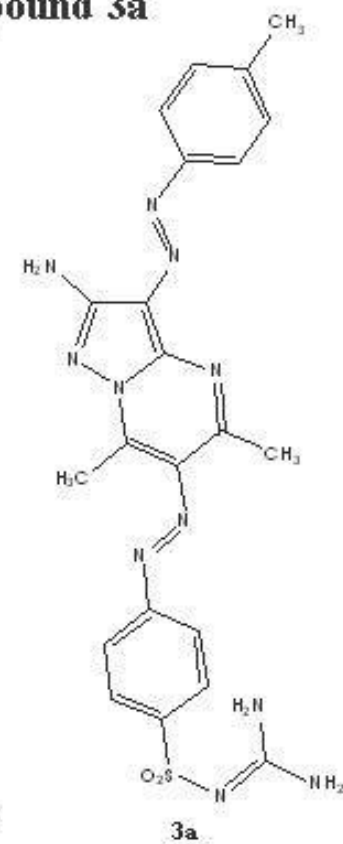

NAAK6.0

IR spectrum of compound 3b

10/31/2019

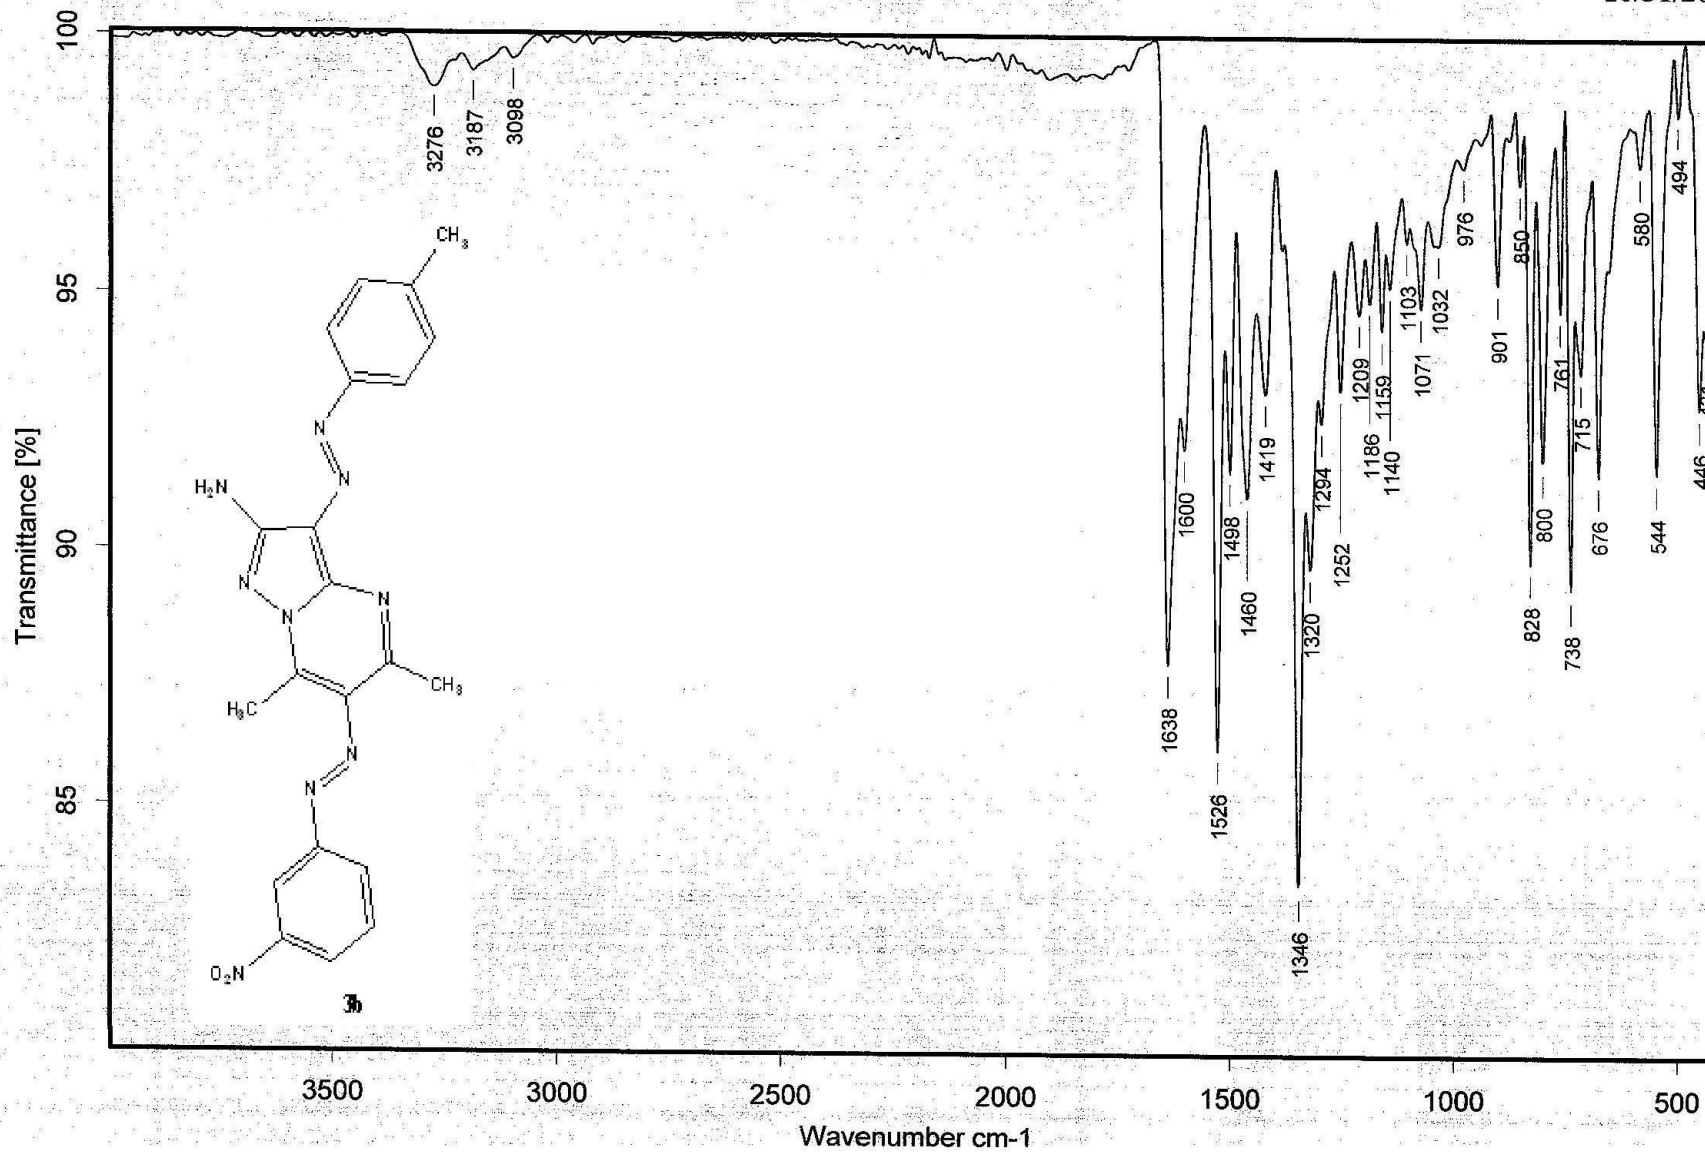

# <sup>1</sup>H-NMR spectrum of compound 3b

KerlessIkram-K6NAA-DMSO-H1

Archive directory: /export/home/vnmr1/vnmrsys/data  
Sample directory: DD5mm\_test\_12Mar2014-21:34:40  
File: PROTON

Pulse Sequence: s2pu1  
Solvent: DMSO  
Temp. 30.0 C / 303.1 K  
Mercury-300BB "NMR300"

Relax. delay 6.000 sec  
Pulse 45.0 degrees  
Acq. time 4.000 sec  
Width 6600.7 Hz  
7 repetitions  
OBSERVE H1, 300.0687871 MHz  
DATA PROCESSING  
Line broadening 0.2 Hz  
FT size 65536  
Total time 58 min, 55 sec  
Date: Feb 19 2020

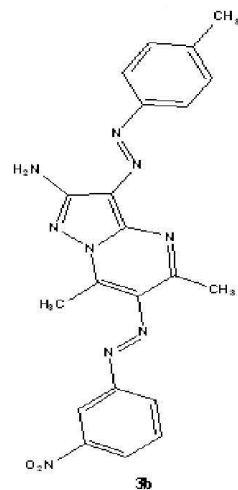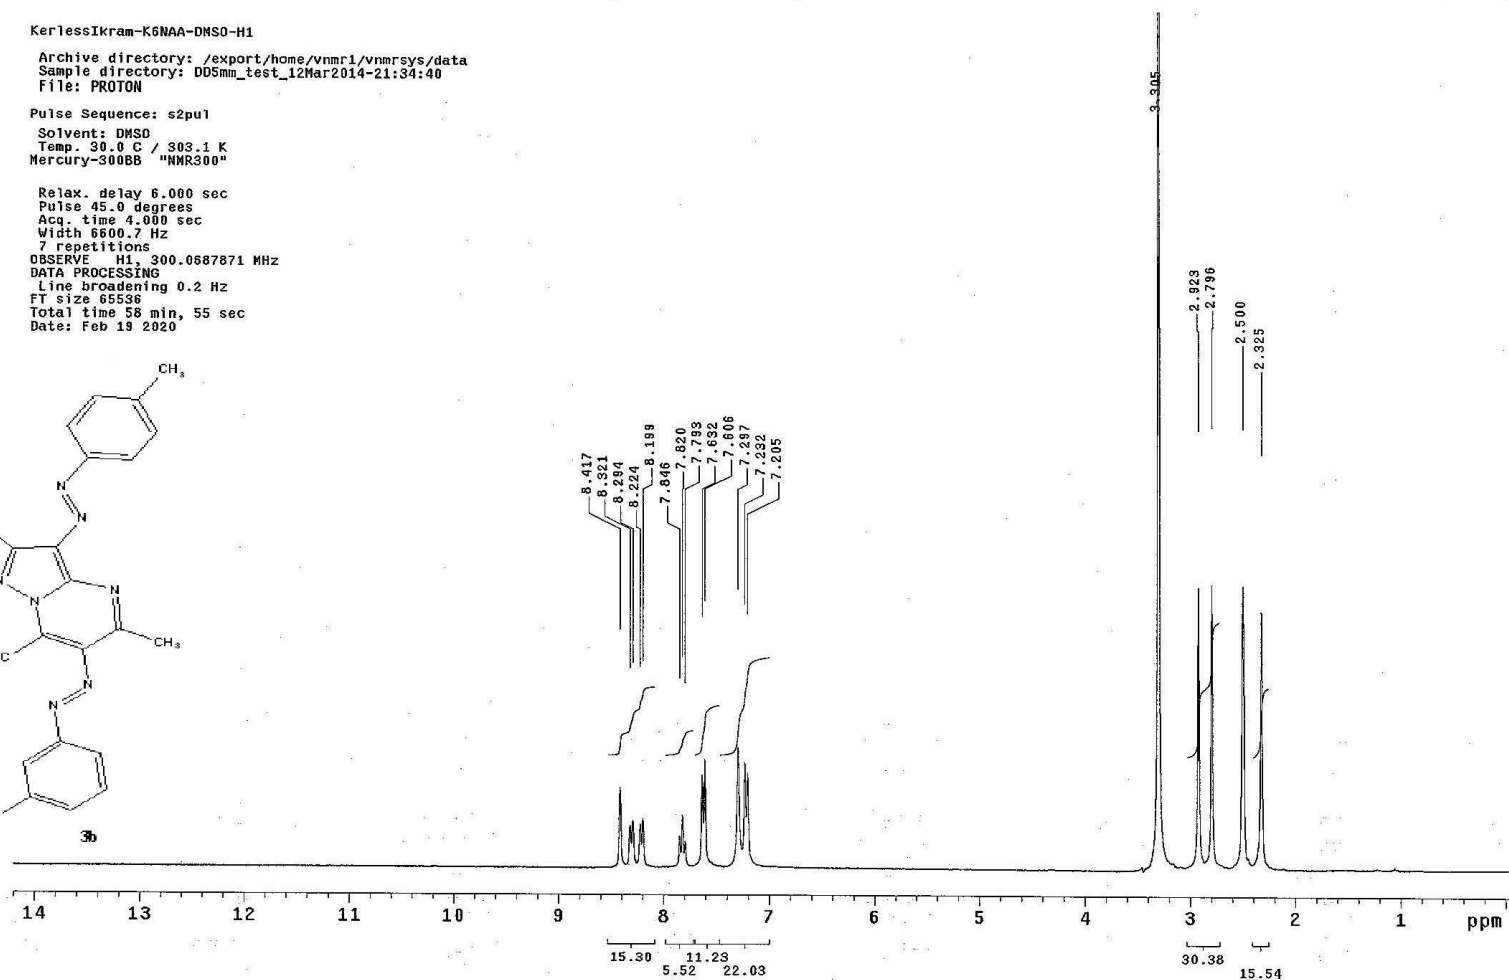

# **<sup>1</sup>H-NMR-D<sub>2</sub>O spectrum of compound 3b**

KerlexxIkram-K6NAA-DMSO-D<sub>2</sub>O-H1

Archive directory: /export/home/vnmr1/vnmrsys/data  
Sample directory: DD5mm\_test\_12Mar2014-21:34:40  
File: PROTON

Pulse Sequence: s2pu1  
Solvent: DMSO  
Temp. 30.0 C / 303.1 K  
Mercury-300BB "NMR300"

Relax. delay 6.000 sec  
Pulse 45.0 degrees  
Acq. time 4.000 sec  
Width 6600.7 Hz  
3 repetitions  
OBSERVE H1, 300.0687671 MHz  
DATA PROCESSING  
Line broadening 0.2 Hz  
FT size 65536  
Total time 58 min, 55 sec  
Date: Feb 19 2020

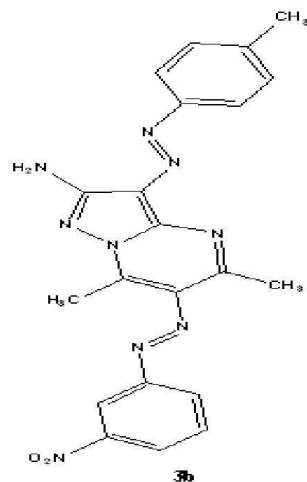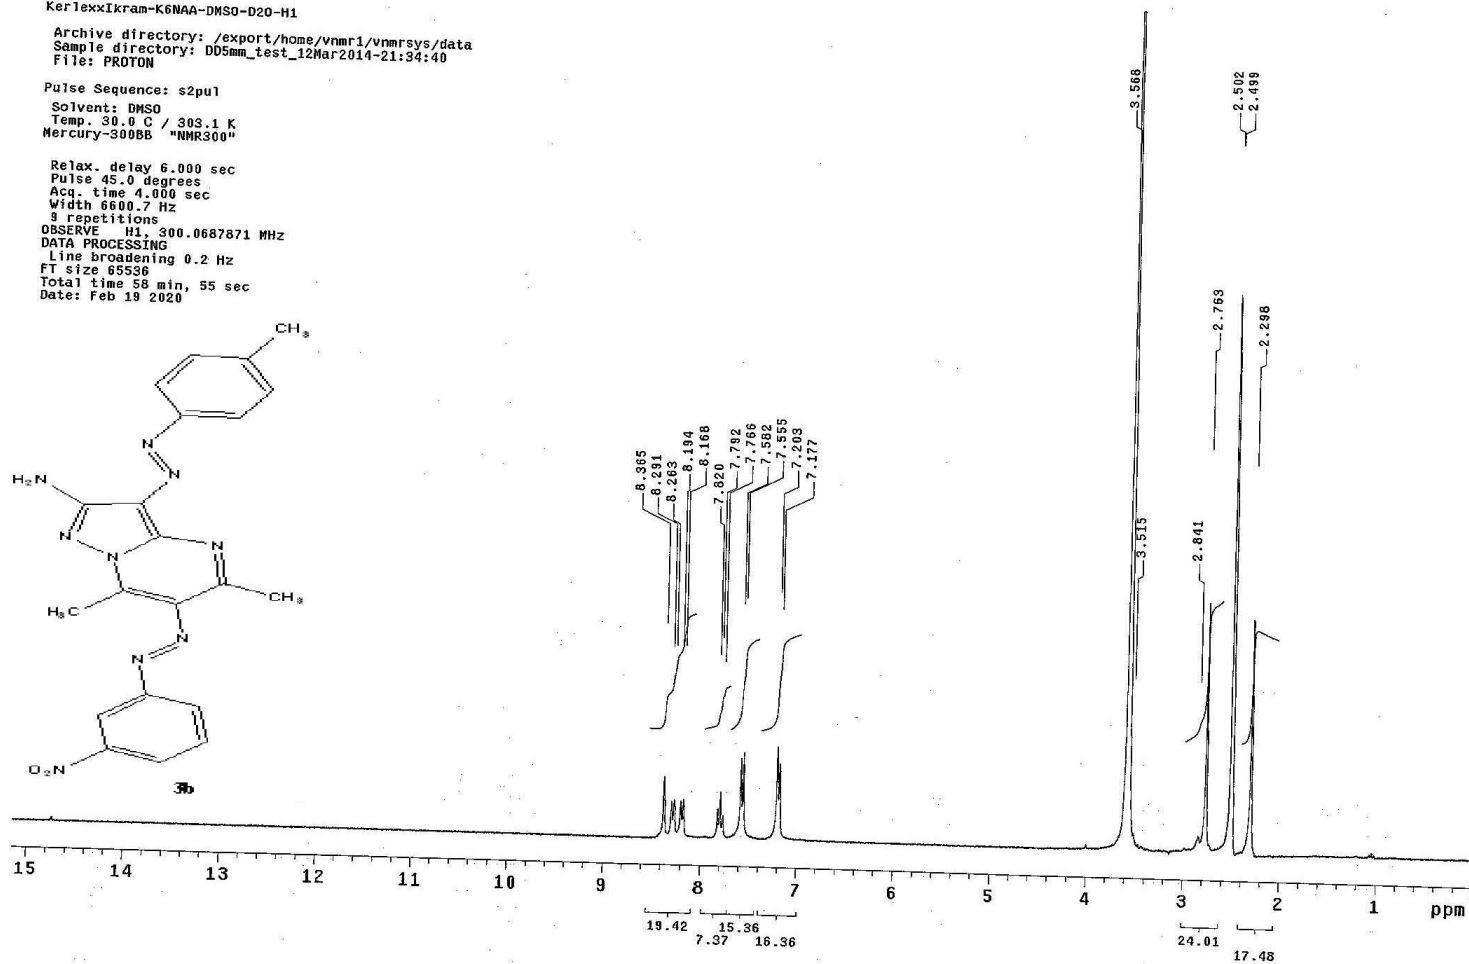

# **<sup>13</sup>C-NMR spectrum of compound 3b**

KerlessIkram-K6NAA-DMSO-C13

Archive directory: /export/home/vnmr1/vnmrsys/data  
Sample directory: DD5mm\_test\_12Mar2014-21:34:40  
File: PROTON

Pulse Sequence: s2pu1  
Solvent: DMSO  
Ambient temperature  
Mercury-300BB "NMR300"

Pulse 45.0 degrees  
Acq. time 1.787 sec  
Width 18761.7 Hz  
1312 repetitions  
OBSERVE C13, 75.4523885 MHz  
DECOUPLE H1, 300.0702830 MHz  
Power 34 dB  
Continuously on  
WALTZ-16 modulated  
DATA PROCESSING  
Line broadening 1.0 Hz  
FT size 65536  
Total time 21 hr, 47 min, 2 sec  
Date: Feb 19 2020

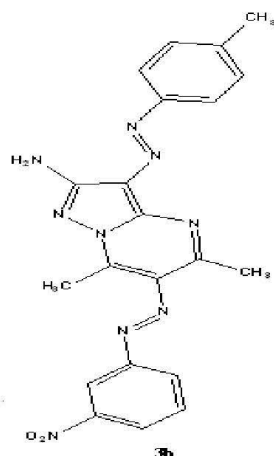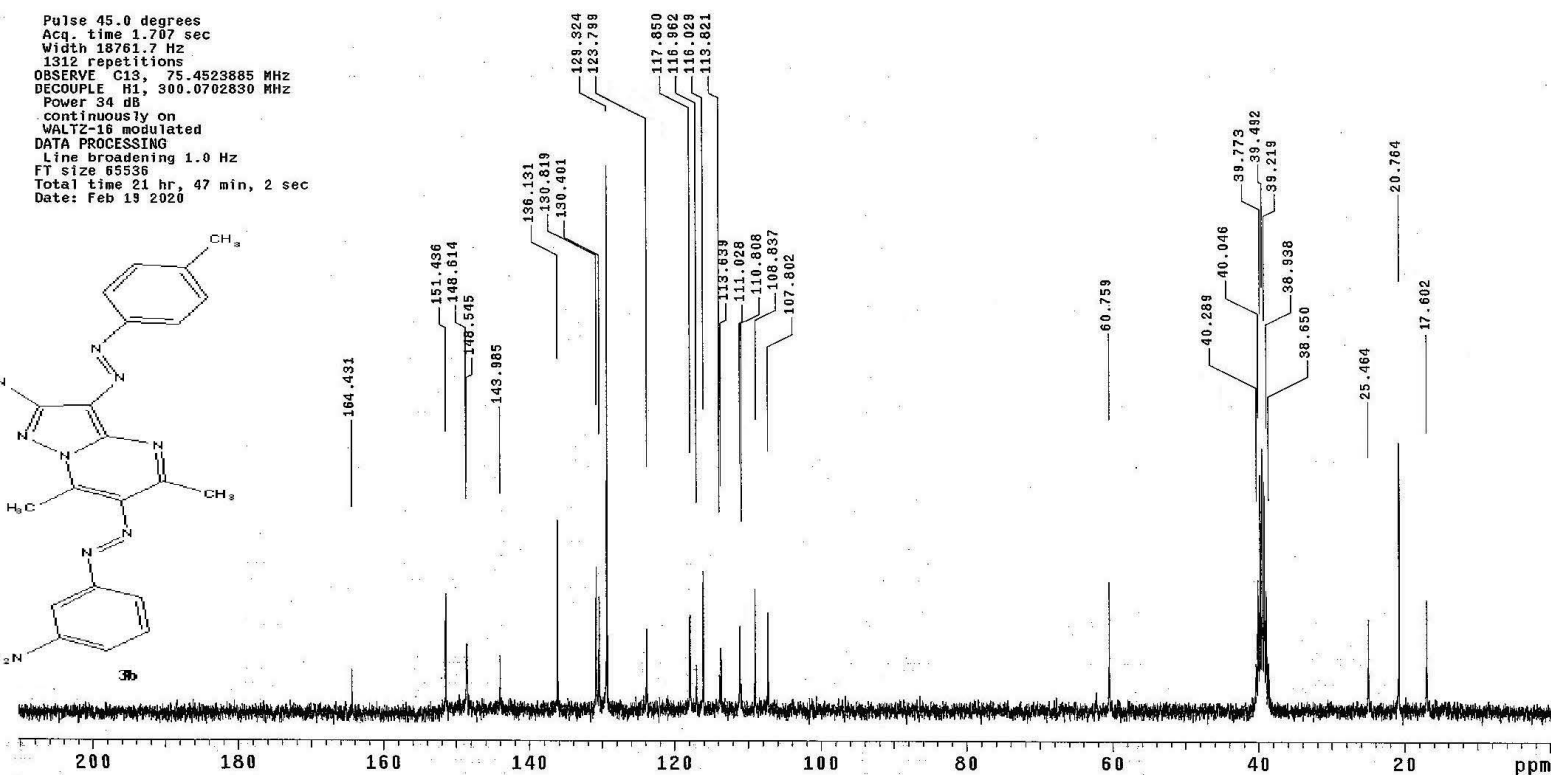

nshed-abd-elfattah-k6NAA #237 RT: 3.98 AV: 1 SB: 2 4.45, 4.45 NL: 8.82E2  
T: {0,0} + c EI Full ms [40.00-1000.00]

# mass spectrum of compound 3b

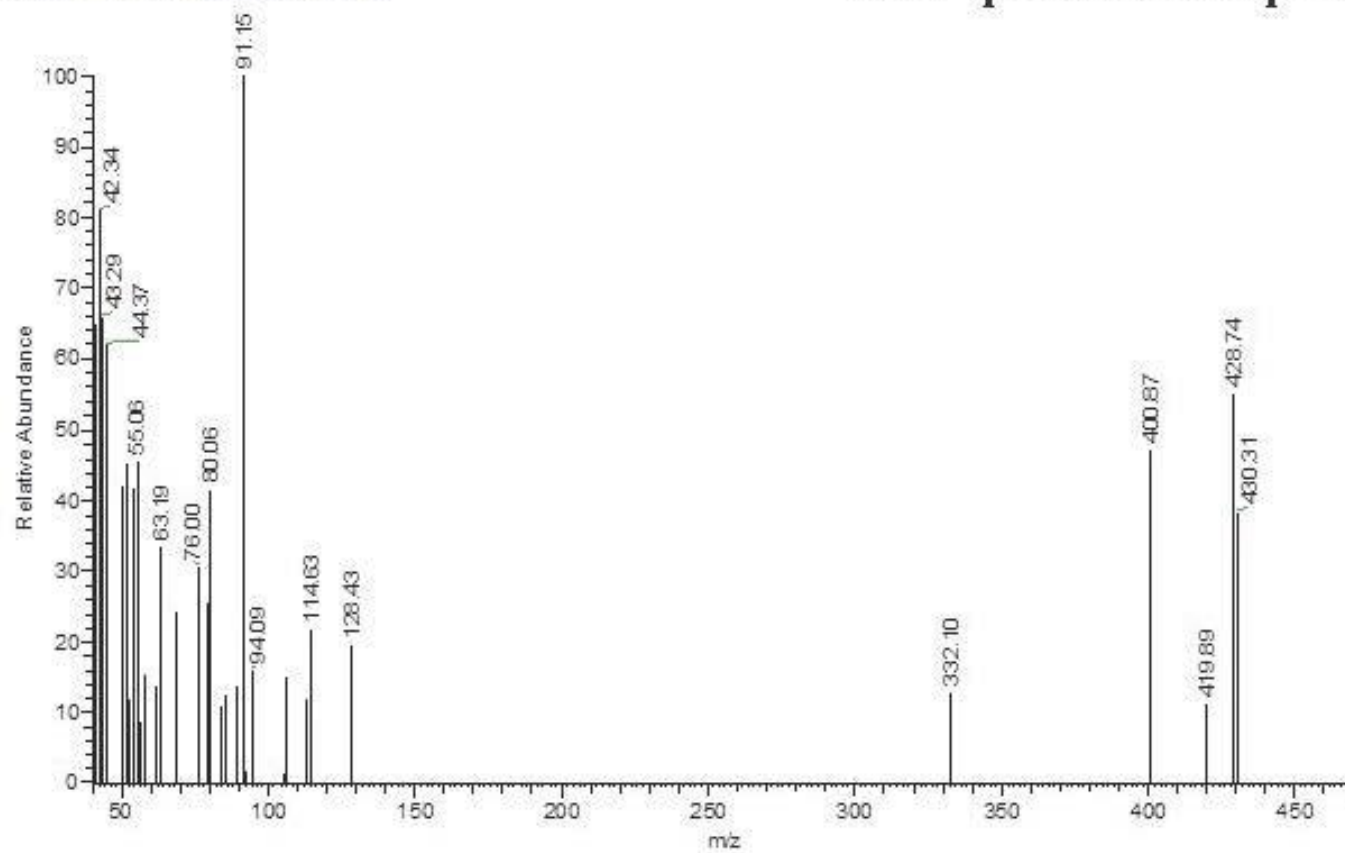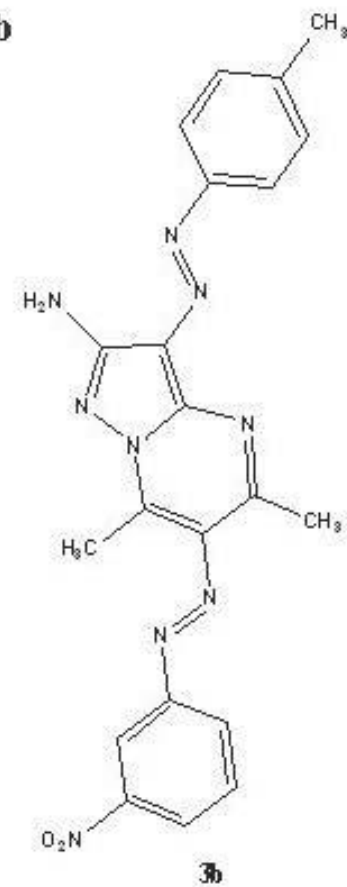

IR spectrum of compound 4a

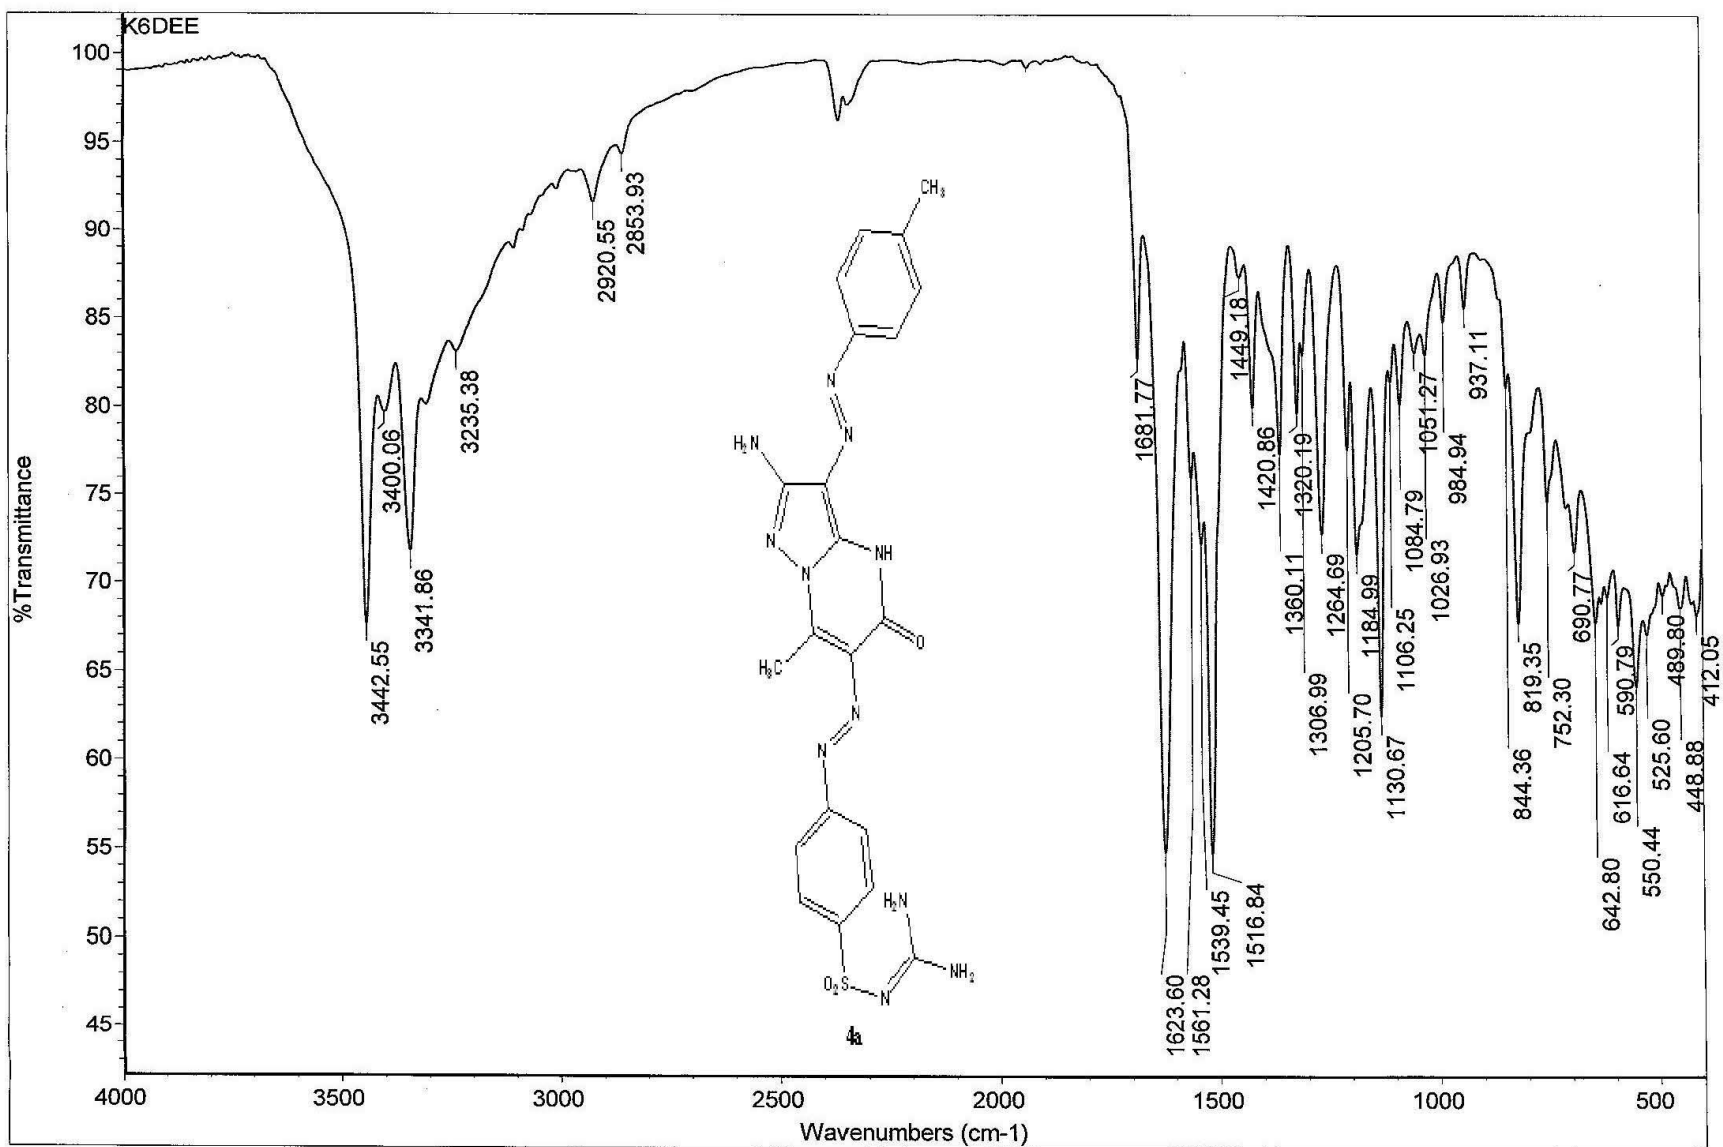



nahed-abd-elfattah-k6DEE #195 RT: 3.28 AV: 1 SB: 2 4.45, 4.46 NL: 3.18E3  
T: {0,0} + e EI Full ms [40.00-1000.00]

# mass spectrum of compound 4a

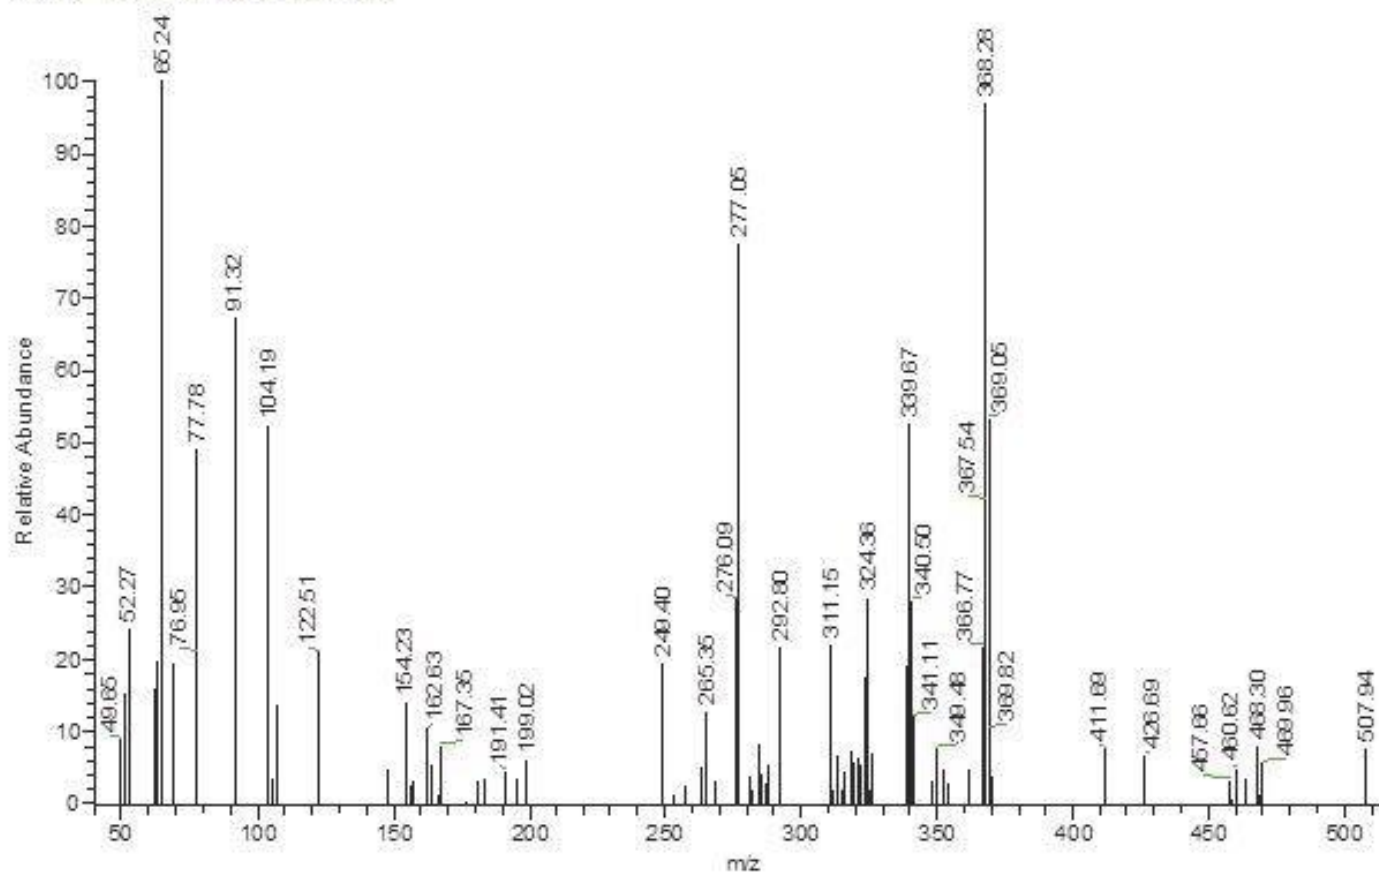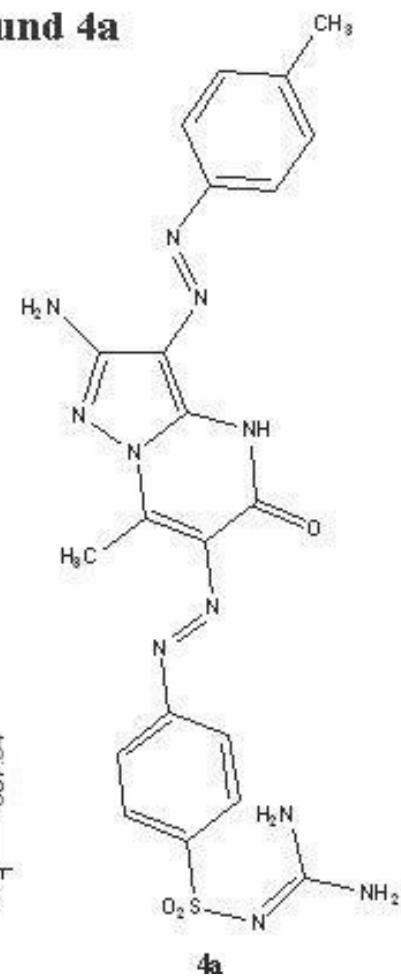

NEEK6.0

IR spectrum of compound 4b

10/22/2019

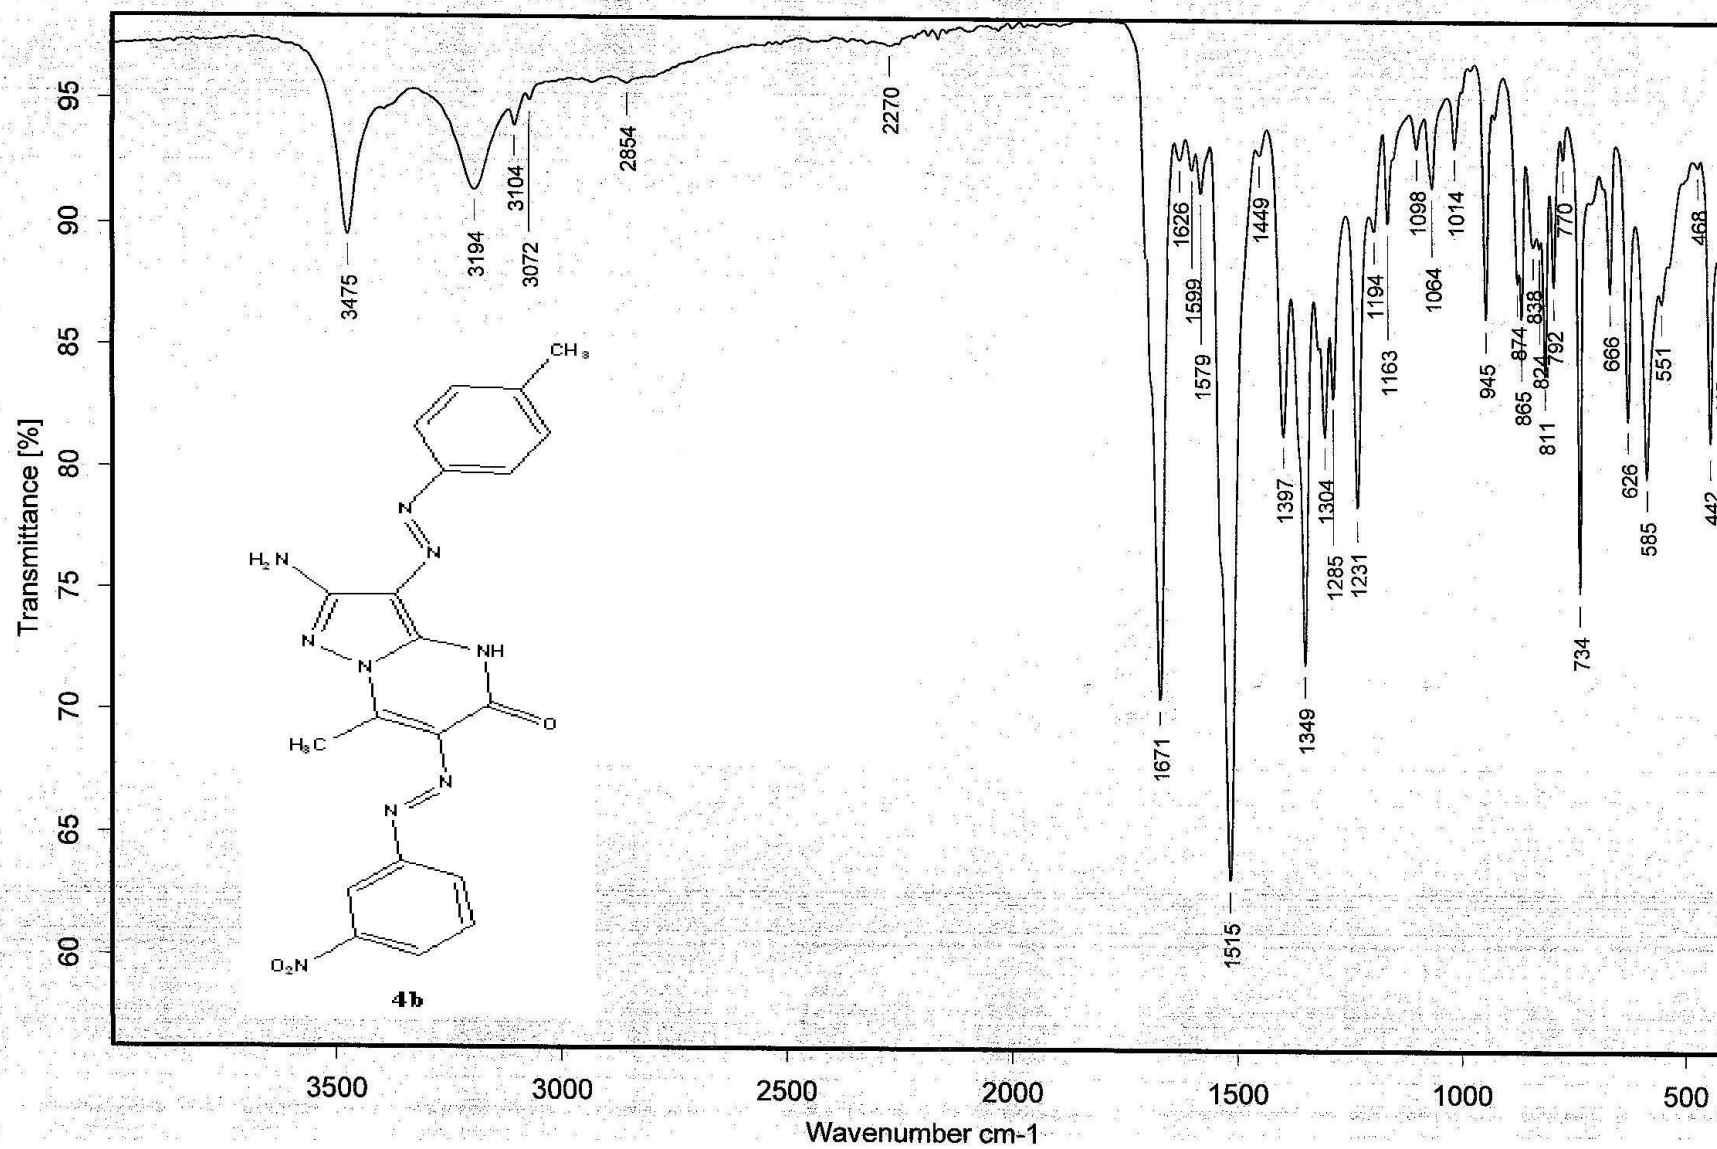

# <sup>1</sup>H-NMR spectrum of compound 4b

KerlessIkram-K6NEE-DMSO-H1

Archive directory: /export/home/vnmr1/vnmrsys/data  
Sample directory: D05mm\_test\_12Mar2014-21:34:40  
File: PROTON

Pulse Sequence: s2pu1

Solvent: DMSO  
Temp. 30.0 C / 303.1 K  
Mercury-300BB "NMR300"

Relax. delay 6.000 sec  
Pulse 45.0 degrees  
Acq. time 4.000 sec  
Width 6600.7 Hz  
19 repetitions  
OBSERVE H1, 300.0687871 MHz  
DATA PROCESSING  
Line broadening 0.2 Hz  
FT size 65536  
Total time 58 min, 55 sec  
Date: Feb 19 2020

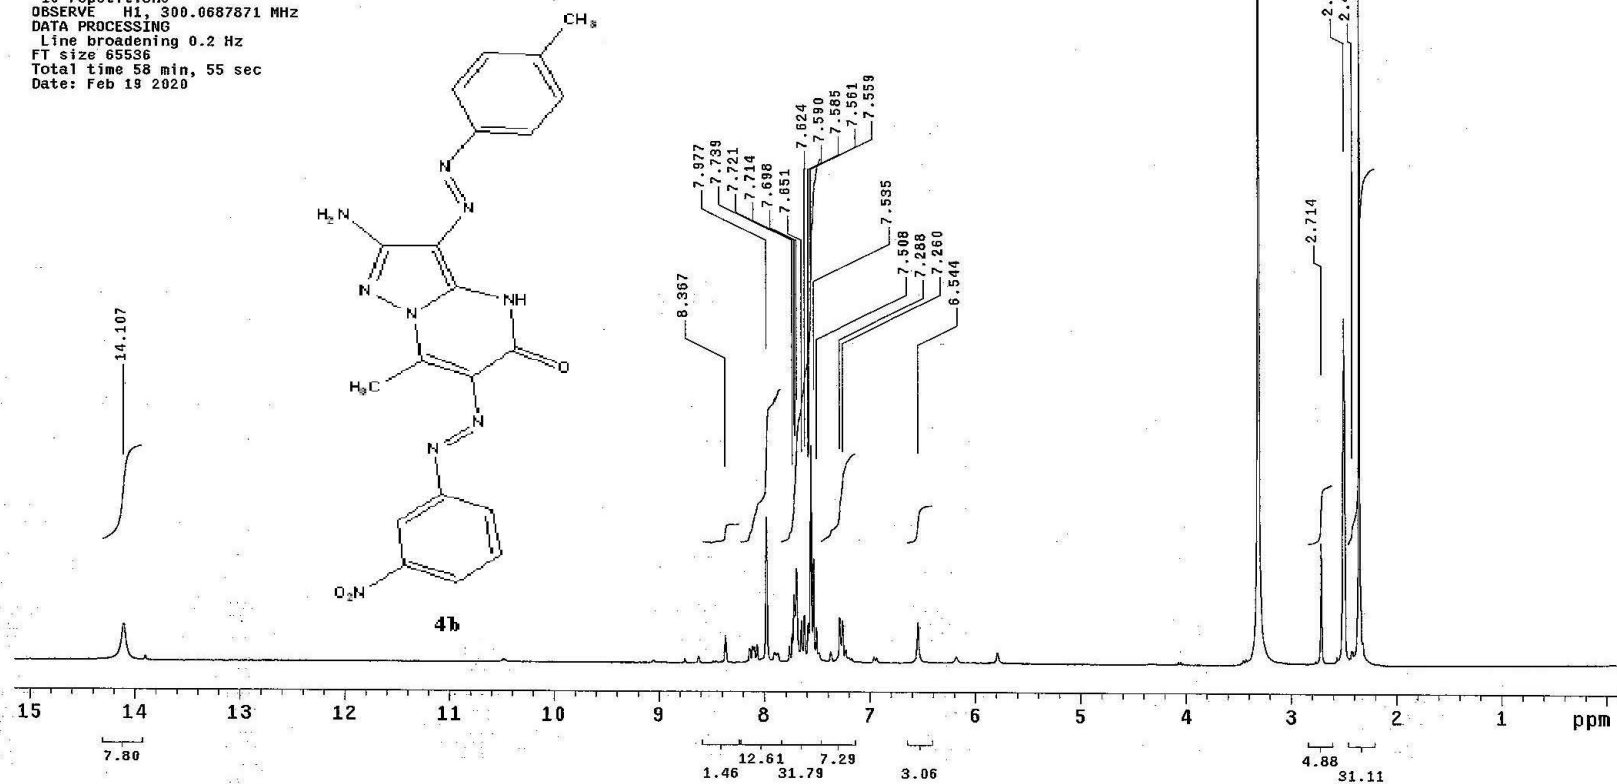

# **<sup>1</sup>H-NMR-D<sub>2</sub>O spectrum of compound 4b**

KerlexxIkram-K6NEE-DMSO-D2O-H1

Archive directory: /export/home/vnmr1/vnmrsys/data  
Sample directory: DD5mm\_test\_12Mar2014-21:34:40  
File: PROTON

Pulse Sequence: s2pu1

Solvent: DMSO  
Temp. 30.0 C / 303.1 K  
Mercury-300BB "NMR300"

Relax. delay 6.000 sec  
Pulse 45.0 degrees  
Acq. time 4.000 sec  
Width 6600.7 Hz  
10 repetitions  
OBSERVE H1, 300.0687871 MHz  
DATA PROCESSING  
Line broadening 0.2 Hz  
FT size 65536  
Total time 58 min, 55 sec  
Date: Feb 19 2020

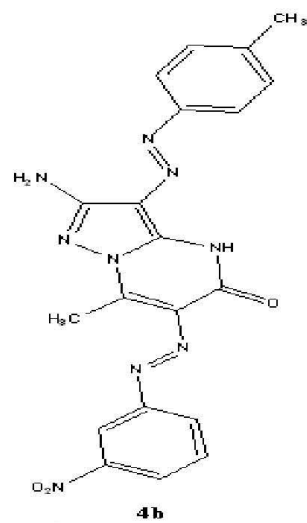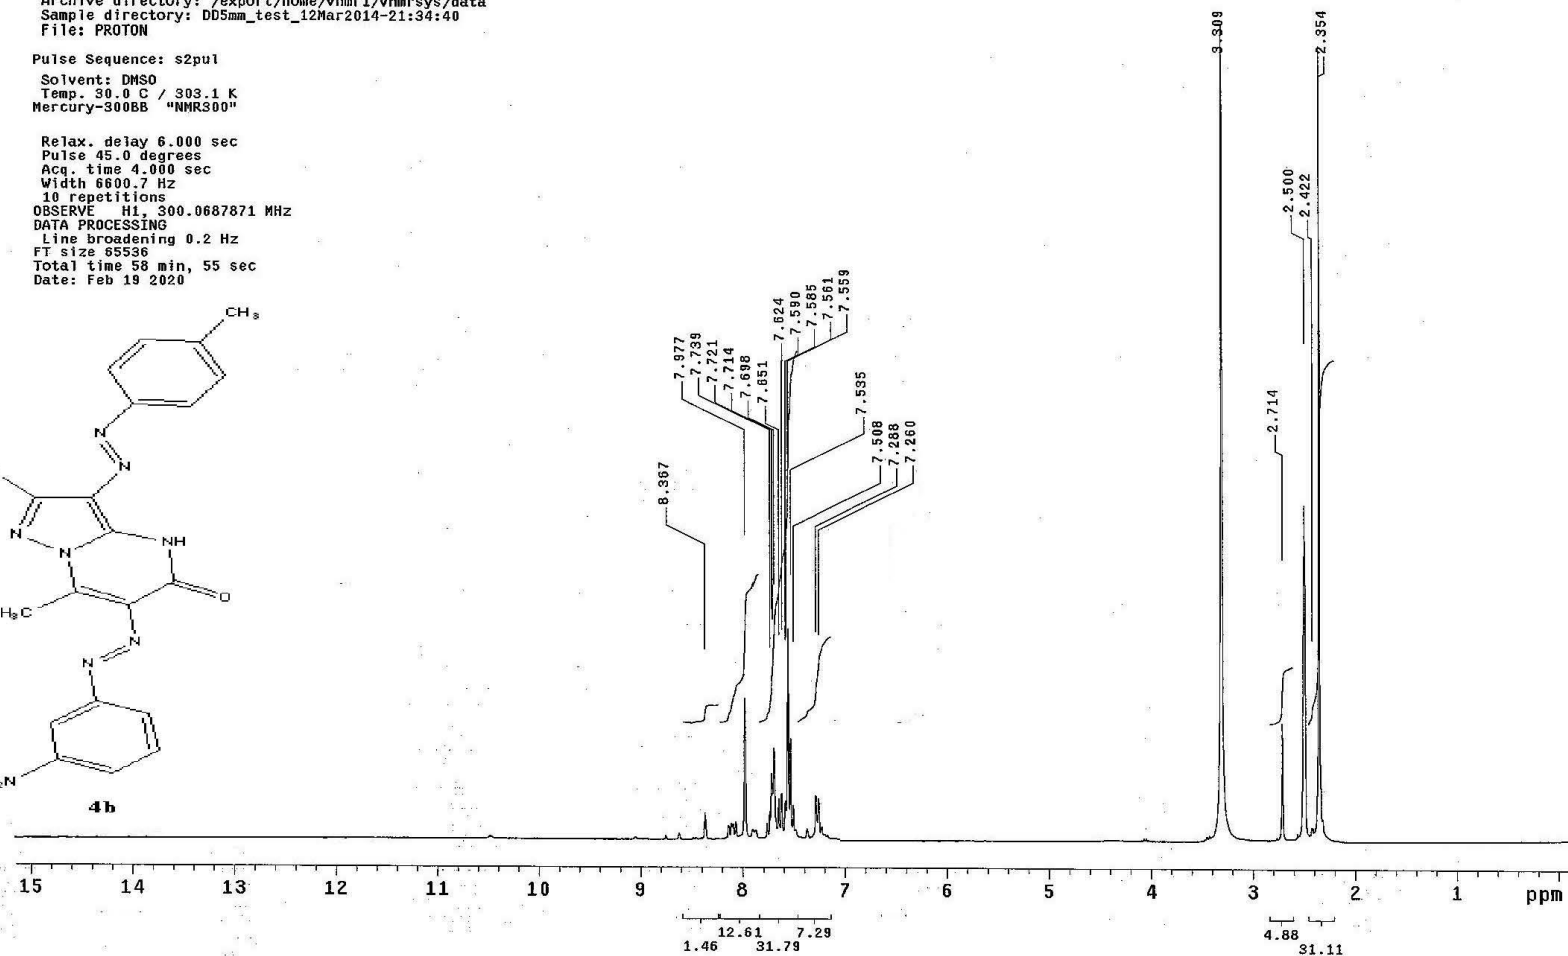

# **<sup>13</sup>C-NMR spectrum of compound 4b**

KerlessIkram-K6NEE-DMSO-C13

Archive directory: /export/home/vnmr1/vnmrsys/data  
Sample directory: DD5mm\_test\_12Mar2014-21:34:40  
File: PROTON

Pulse Sequence: s2pu1

Solvent: DMSO  
Ambient temperature  
Mercury-300BB "NMR300"

Pulse 45.0 degrees  
Acq. time 1.787 sec  
Width 18761.7 Hz  
2640 repetitions  
OBSERVE C13, 75.4523885 MHz  
DECOUPLE H1, 300.0702830 MHz  
Power 34 dB  
continuously on  
WALTZ-16 modulated  
DATA PROCESSING  
Line broadening 1.0 Hz  
FT size 65536  
Total time 21 hr, 47 min, 2 sec  
Date: Feb 19 2020

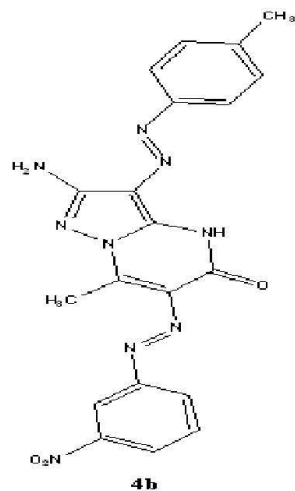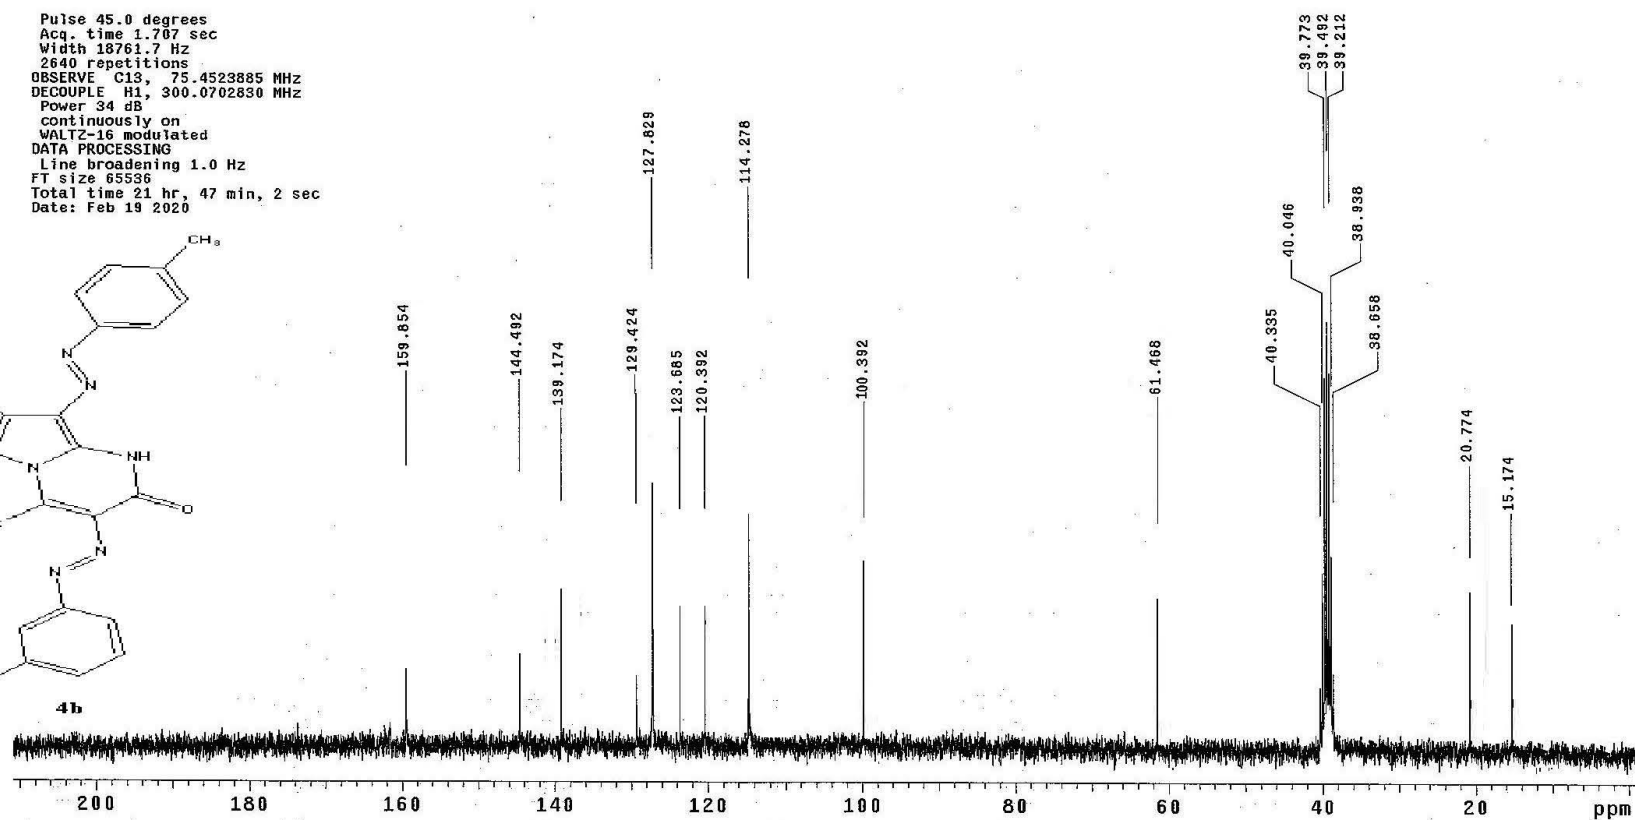

nahed-abd-elfattah-k8-nee #256 RT: 4.30 AV: 1 SB: 2 4.45, 4.45 NL: 3.49E2  
T: (0,0) + c EI Full ms [40.00-1000.00]

# mass spectrum of compound 4b

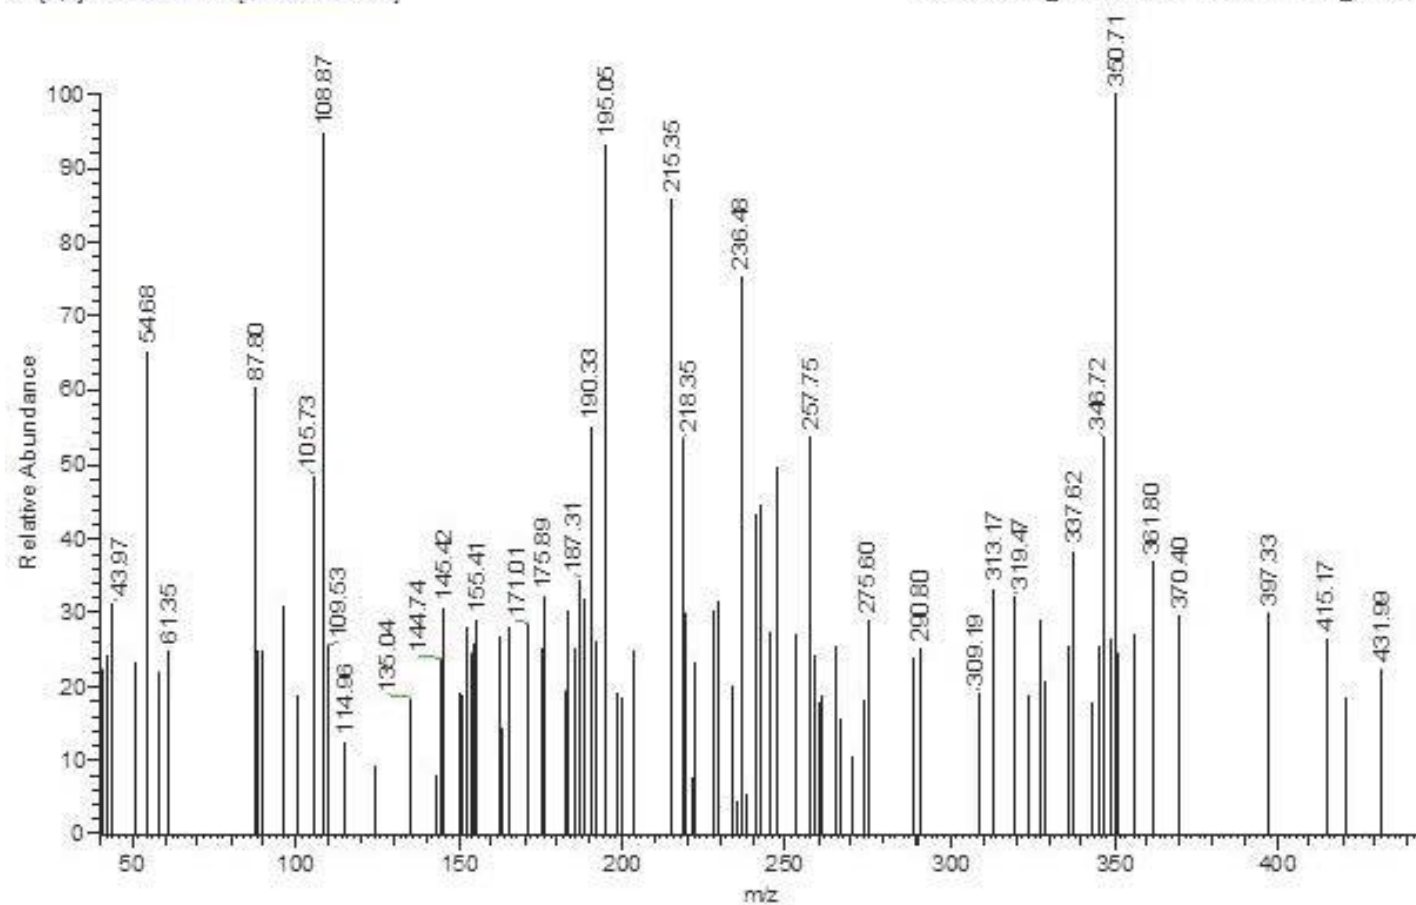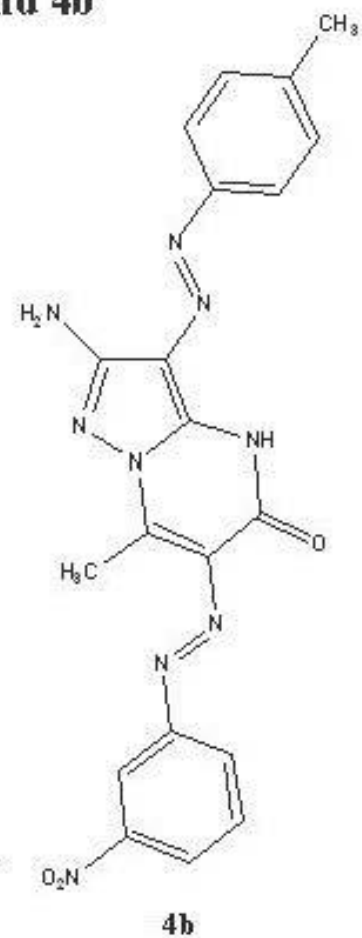

K6DEM.1

IR spectrum of compound 5

1/5/2020

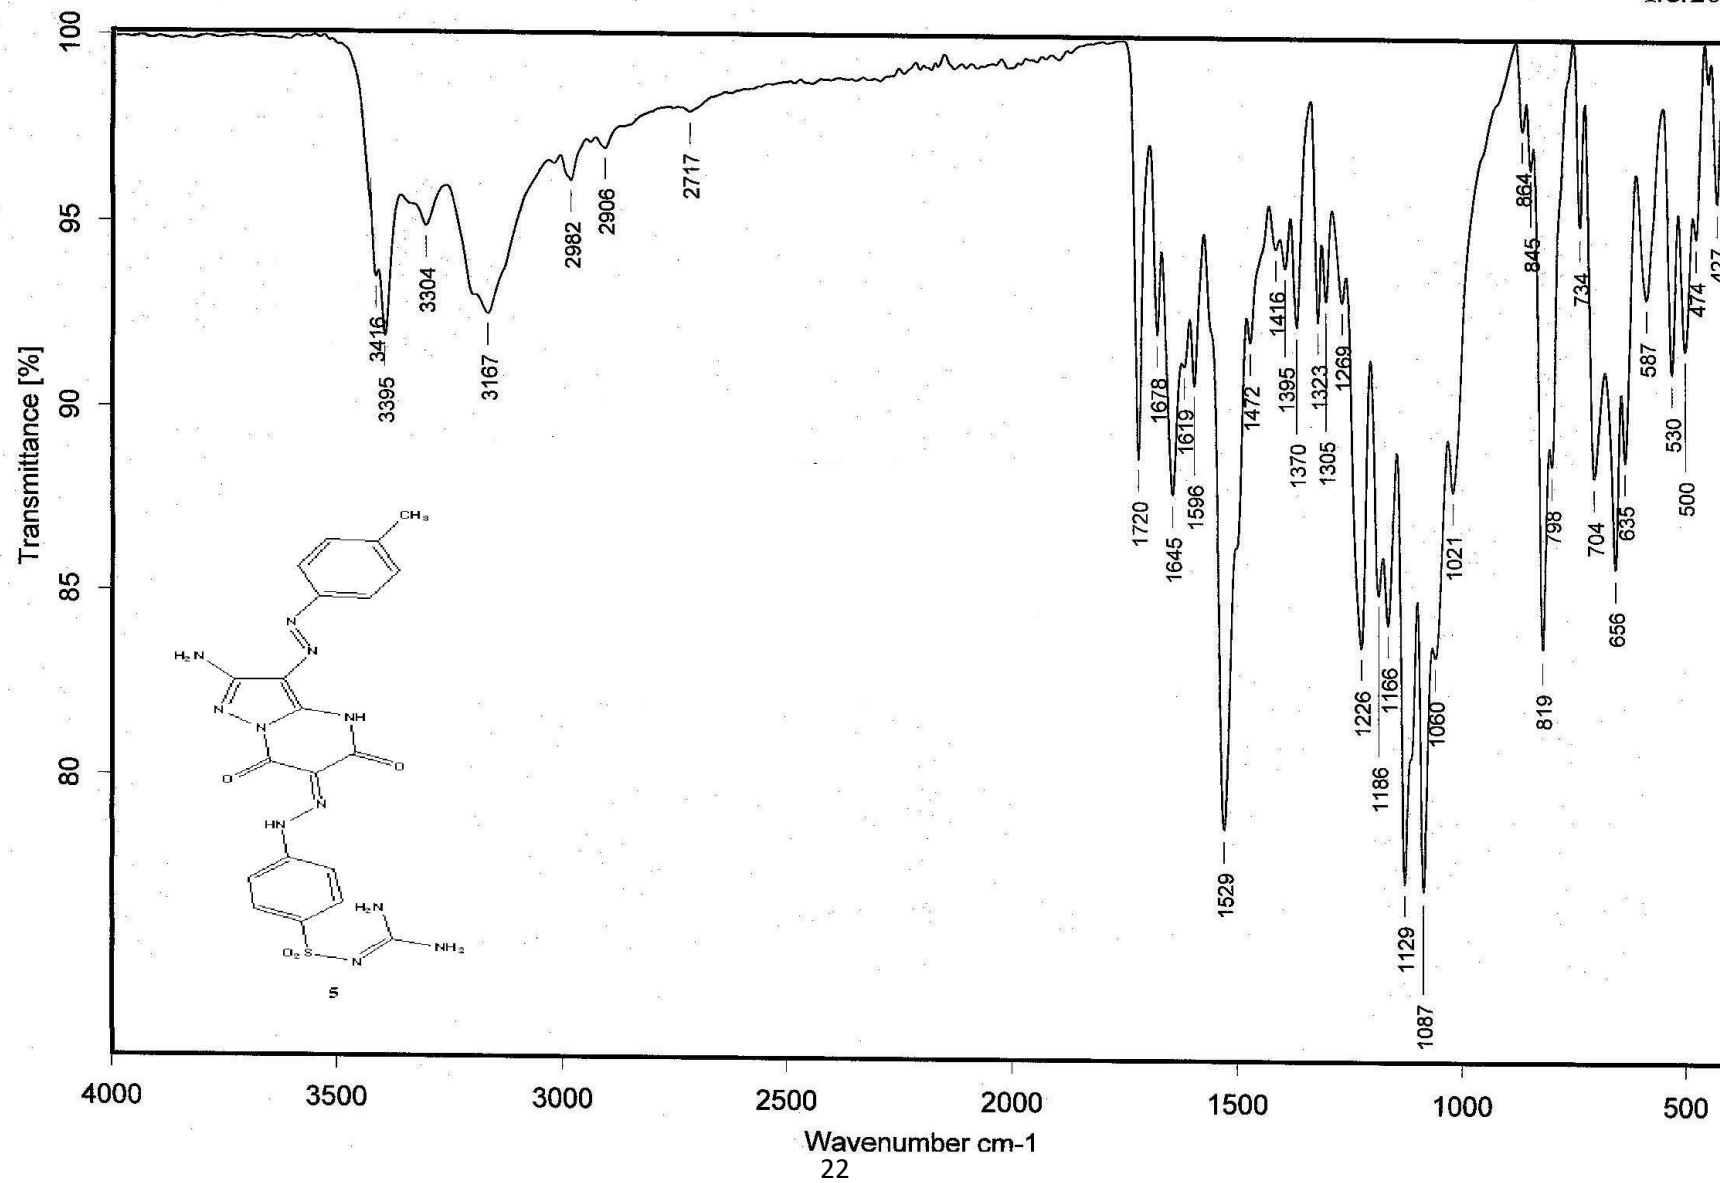

# **<sup>1</sup>H-NMR spectrum of compound 5**

KerlessIkram-K6DEM-DMSO-H1

Archive directory: /export/home/vnmr1/vnmrsys/data  
Sample directory: DD5mm\_test\_12Mar2014-21:34:40  
File: PROTON

Pulse Sequence: s2pu1

Solvent: DMSO  
Temp. 30.0 C / 303.1 K  
Mercury-300BB "NMRS00"

Relax. delay 6.000 sec  
Pulse 45.0 degrees  
Acq. time 4.000 sec  
Width 6600.7 Hz  
35 repetitions  
OBSERVE H1, 300.0687871 MHz  
DATA PROCESSING  
FT size 65536  
Total time 58 min, 55 sec  
Date: Feb 19 2020

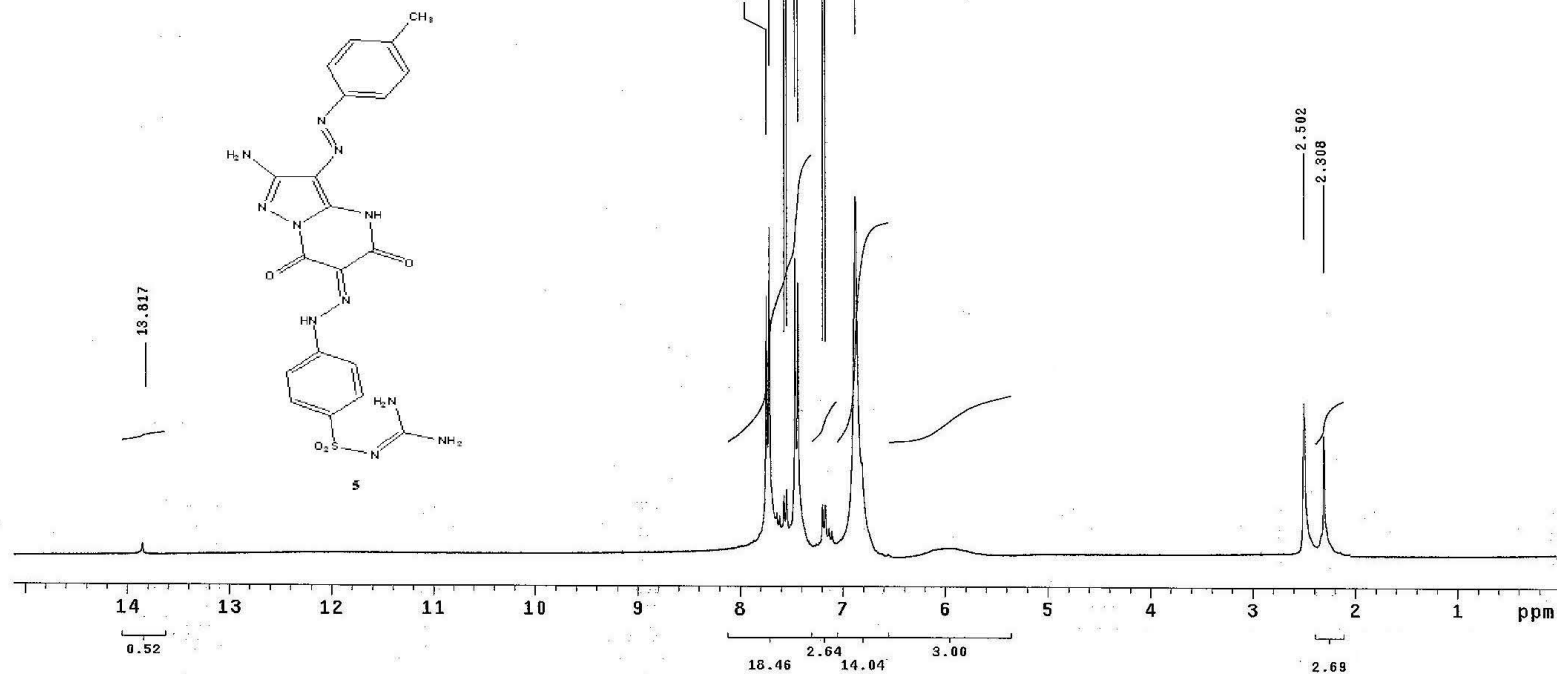



# **<sup>1</sup>H-NMR-D2O spectrum of compound 5**

KerlessIkram-K6DEM-DMSO-D2O-H1

Archive directory: /export/home/vnmr1/vnmrsys/data  
Sample directory: DD5mm\_test\_12Mar2014-21:34:40  
File: PROTON

Pulse Sequence: s2pu1

Solvent: DMSO  
Temp. 30.0 C / 303.1 K  
Mercury-300BB "NMR300"

Relax. delay 6.000 sec  
Pulse 45.0 degrees  
Acq. time 4.000 sec  
Width 6600.7 Hz  
11 repetitions  
OBSERVE H1, 300.0687871 MHz  
DATA PROCESSING  
FT size 65536  
Total time 58 min, 55 sec  
Date: Feb 19 2020

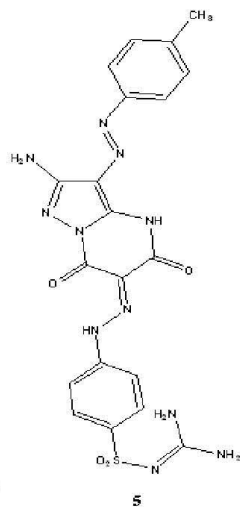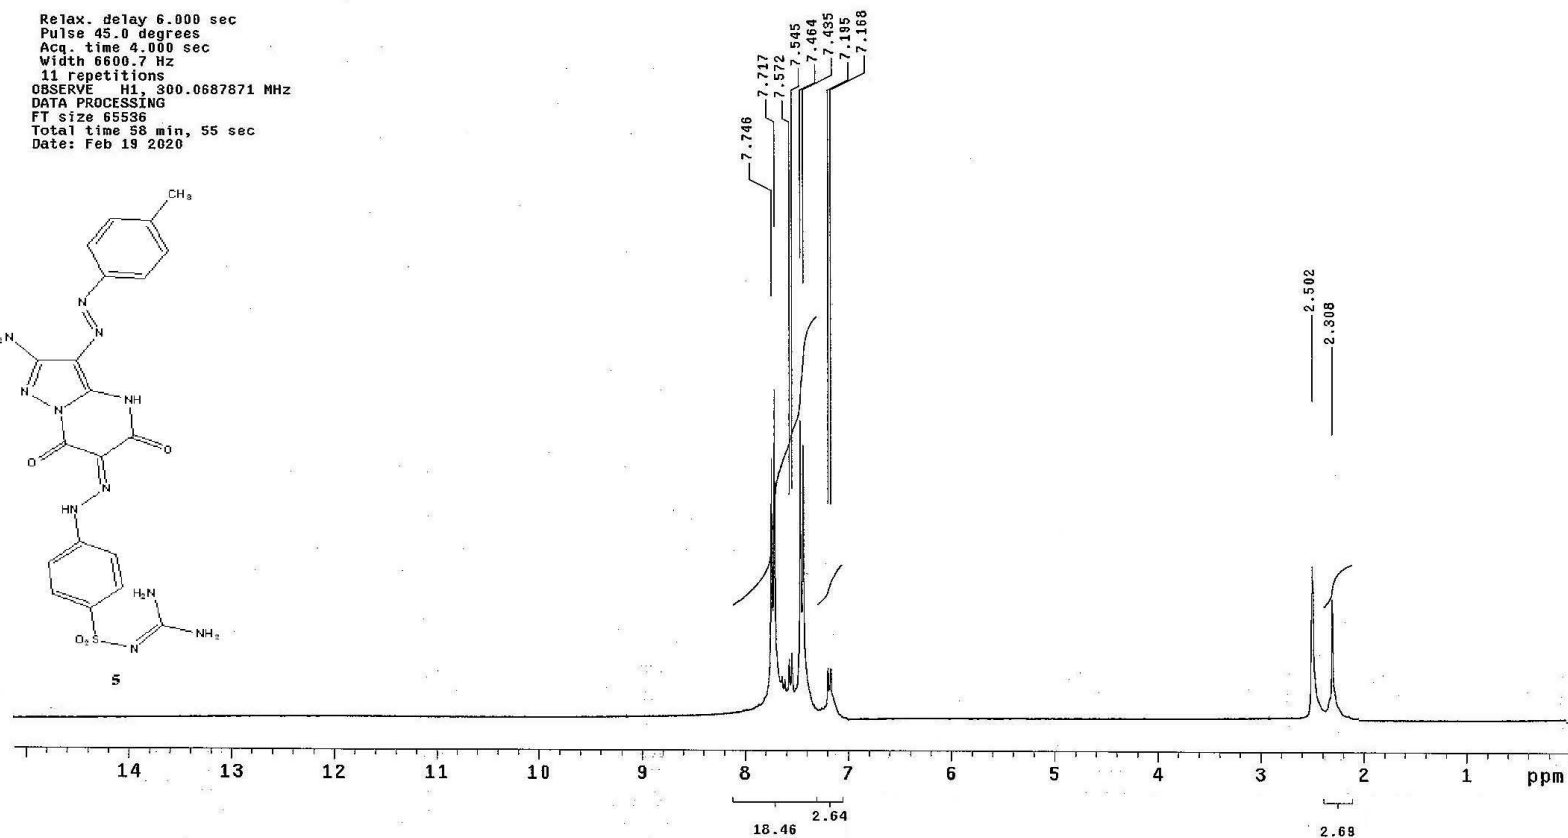

# 13C-NMR spectrum of compound 5

KerlessIkram-K6DEM-DMSO-C13

Archive directory: /export/home/vnmr1/vnmrsys/data  
Sample directory: DD5mm\_test\_12Mar2014-21:34:40  
File: PROTON

Pulse Sequence: s2pu1

Solvent: DMSO

Ambient temperature

Mercury-30088 "NMR300"

Pulse 45.0 degrees  
Acq. time 1.787 sec  
Width 18761.7 Hz  
2640 repetitions  
OBSERVE C13, 75.4523885 MHz  
DECOUPLE H1, 300.0702830 MHz  
Power 34 dB  
continuously on  
WALTZ-16 modulated  
DATA PROCESSING  
Line broadening 1.0 Hz  
FT size 65536  
Total time 21 hr, 47 min, 2 sec  
Date: Feb 19 2020

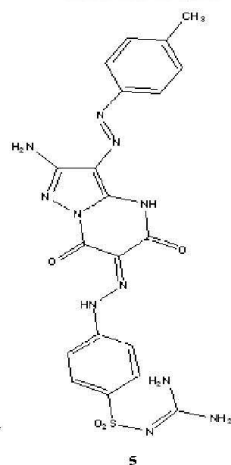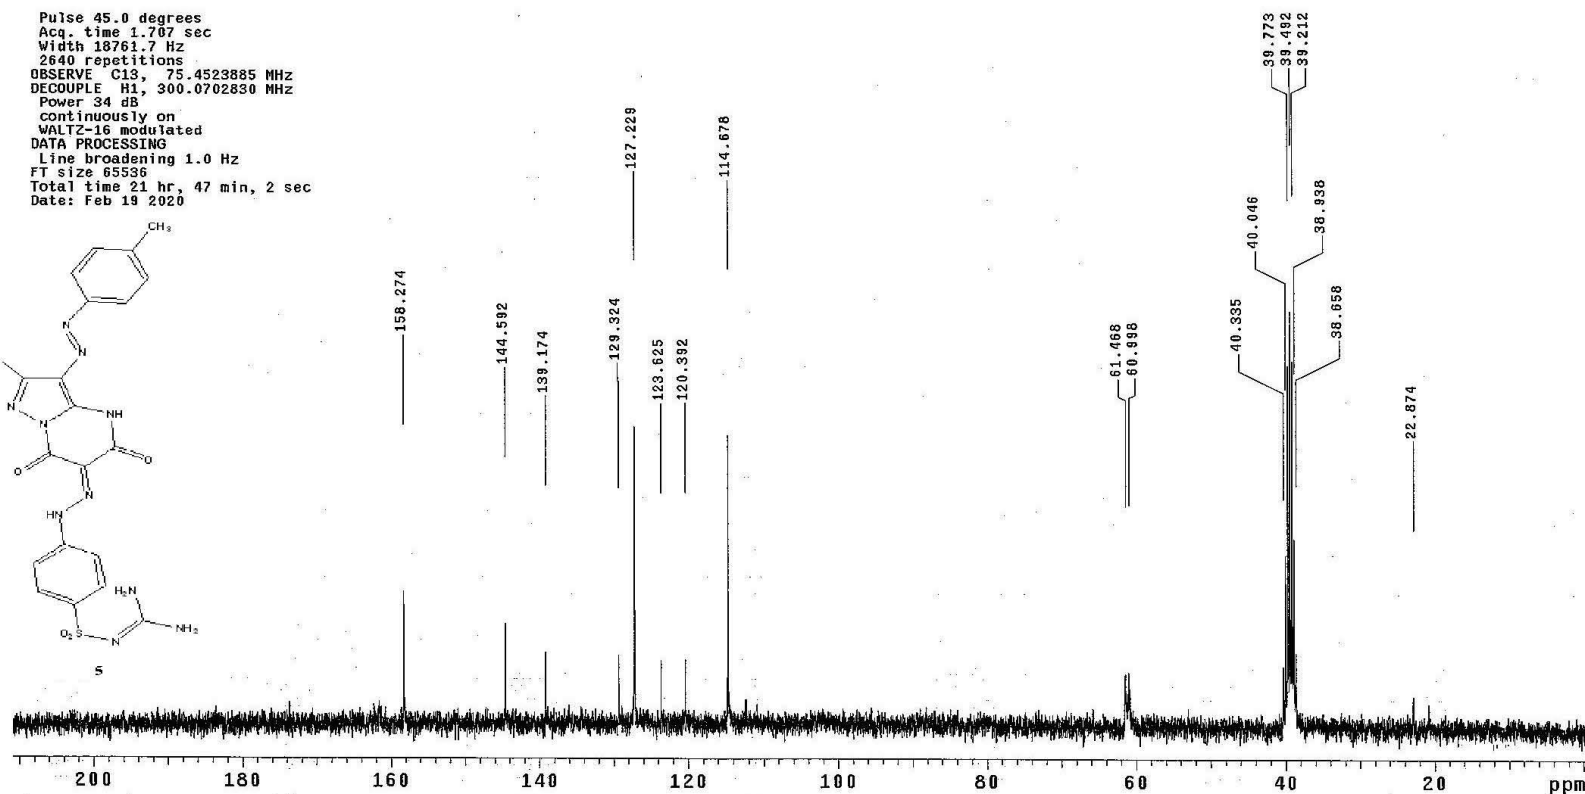

nshed-abd-elfattah-k6DME #177 RT: 2.98 AV: 1 SB: 2 4.45 , 4.45 NL: 4.40E2  
T: {0,0} + e EI Full ms [40.00-1000.00]

# mass spectrum of compound 5

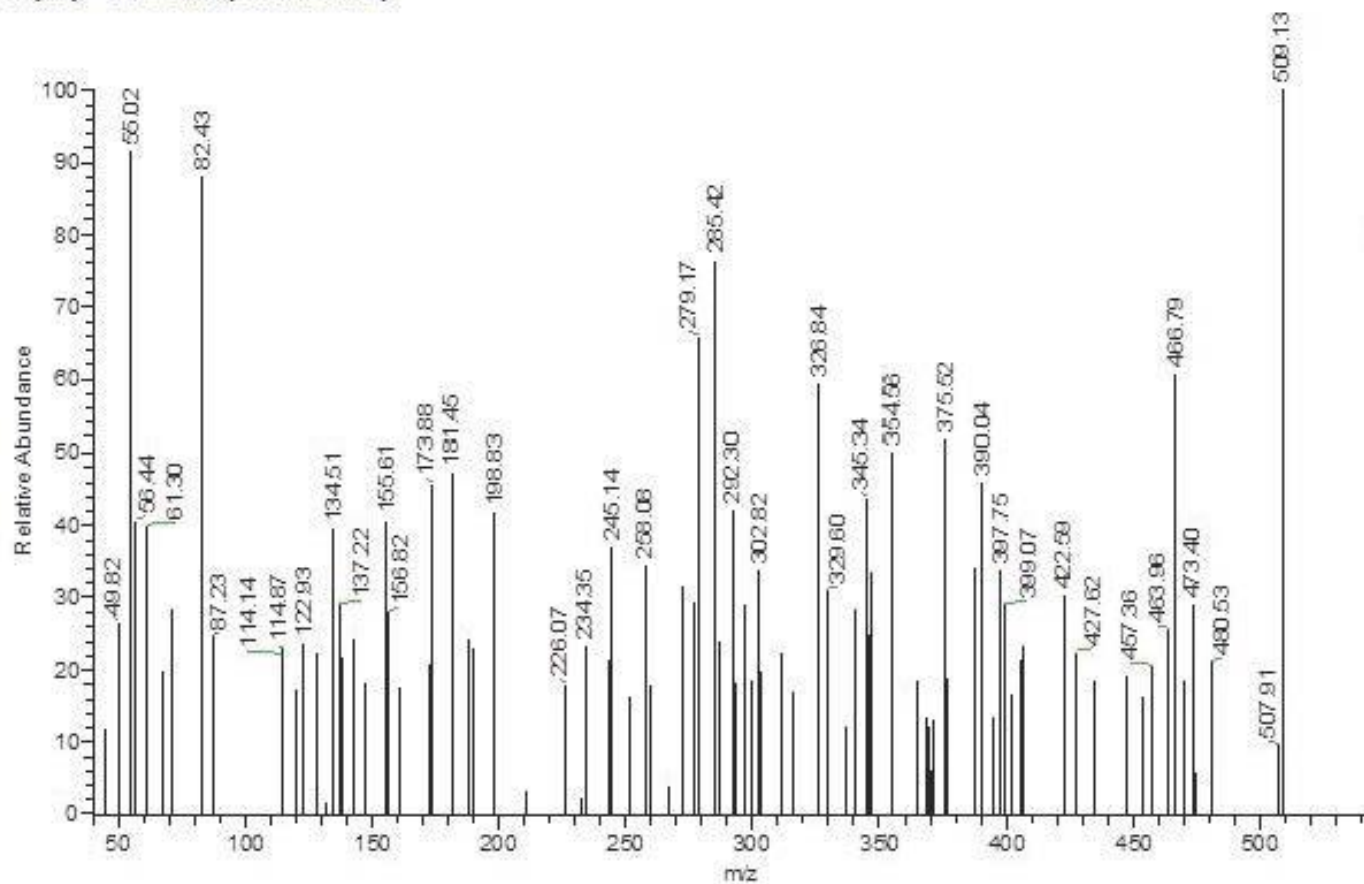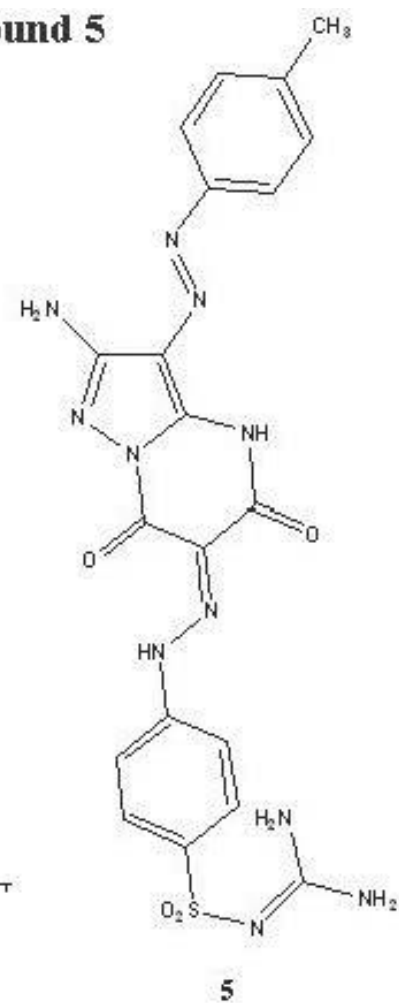

K6AMY.0

IR spectrum of compound 6

12/2/2019

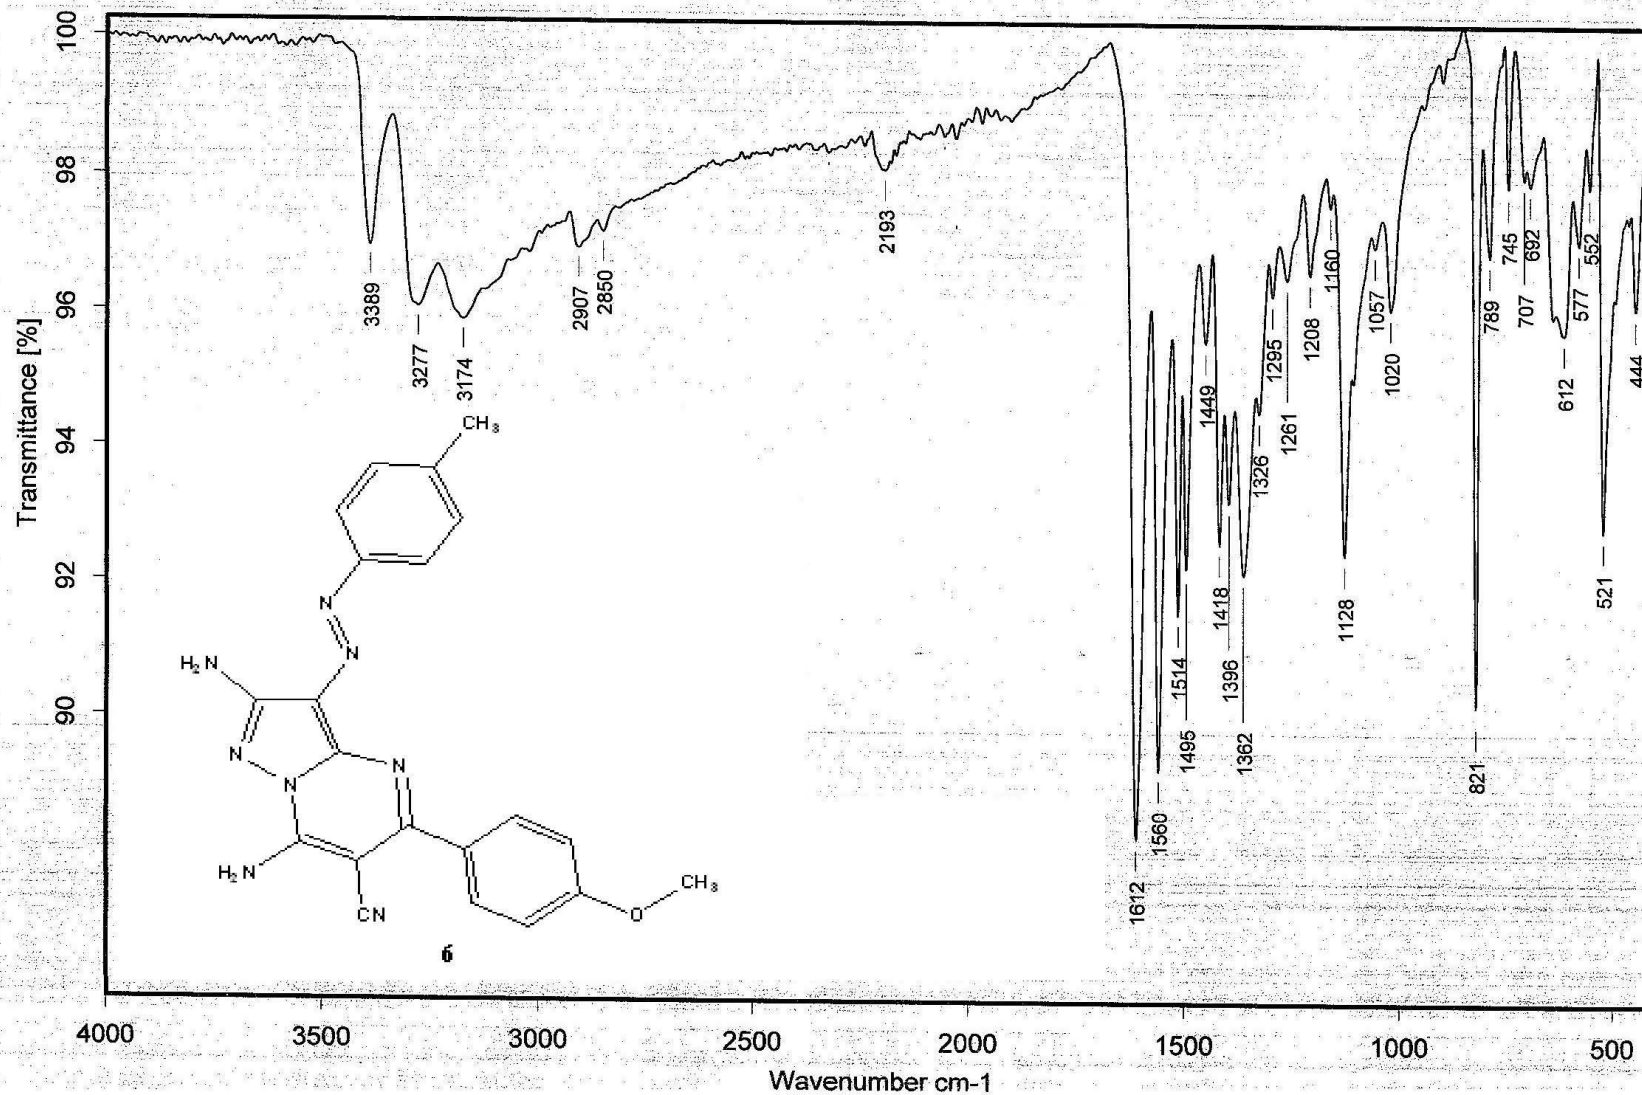

# <sup>1</sup>H-NMR spectrum of compound 6

KerlessIkram-K6Ary-DMSO-H1

Archive directory: /export/home/vnmr1/vnmrsys/data  
Sample directory: DD5mm\_test\_12Mar2014-21:34:40  
File: PROTON

Pulse Sequence: s2pu1

Solvent: DMSO  
Temp. 30.0 C / 303.1 K  
Mercury-300BB "NMR300"

Relax. delay 6.000 sec  
Pulse 45.0 degrees  
Acq. time 4.000 sec  
Width 6500.7 Hz  
10 repetitions  
OBSERVE H1, 300.0687871 MHz  
DATA PROCESSING  
Line broadening 0.2 Hz  
FT size 65536  
Total time 58 min, 55 sec  
Date: Feb 19 2020

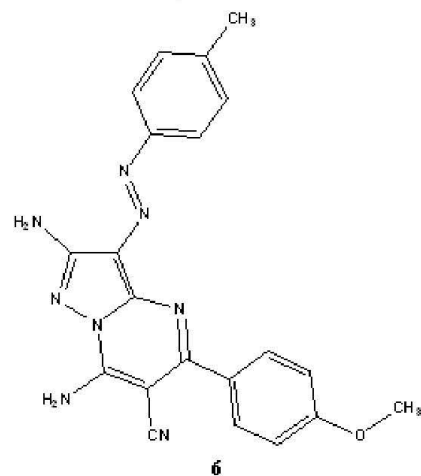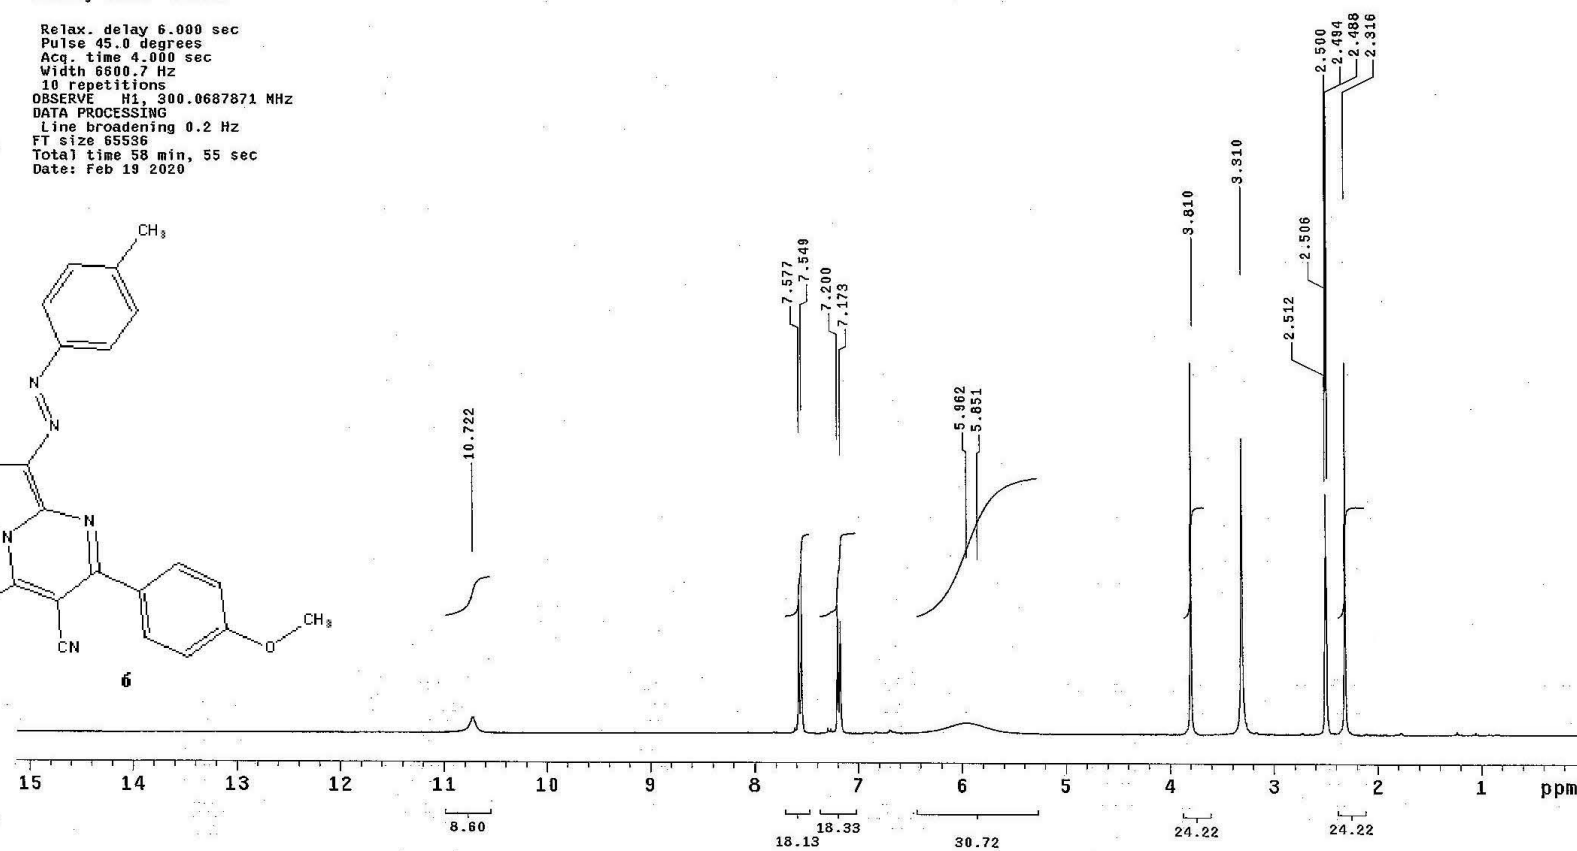

# **<sup>1</sup>H-NMR-D<sub>2</sub>O spectrum of compound 6**

KerlexxIkram-K6Ary-DMSO-D<sub>2</sub>O-H1

Archive directory: /export/home/vnmr1/vnmrsys/data  
Sample directory: DD5mm\_test\_12Mar2014-21:34:40  
File: PROTON

Pulse Sequence: s2pu1

Solvent: DMSO  
Temp. 30.0 C / 303.1 K  
Mercury-300BB "NMR300"

Relax. delay 6.000 sec  
Pulse 45.0 degrees  
Acq. time 4.000 sec  
Width 6600.7 Hz  
14 repetitions  
OBSERVE H1, 300.0687871 MHz  
DATA PROCESSING  
Line broadening 0.2 Hz  
FT size 65536  
Total time 58 min, 55 sec  
Date: Feb 19 2020

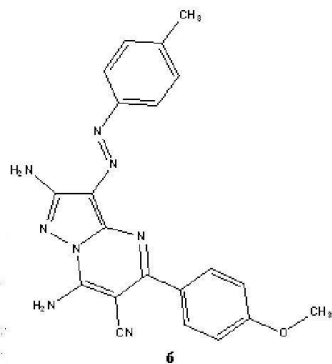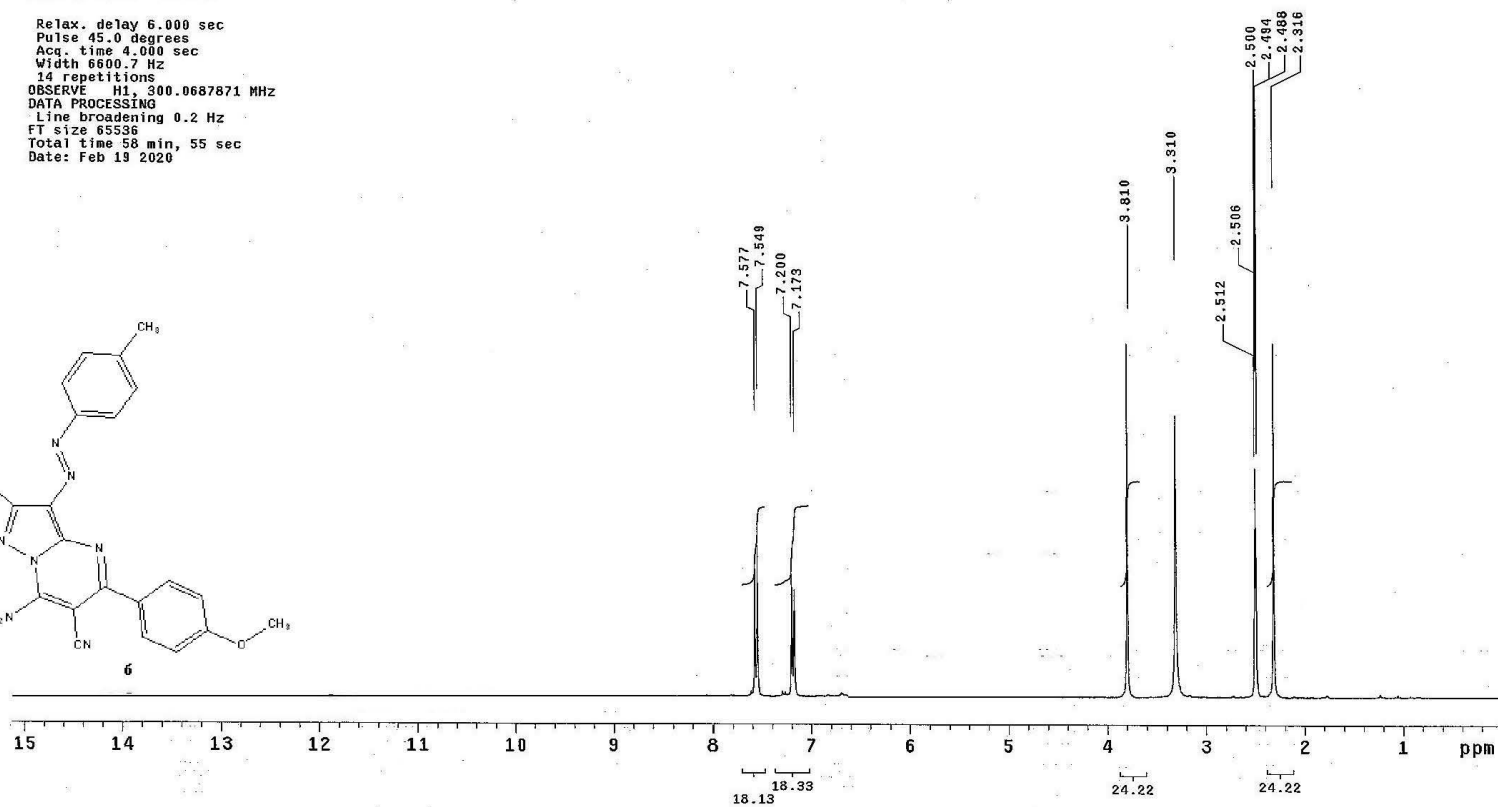

# **<sup>13</sup>C-NMR spectrum of compound 6**

KerlessIkram-K6Ary-DMSO-C13

Archive directory: /export/home/vnmr1/vnmrsys/data  
Sample directory: DD5mm\_test\_12Mar2014-21:34:40  
File: PROTON

Pulse Sequence: s2pu1

Solvent: DMSO  
Ambient temperature  
Mercury-300BB "NMR300"

Pulse 45.0 degrees  
Acq. time 1.707 sec  
Width 18761.7 Hz  
1312 repetitions  
OBSERVE C13, 75.4523885 MHz  
DECOUPLE H1, 300.0702830 MHz  
Power 34 dB  
Continuously on  
WALTZ-16 modulated  
DATA PROCESSING  
Line broadening 1.0 Hz  
FT size 65536  
Total time 21 hr, 47 min, 2 sec  
Date: Feb 19 2020

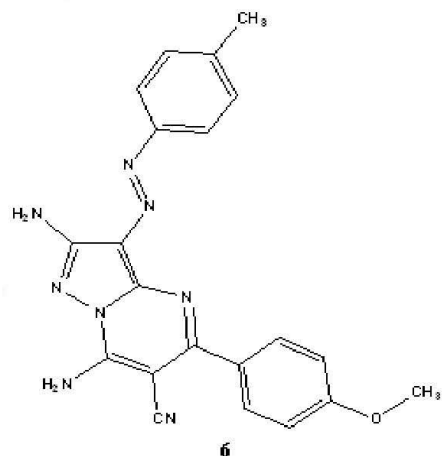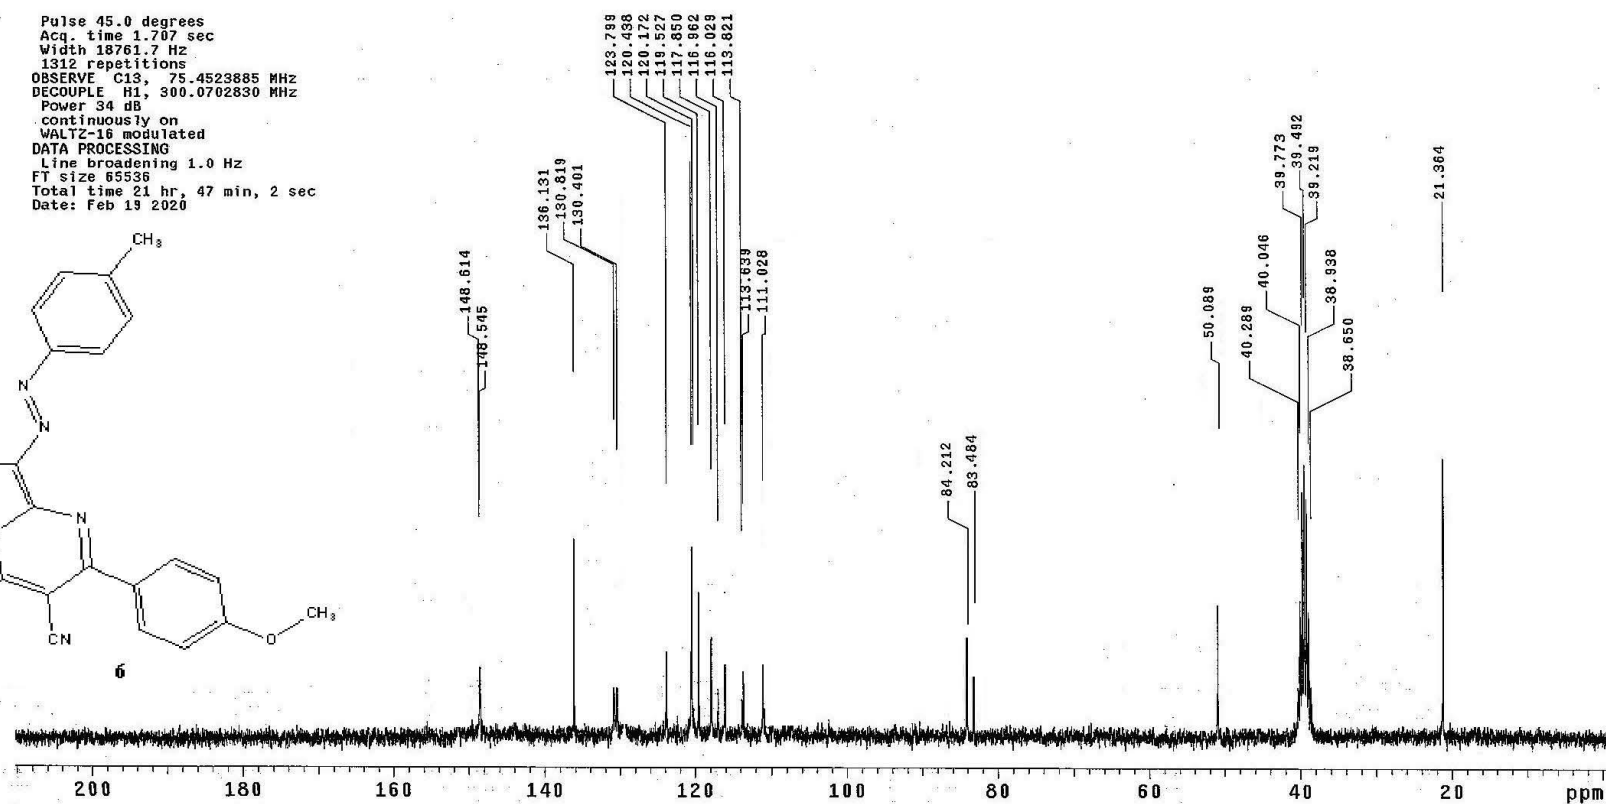

nahed-abd-elfattah-k6ary#92 RT: 1.56 AV: 1 SB: 2 4.45, 4.45 NL: 4.41E2  
T: {0,0} + e EI Full ms [40.00-1000.00]

# mass spectrum of compound 6

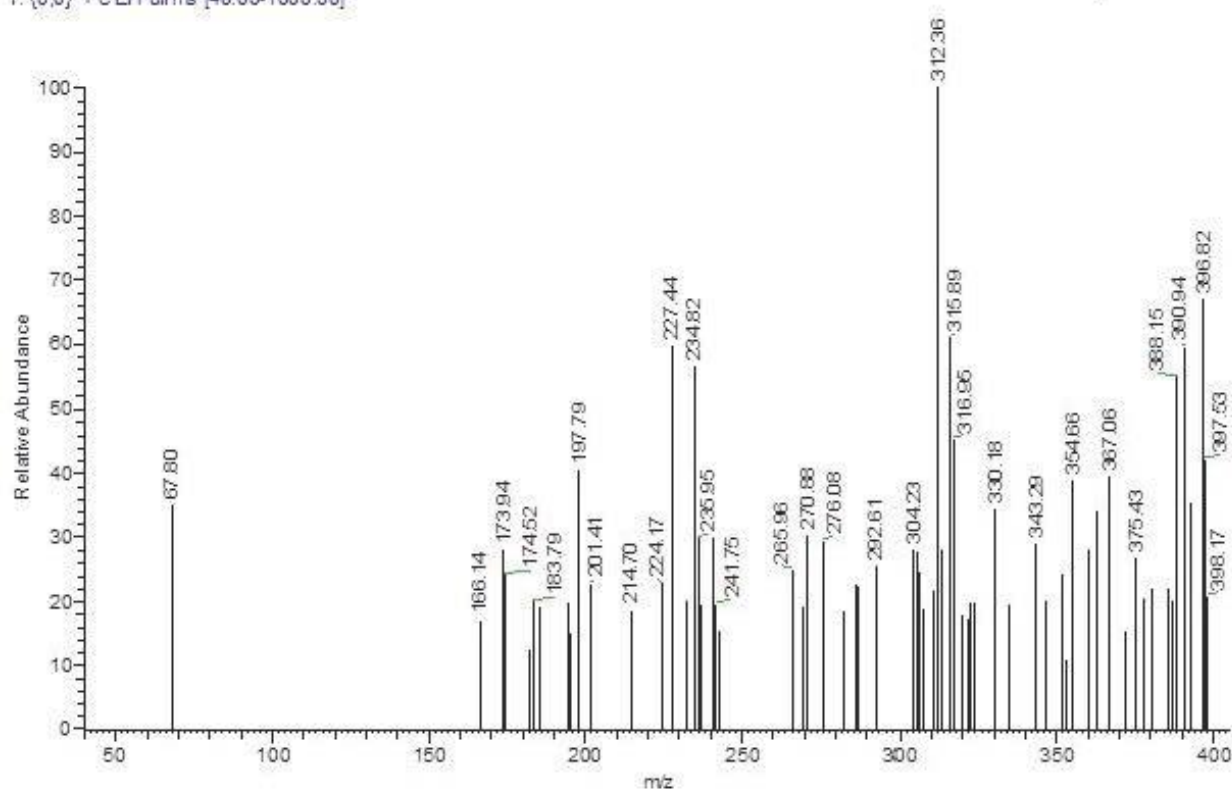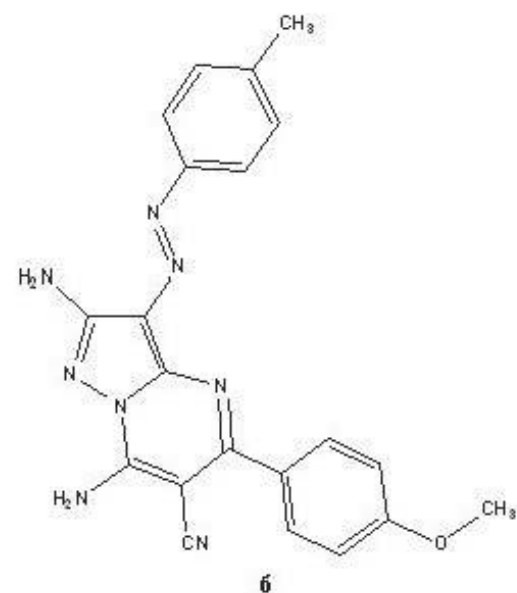



K6Mn.0

## IR spectrum of compound 7

12/2/2019

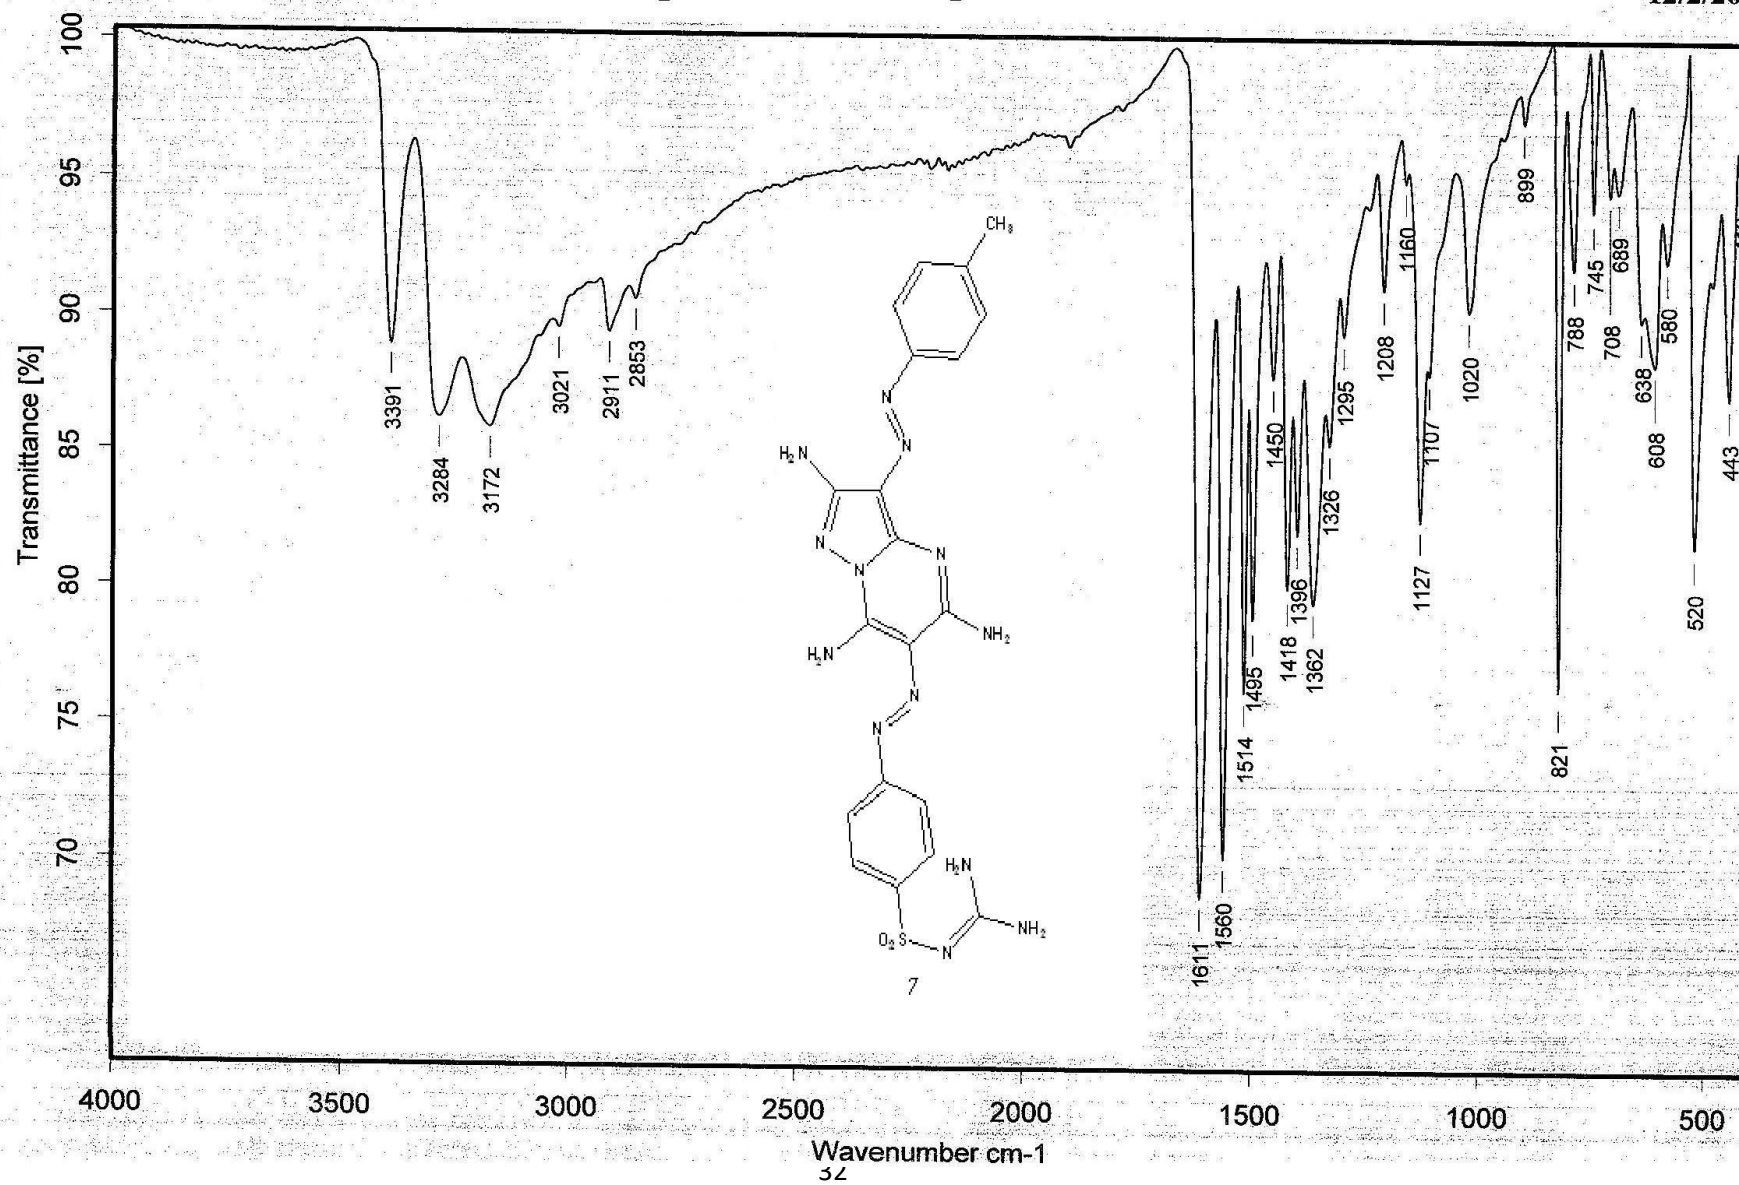

# 1H-NMR-D2O spectrum of compound 7

KerlexxIkram-K6DMn-DMSO-D2O-H1

Archive directory: /export/home/vnmr1/vnmrsys/data  
Sample directory: D05mm\_test\_12Mar2014-21:34:40  
File: PROTON

Pulse Sequence: s2pu1

Solvent: DMSO  
Temp. 30.0 C / 303.1 K  
Mercury-300BB "NMR300"

Relax. delay 6.000 sec  
Pulse 45.0 degrees  
Acq. time 4.000 sec  
Width 6600.7 Hz  
27 repetitions  
OBSERVE H1, 300.0687871 MHz  
DATA PROCESSING  
Line broadening 0.2 Hz  
FT size 65536  
Total time 58 min, 55 sec  
Date: Feb 19 2020

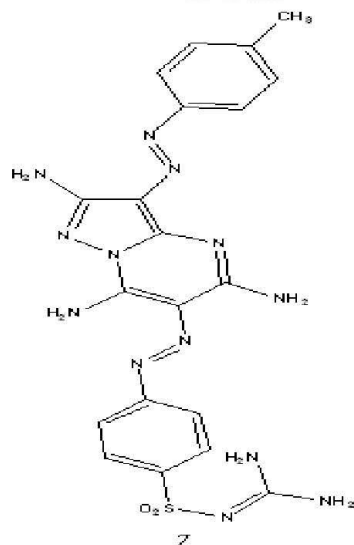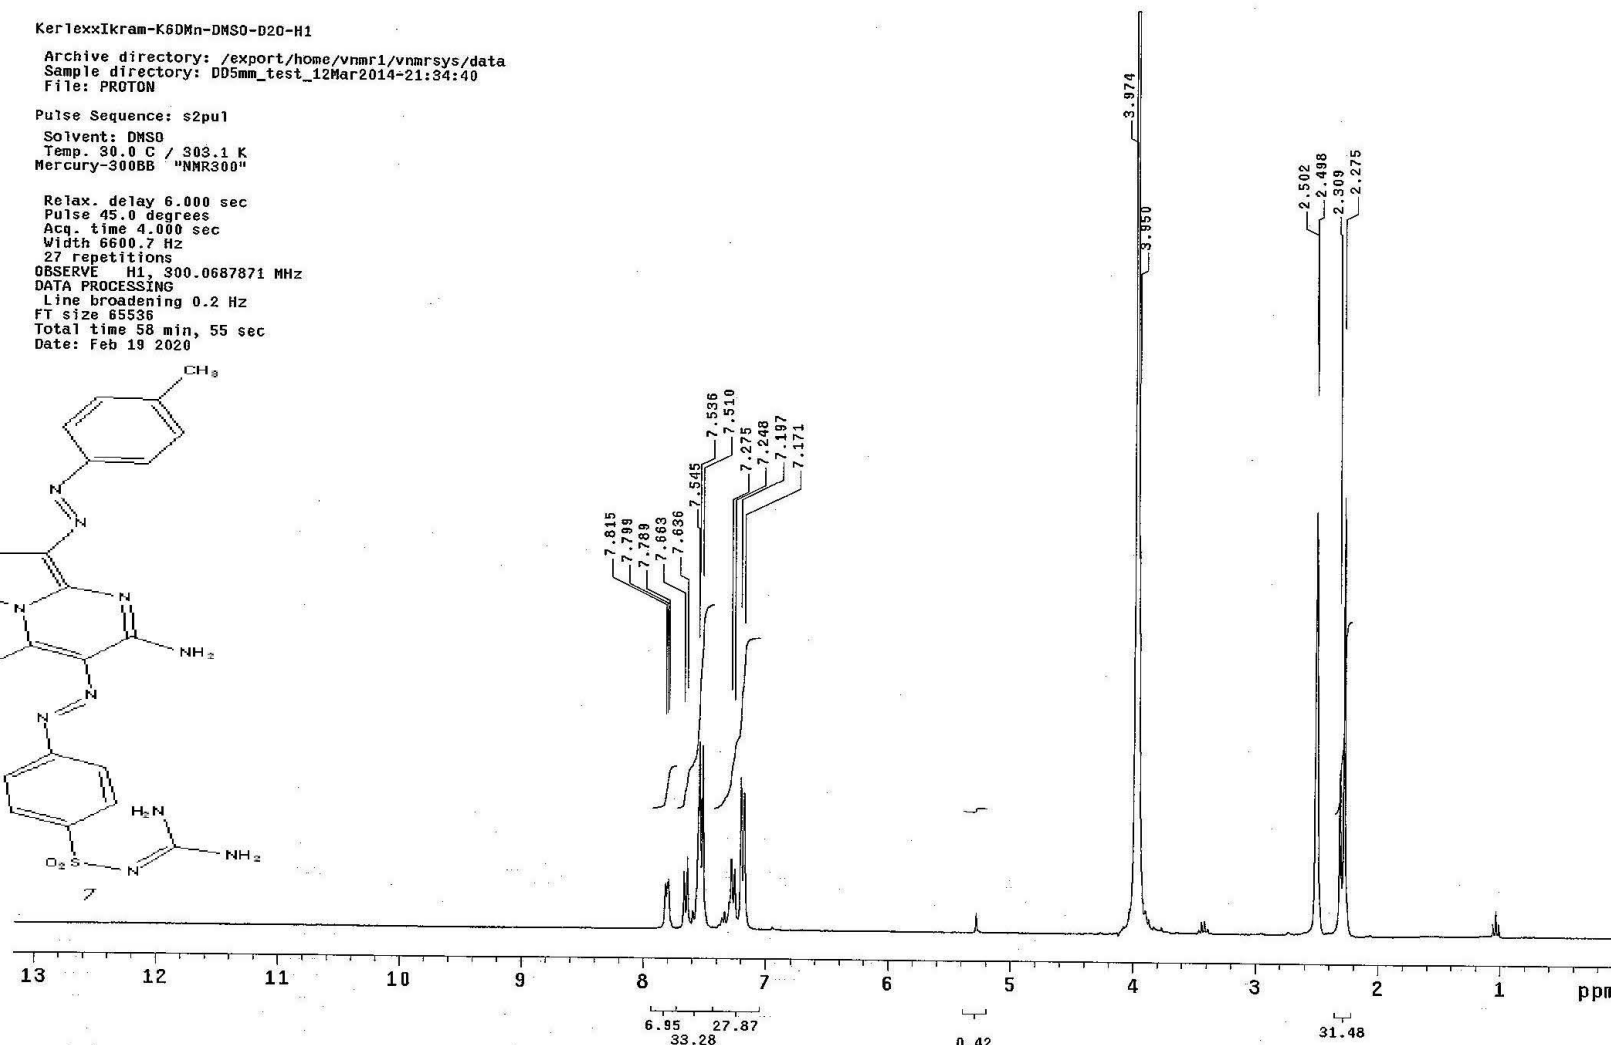

# <sup>1</sup>H-NMR spectrum of compound 7

KerlessIkram-K6DMn-DMSO-H1

Archive directory: /export/home/vnmr1/vnmrsys/data  
Sample directory: DD5mm\_test\_12Mar2014-21:34:40  
File: PROTON

Pulse Sequence: s2pu1

Solvent: DMSO  
Temp. 30.0 C / 303.1 K  
Mercury-300SB "NMR300"

Relax. delay 6.000 sec  
Pulse 45.0 degrees  
Acq. time 4.000 sec  
Width 6600.7 Hz  
15 repetitions  
OBSERVE H1, 300.0687871 MHz  
DATA PROCESSING  
Line broadening 0.2 Hz  
FT size 65536  
Total time 58 min, 55 sec  
Date: Feb 19 2020

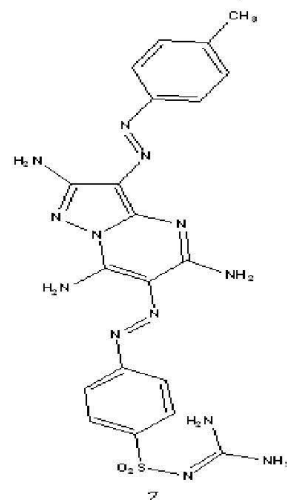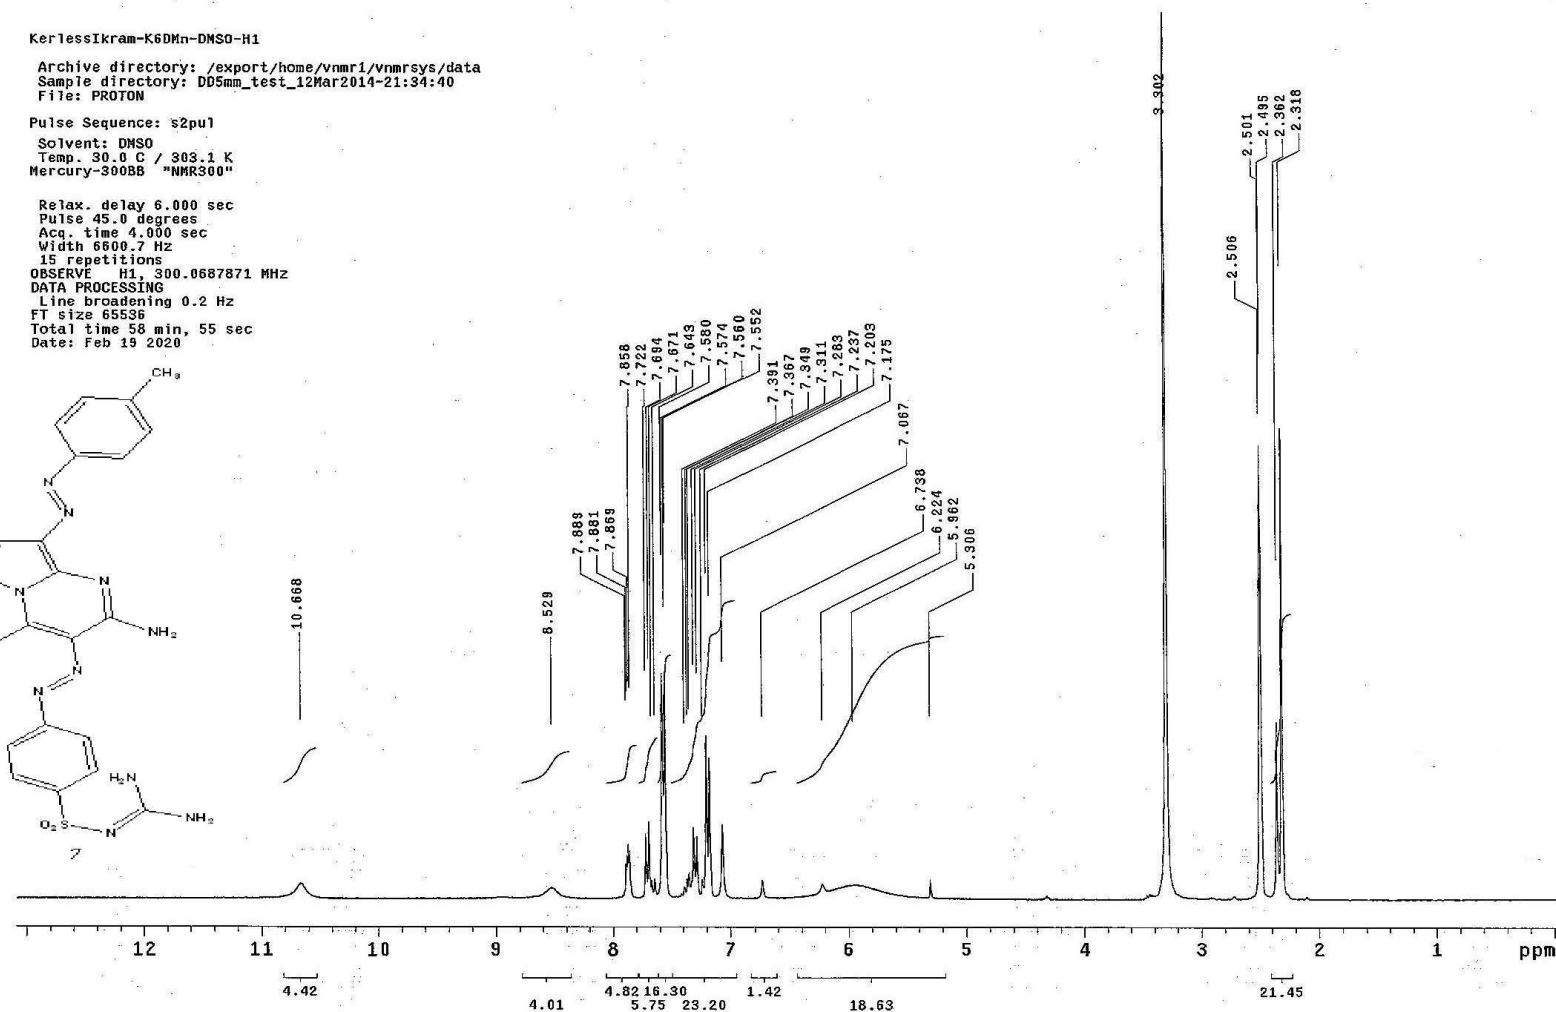

nahed-abd-elfattah-k6DMin #195 RT: 3.28 AV: 1 SB: 2 4.45, 4.46 NL: 3.18E3  
T: {0.0} + c EI Full ms [40.00-1000.00]

# mass spectrum of compound 7

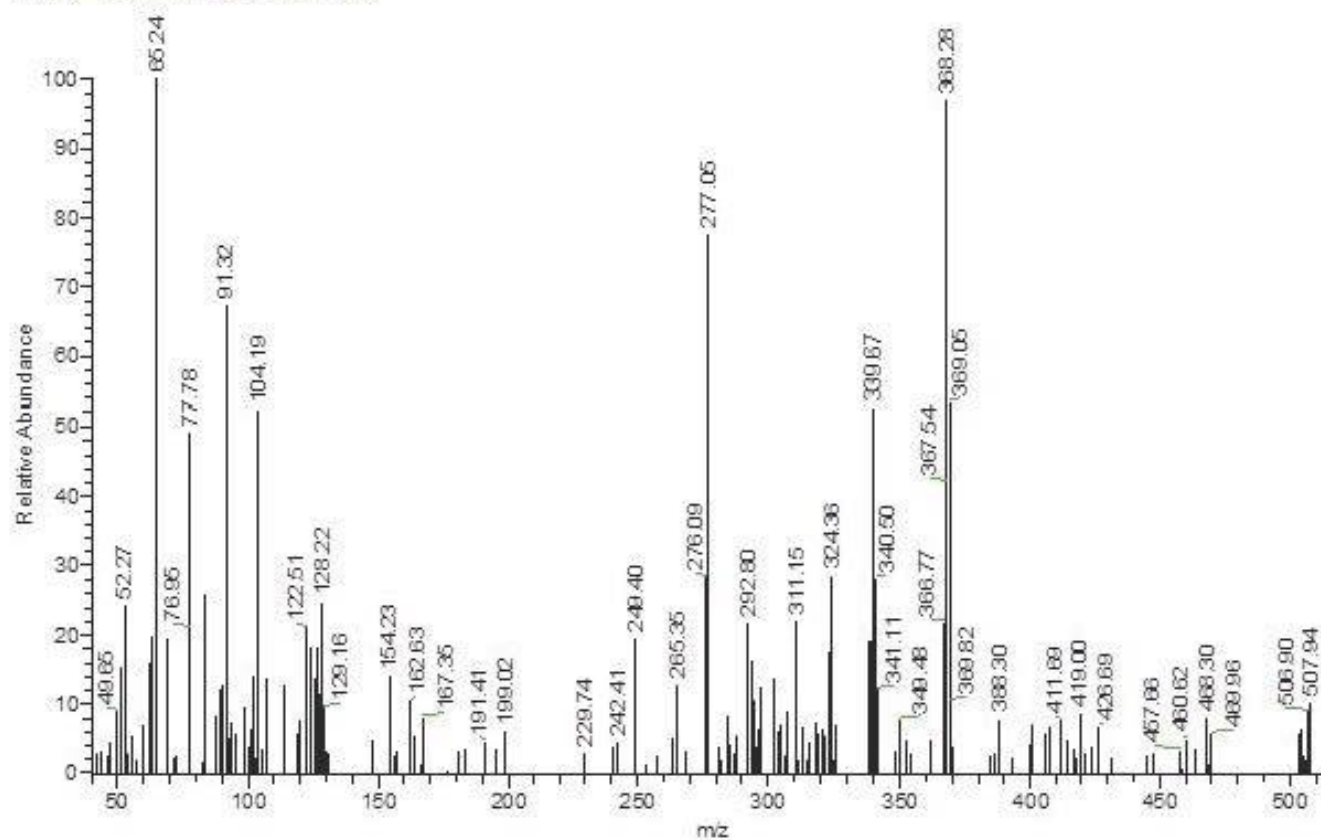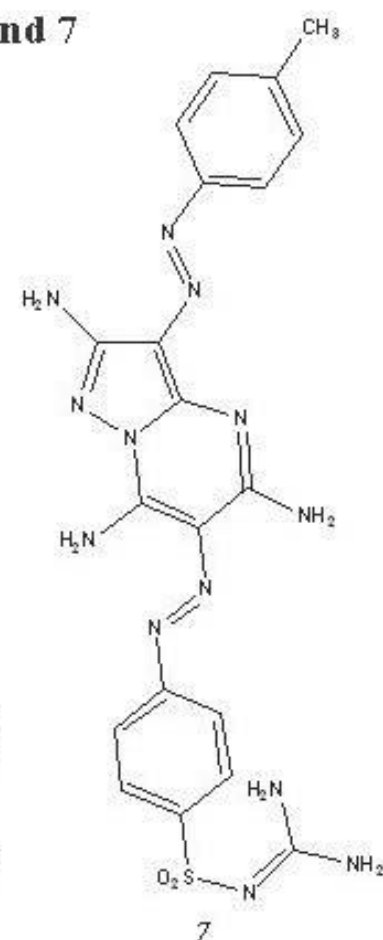

Supplement: s1 [file s1]
